# Supplementary material for: Wilms Tumor 1b defines a wound-specific sheath cell subpopulation associated with notochord repair
Source: eLife journal article supplement (doi:10.7554/elife.30657), 2018-02-06
Supplement: supp [file elife-30657-supp-v1.zip]

a

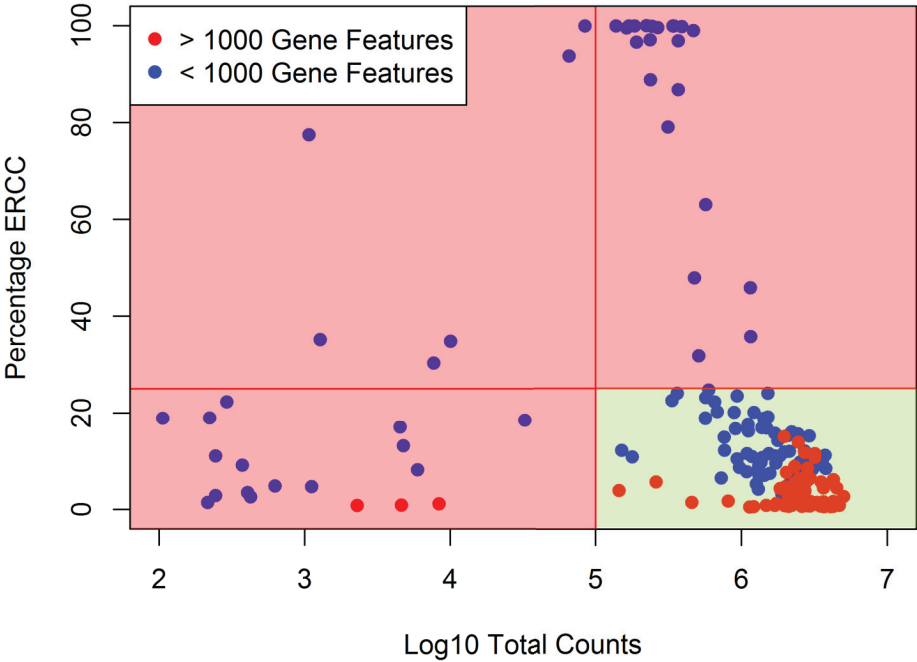

b

| Single-Cells<br>(33 Total) | Average Total Counts/Library<br>Size | Average Total Gene<br>Features | Average Percentage ERCC<br>Count |
|----------------------------|--------------------------------------|--------------------------------|----------------------------------|
| EGFP (n = 2)               | 3,615,781                            | 1136                           | 3.94                             |
| EGFP + Cherry<br>(n = 17)  | 2,376,580                            | 1520                           | 5.75                             |
| mCherry<br>(n = 14)        | 3,050,489                            | 1385                           | 6.89                             |

c

| 10-Cells<br>(41 Total)     | Average Total Counts/Library<br>Size | Average Total Gene<br>Features | Average Percentage ERCC<br>Count |
|----------------------------|--------------------------------------|--------------------------------|----------------------------------|
| EGFP<br>(n = 10)           | 2,738,134                            | 2536                           | 1.16                             |
| EGFP + mCherry<br>(n = 10) | 2,424,647                            | 3758                           | 0.92                             |
| mCherry<br>(n = 21)        | 3,180,981                            | 2642                           | 1.18                             |

Figure 4 - figure supplement 1. Lopez-Baez et al.
