# Supplementary material for: Wilms Tumor 1b defines a wound-specific sheath cell subpopulation associated with notochord repair
Source: eLife journal article supplement (doi:10.7554/elife.30657), 2018-02-06
Supplement: supp [file elife-30657-supp-v1.zip]

Archive with 16 entries (16 files):
- elife_poa_e30657_Figure_2_figure_supplement_1.pdf
- elife_poa_e30657_Supplementary_File_1.xlsx
- elife_poa_e30657_Figure_1_figure_supplement_2.pdf
- elife_poa_e30657_Figure_3_source_data_2.xlsx
- elife_poa_e30657_Movie_1.mov
- elife_poa_e30657_Transparent_Reporting_File.docx
- elife_poa_e30657_Figure_1_figure_supplement_1.pdf
- elife_poa_e30657_Figure_3_source_data_1.xlsx
- elife_poa_e30657_Supplementary_File_2.xlsx
- elife_poa_e30657_Figure_4_figure_supplement_1.pdf
- elife_poa_e30657_Figure_2_figure_supplement_1_source_data_1.xlsx
- elife_poa_e30657_Figure_6_figure_supplement_1.pdf
- elife_poa_e30657_Figure_8_figure_supplement_1.pdf
- elife_poa_e30657_Figure_2_figure_supplement_2.pdf
- elife_poa_e30657_Figure_4_source_data_1.xlsx
- elife_poa_e30657_Figure_8_figure_supplement_1_source_data_1.xlsx
