# Supplementary material for: Wilms Tumor 1b defines a wound-specific sheath cell subpopulation associated with notochord repair
Source: eLife journal article supplement (doi:10.7554/elife.30657), 2018-02-06
Supplement: supp [file elife-30657-supp-v1.zip › elife_poa_e30657_Figure_2_figure_supplement_1_source_data_1.xlsx]

## Sheet: Fig 2 - fig sup 1e -Source Data
Figure 2 - figure supplement 1e - Source Data
	GFP-inj		GFP mCherry-inj		mCherry-inj		total inj			GFP-uninj		GFP mCherry-uninj		mCherry-uninj		total uninj
sorting	cell number	percentage	cell number	percentage	cell number	percentage	cell number			cell number	percentage	cell number	percentage	cell number	percentage	cell number
2017-11-21	3836	0.61376	448	0.07168	1966	0.31456	6250			612	0.33887	20	0.0110742	1174	0.650055	1806
2017-11-08	2271	0.465655	1244	0.255075	1362	0.27927	4877			98	0.182156	13	0.0241636	427	0.79368	538
2017-10-12	2423	0.588392	917	0.222681	778	0.188927	4118			76	0.24918	1	0.00327869	228	0.747541	305
by Juan	264	0.222785	289	0.243882	632	0.533333	1185			161	0.179088	3	0.00333704	735	0.817575	899
Statistics
mean		0.472648		0.198329		0.329023
STDV		0.17869		0.0854949		0.146121
Multiple T test (inj vs uninj)		0.0512662		0.00473971		0.00208099
Summary		NS		**		**
