# Supplementary material for: Wilms Tumor 1b defines a wound-specific sheath cell subpopulation associated with notochord repair
Source: eLife journal article supplement (doi:10.7554/elife.30657), 2018-02-06
Supplement: supp [file elife-30657-supp-v1.zip › elife_poa_e30657_Figure_3_source_data_1.xlsx]

## Sheet: Fig 3f - Source Data
Figure 3f - Source Data
Include	Color	Pos	Name	Ct	sample	mean Ct	△Ct (CtMgp-CtActin)	StDev	P value (injured vs uninjured)-Ttest	summary	note
qPCR run on 12/09/2017
actin
TRUE	255	G1	Sample 73	39.39	injured3d	38.4
TRUE	255	G2	Sample 74	37.41	injured3d,replicate
TRUE	255	H1	Sample 85	40	uninjured3d	38.805
TRUE	255	H2	Sample 86	37.61	uninjured3d,replicate
mgp
TRUE	255	G5	Sample 77	27.91	injured3d	28.27	-10.13	0.509117	0.025	**	used in the graph
TRUE	255	G6	Sample 78	28.63	injured3d,replicate
TRUE	255	H5	Sample 89	35.77	uninjured3d	35.845	-2.96	0.106066			used in the graph
TRUE	255	H6	Sample 90	35.92	uninjured3d,replicate
qPCR run on 28/09/2017 for confirmation
actin
TRUE	255	A11	Sample 11	26.29	injured3d	26.165
TRUE	255	B11	Sample 23	26.04	injured3d,replicate
TRUE	255	A12	Sample 12	26.78	uninjured3d	26.81
TRUE	255	B12	Sample 24	26.84	uninjured3d,replicate
mgp
TRUE	255	G11	Sample 83	23.46	injured3d	23.46	-2.705	0	0.000338325	***
TRUE	255	H11	Sample 95	23.46	injured3d,replicate
TRUE	255	G12	Sample 84	28.81	uninjured3d	28.725	1.915	0.120208
TRUE	255	H12	Sample 96	28.64	uninjured3d,replicate
