# Supplementary material for: Wilms Tumor 1b defines a wound-specific sheath cell subpopulation associated with notochord repair
Source: eLife journal article supplement (doi:10.7554/elife.30657), 2018-02-06
Supplement: supp [file elife-30657-supp-v1.zip › elife_poa_e30657_Figure_3_source_data_2.xlsx]

## Sheet: Fig 3g - Source Data
Figure 3g - Source Data
Include	Color	Pos	Name	Ct	sample	mean Ct	△Ct (CtSox9b-CtGAPDH)	StDev	P value (injured vs uninjured)-Ttest	summary
GAPDH
TRUE	255	A12	Sample 12	16.49	injured3d-AB	16.295
TRUE	255	B12	Sample 36	16.1	injured3d-AB replicate
TRUE	255	A14	Sample 14	16.75	uninjured3d-AB	16.45
TRUE	255	B14	Sample 38	16.15	uninjured3d-AB replicate
sox9b
TRUE	255	N12	Sample 324	26.85	injured3d-AB 72hpi	26.85	10.555	0.05	0.0072582	***
TRUE	255	O12	Sample 348	26.8	injured3d-AB 72hpi replicate
TRUE	255	P12	Sample 372	26.9	injured3d-AB 72hpireplicate
TRUE	255	N14	Sample 326	27.75	uninjured3d-AB 72hpi	28.23	11.78	0.417612
TRUE	255	O14	Sample 350	28.43	uninjured3d-AB 72hpi replicate
TRUE	255	P14	Sample 374	28.51	uninjured3d-AB 72hpi replicate
TRUE	255	K8	Sample 248	26.85	injured3d-AB 48hpi	26.79	9.79	0.122202	0.0014	***
TRUE	255	L8	Sample 272	26.61	injured3d-AB 48hpi replicate
TRUE	255	M8	Sample 296	26.69	injured3d-AB 48hpi replicate
TRUE	255	K10	Sample 250	28.05	uninjured3d-AB 48hpi	28.27	11.11	0.231805
TRUE	255	L10	Sample 274	28.23	uninjured3d-AB 48hpi replicate
TRUE	255	M10	Sample 298	28.51	uninjured3d-AB 48hpi replicate
