# Supplementary material for: Wilms Tumor 1b defines a wound-specific sheath cell subpopulation associated with notochord repair
Source: eLife journal article supplement (doi:10.7554/elife.30657), 2018-02-06
Supplement: supp [file elife-30657-supp-v1.zip › elife_poa_e30657_Figure_4_source_data_1.xlsx]

## Sheet: Figure 4d- Source Data 1
Figure 4d - Source Data 1
qPCR run 11/12/2017
gene	sample	Ct1	Ct1	mean CT	△Ct (GeneAVG-ActinAVG)	StDev	P value ( against GFP mCherry)	Summary
actin	GFP	22.67	22.79	22.73
	GFP mCherry	32.26	32.31	32.285
	mCherry	23.66	23.8	23.73
Mpg	GFP	24.91	25.06	24.985	2.255	0.1061	0.001	***	used in the graph
	GFP mCherry	21.54	21.64	21.59	-10.695	0.0707
	mCherry	33.47	35.96	33.47	9.74	1.7	0.035	**	used in the graph
qPCR run 27/11/2017
gene	sample	Ct1	Ct1	mean CT	△Ct (GeneAVG-ActinAVG)	StDev	P value	Summary
actin	GFP	23.98	23.95	23.965
	GFP mCherry	31.57	31.79	31.68
	mCherry	25.96	25.75	25.855
Mpg	GFP	24.7	25.9	25.3	1.335	0.848528	0.0389644	**
	GFP mCherry	20.52	24.6	22.56	-9.12	2.885
	mCherry	33.65	33.8	33.725	7.87	0.106066	0.0141312	**
