# Supplementary material for: Wilms Tumor 1b defines a wound-specific sheath cell subpopulation associated with notochord repair
Source: eLife journal article supplement (doi:10.7554/elife.30657), 2018-02-06
Supplement: supp [file elife-30657-supp-v1.zip › elife_poa_e30657_Figure_8_figure_supplement_1_source_data_1.xlsx]

## Sheet: Fig 8 - fig sup 1h -Source Data
Figure 8 - figure supplement 1h - Source Data
Include	Color	Pos	Name	Ct	sample	mean Ct	△Ct (CtWt1a-CtGAPDH)	StDev	P value (injured vs uninjured)-Ttest	summary
GAPDH
TRUE	255	A11	Sample 11	16.73	injured	16.495
TRUE	255	B11	Sample 35	16.26	injured replicate
TRUE	255	A13	Sample 13	17.47	uninjured	17.31
TRUE	255	B13	Sample 37	17.15	uninjured replicate
wt1a primer set1
TRUE	255	E11	Sample 107	30.09	injured	29.9333	13.4383	0.137961	0.00101151	***
TRUE	255	F11	Sample 131	29.88	injured replicate
TRUE	255	G11	Sample 155	29.83	injured replicate
TRUE	255	E13	Sample 109	31.69	uninjured	31.5933	14.2833	0.100167
TRUE	255	F13	Sample 133	31.6	uninjured replicate
TRUE	255	G13	Sample 157	31.49	uninjured replicate
wt1a primer set2
TRUE	255	H11	Sample 179	28.27	injured	28.1033	11.6083	0.145717	0.00947739	**
TRUE	255	I11	Sample 203	28	injured replicate
TRUE	255	J11	Sample 227	28.04	injured replicate
TRUE	255	H13	Sample 181	29.47	uninjured	29.4733	12.1633	0.145029
TRUE	255	I13	Sample 205	29.62	uninjured replicate
TRUE	255	J13	Sample 229	29.33	uninjured replicate
