# Supplementary material for: Wilms Tumor 1b defines a wound-specific sheath cell subpopulation associated with notochord repair
Source: eLife journal article supplement (doi:10.7554/elife.30657), 2018-02-06
Supplement: supp [file elife-30657-supp-v1.zip › elife_poa_e30657_Supplementary_File_1.xlsx]

## Sheet: Sup File 1a Differential List
10-cell differential expression list (generated by the SCDE package) ranked by acending z-score, with positive scores associated with cluster 2 (EGFP, mCherry) and negative scores associated with cluster 3 (mCherry)
Gene name	score
eef2k	-4.69802
matn3a	-4.54184
mettl17	-4.25793
terfa	-4.22843
zgc:85777	-4.0841
bmp4	-4.06766
ecm1b	-4.05605
fzd2	-4.01842
hyi	-3.94288
pias1b	-3.89194
cpe	-3.8209
CABZ01075125.1	-3.79118
oaz2a	-3.71824
plekhn1	-3.71116
zgc:158852	-3.64303
rchy1	-3.59802
fam169aa	-3.59704
si:dkey-54n8.2	-3.56036
hs6st1b	-3.53116
CABZ01064941.1	-3.48164
histh1l	-3.40205
si:dkey-12l12.1	-3.38965
zfyve28	-3.37344
zgc:153372	-3.37235
cyp2p7	-3.35969
CR628331.1	-3.34034
itga2.3	-3.33847
slc22a16	-3.32945
hsp70.1	-3.30054
efnb2a	-3.29228
ophn1	-3.2529
cpvl	-3.24069
gpx1a	-3.21593
hsp70l	-3.21363
ARSB	-3.21094
bhlhe41	-3.19321
crim1	-3.16601
surf6	-3.1179
cdipt	-3.11542
hip1	-3.0671
lipg	-3.03949
prmt1	-3.01757
mdm4	-2.96851
prkag2a	-2.95481
hsph1	-2.95221
pbx2	-2.94149
ccnt2a	-2.93203
hsd17b8	-2.92358
psma6l	-2.91593
sorl1	-2.91435
tusc2a	-2.90979
txnl4a	-2.89209
larp4ab	-2.85727
wasla	-2.84339
sfswap	-2.83792
sparc	-2.82673
ext1a	-2.80341
tmub2	-2.80173
selenbp1	-2.78028
klf9	-2.77631
hax1	-2.76488
ERCC-00053	-2.75937
kmt2ba	-2.75834
dcaf7	-2.75584
si:ch211-212k18.8	-2.75261
arpc5la	-2.71118
rc3h1b	-2.69806
mov10a	-2.69647
zgc:113232	-2.68783
ERCC-00145	-2.67739
ak4	-2.65236
p4ha1b	-2.64237
CR392002.1	-2.63309
sirt1	-2.63049
akt1s1	-2.61807
mlc1	-2.614
appb	-2.61377
cyr61l2	-2.60358
kank1a	-2.59985
foxa3	-2.58885
bms1	-2.5739
dap1b.1	-2.56071
si:dkey-201c13.2	-2.55292
krr1	-2.5322
selt1b	-2.52134
id1	-2.51475
cyp2ad3	-2.51356
ing5a	-2.50145
mmd	-2.49904
MCRIP2	-2.49095
prpsap2	-2.48402
lpin1	-2.47938
nubp2	-2.47871
slc7a5	-2.4731
fgfr4	-2.46131
sort1a	-2.45931
gpr108	-2.45736
smc1al	-2.44835
ndufa10	-2.44388
sult6b1	-2.43806
pkd1a	-2.43513
SNORA26.1	-2.42773
sgcd	-2.42365
irf7	-2.4178
cirbpa	-2.41037
ppp2r2ab	-2.40622
psmg2	-2.4041
lrrc8da	-2.40143
egf	-2.39134
srsf9	-2.37789
stat6	-2.35212
ptgs2b	-2.35004
csnk1g2a	-2.34503
hsp70.2	-2.34156
hnrnpa0a	-2.34098
si:ch211-212k18.9	-2.33897
abcc6a	-2.33024
slc5a3b	-2.32567
pik3r2	-2.31335
gid8b	-2.29776
bmpr1aa	-2.2966
tfam	-2.2944
pigr	-2.28732
micu2	-2.28562
pfkfb4b	-2.28384
nup62l	-2.28261
rassf2a	-2.27794
sec61a1	-2.26729
hsp90aa1.2	-2.2634
gpx4a	-2.26272
hpcal1	-2.25028
epha7	-2.2465
cat	-2.24619
disp1	-2.23655
AL929435.1	-2.23647
papd5	-2.22239
glulb	-2.22178
acy3.2	-2.22136
tab1	-2.22119
aagab	-2.21927
si:dkey-6n6.1	-2.21512
creb5b	-2.21011
zgc:174888	-2.20888
sdr16c5a	-2.20519
gulp1a	-2.20062
fam46bb	-2.19941
vps41	-2.19491
itgb1b.2	-2.19488
hs3st3b1b	-2.19312
creb3l2	-2.19196
CABZ01029366.1	-2.18903
sdad1	-2.18495
arid1aa	-2.18041
ptmab	-2.17643
itpka	-2.17538
mafk	-2.17364
osbpl9	-2.16198
ppid	-2.15577
agpat2	-2.14954
nacc1a	-2.14534
mycn	-2.13972
CR387996.1	-2.13192
tbc1d23	-2.12994
si:ch73-233k15.2	-2.12855
creb1a	-2.12576
map3k1	-2.1227
u2af2a	-2.12227
dnajb1b	-2.11933
mbpa	-2.11801
ppp1caa	-2.10823
kmt2d	-2.10788
slc25a42	-2.10625
rbp5	-2.1044
kmt2ca	-2.10279
glsb	-2.10249
BX936308.2	-2.09849
CU693368.2	-2.09634
ctgfa	-2.09576
arhgef18b	-2.08747
cpn1.1	-2.08459
atp2c1	-2.0832
sfrp5	-2.08138
btbd6b	-2.07522
plagx	-2.06881
kat5a	-2.06743
zgc:158564	-2.06379
tspan4a	-2.0618
ptgs2a	-2.06071
copg2	-2.05768
ahctf1	-2.05262
zgc:171679	-2.04548
THBS1	-2.04236
prss35	-2.03402
ndrg2	-2.03121
BX936397.2	-2.02685
asf1bb	-2.02385
si:ch73-23l24.1	-2.02151
kif5ba	-2.01735
tax1bp1b	-2.01619
slc7a3a	-2.01383
ms4a17a.9	-2.01378
zfand2a	-1.9992
pnp5b	-1.99455
nav3	-1.99236
agtrap	-1.99047
phactr4a	-1.98591
sav1	-1.9842
alg2	-1.97512
SLC3A2	-1.97483
zgc:114130	-1.97041
klf11a	-1.96572
hsp70.3	-1.96051
bckdhb	-1.95853
ing4	-1.95469
dmd	-1.95055
stag2b	-1.94853
midn	-1.94822
wdr62	-1.94622
igfbp5b	-1.94616
etv5a	-1.94376
fosab	-1.94238
slc6a22.1	-1.9404
lrp1aa	-1.93946
mrpl30	-1.93629
slc43a1a	-1.93193
MNT	-1.93184
CABZ01086296.1	-1.92808
cyp2ad6	-1.92383
khdrbs1b	-1.91753
fbp1a	-1.90975
si:dkey-42i9.4	-1.90577
itgb1b.1	-1.9019
yipf6	-1.89915
pde4ba	-1.89378
acot15	-1.88823
tmbim4	-1.88424
2002-09-01	-1.88203
celf1	-1.87438
aff2	-1.86786
ube2al	-1.8599
CU539058.1	-1.85946
zmiz1a	-1.85211
col11a2	-1.84959
c19h1orf109	-1.84835
zfand5b	-1.84774
swap70b	-1.84496
avpr1aa	-1.84436
gnmt	-1.83852
aamp	-1.83476
trioa	-1.83126
kansl1b	-1.82749
CU469577.1	-1.82679
slc3a2b	-1.82294
angptl4	-1.82204
mief2	-1.82103
tmem2	-1.81282
fndc3ba	-1.81132
cebpz	-1.81027
plod1a	-1.80776
nfil3-6	-1.80401
spty2d1	-1.80215
ppp4r2b	-1.79934
map4k5	-1.7992
clic4	-1.79642
itpkcb	-1.79588
snapc5	-1.79557
sf3b3	-1.79223
ssh2a	-1.79156
ms4a17a.11	-1.78947
col9a3	-1.78873
vgll2b	-1.78663
sepn1	-1.7856
rsrp1	-1.77993
nsa2	-1.77841
ptbp1b	-1.76531
CR936321.1	-1.76507
tmem263	-1.76452
foxp4	-1.76028
btf3	-1.75506
zgc:103697	-1.74489
SLC27A2 .1	-1.7426
zgc:85975	-1.74044
gcsha	-1.73719
fosl1a	-1.73405
tnksb	-1.73166
calm3a.1	-1.72156
cdc25b	-1.72009
crabp2a	-1.72001
psme4b	-1.71819
eif1axa	-1.71794
col9a1b	-1.71527
zgc:112982	-1.71518
letmd1	-1.71517
hbp1	-1.71347
si:ch211-161c3.6	-1.71261
SENP1	-1.70625
tdh	-1.70277
eif4e2rs1	-1.70169
spry2	-1.70141
fam110c	-1.6978
rab1ba	-1.69726
hspb1	-1.69685
dap1b	-1.69308
tuft1b	-1.68815
h3f3a	-1.68575
BX470185.1	-1.68319
si:dkey-6n21.12	-1.68165
COX7A2	-1.68109
sept8b	-1.67321
CU929418.2	-1.6664
fam101b	-1.66509
arih1	-1.66199
nckap1	-1.661
chad	-1.66032
cul3a	-1.65667
slc25a36a	-1.65608
pbx4	-1.65225
ctdsp1	-1.64983
hoxb5a	-1.64874
sec61a1l	-1.6466
nedd8	-1.64645
arl5c	-1.63837
syncrip	-1.63511
jdp2b	-1.63378
fkbp11	-1.63351
ptdss1a	-1.63327
rfx2	-1.63193
txndc12	-1.62752
snrnp48	-1.62739
scube2	-1.62585
cry5	-1.62449
prnprs3	-1.62321
sh3bp5b	-1.62286
tcf7l1b	-1.61807
nr4a1	-1.6166
si:dkey-31g6.6	-1.60507
pik3r1	-1.60447
cebpd	-1.60347
si:ch211-202a12.4	-1.60027
tcf3b	-1.59941
tle3a	-1.59883
arhgap35a	-1.59174
si:dkey-78l4.14	-1.5916
ythdf2	-1.59032
pwwp2a	-1.58688
znf703	-1.58356
lsm12a	-1.58348
zmp:0000000760	-1.58212
gmps	-1.58156
emp2	-1.57822
camk2g2	-1.57812
zgc:171775	-1.57761
mtfr1	-1.57724
fkbp5	-1.57601
rhbdf1a	-1.57424
BX901920.1	-1.5733
purba	-1.56323
ppme1	-1.55957
si:dkeyp-87e7.4	-1.55814
si:dkeyp-120h9.1	-1.55739
CR383668.3	-1.55606
BX663519.1	-1.55408
nol7	-1.55394
H2AFX .7	-1.55333
cart3	-1.55181
hnrnpua	-1.55101
clcn5b	-1.54884
snrkb	-1.54773
zgc:162939	-1.54582
cdkn1ca	-1.54141
uggt1	-1.54052
ube3a	-1.53883
ucmab	-1.53778
MYO1D	-1.53747
lmo4a	-1.53734
DNAJA4	-1.53634
ctdspla	-1.53526
slc43a2b	-1.53251
scaf11	-1.52974
mmp17a	-1.52659
med7	-1.52235
adgre10	-1.52087
sema3fb	-1.51435
ier2a	-1.5138
CR538726.1	-1.51202
nol12	-1.50847
per1a	-1.50454
ctgfb	-1.50088
si:ch211-66k16.27	-1.49697
xpc	-1.49572
ptbp1a	-1.49462
si:ch73-375g18.1	-1.49396
ulk2	-1.49084
igf2bp1	-1.48924
epha4a	-1.48833
cab39l1	-1.48829
ugt8	-1.4878
ccnb2	-1.48541
cdo1	-1.48123
bzw1a	-1.48121
lamtor2	-1.47978
tra2a	-1.47888
acp2	-1.4766
abi1a	-1.47083
shha	-1.47003
cald1a	-1.46831
slain2	-1.46554
zgc:194221	-1.46421
tk2	-1.46416
ERCC-00042	-1.46177
zgc:153952	-1.45265
srsf3a	-1.45068
fkbp4	-1.44937
arpc5lb	-1.44916
ppm1k	-1.44786
cyp27c1	-1.44664
cth	-1.44493
CABZ01068358.1	-1.44171
si:dkey-79d12.5	-1.44065
reps1	-1.4396
cish	-1.43842
BX005438.1	-1.43814
ywhabl	-1.43523
wsb1	-1.43361
cbx3a	-1.43313
si:ch211-235e9.8	-1.43308
r3hdml	-1.43227
si:ch73-86n18.1	-1.42876
sltm	-1.42727
psmc3	-1.42676
vclb	-1.42511
ctcf	-1.42431
hprt1	-1.42112
proza	-1.42088
pomt1	-1.41933
sfpq	-1.41603
TMEM19	-1.41507
lxn	-1.41252
znrf3	-1.4118
si:dkey-202l16.5	-1.41162
arhgef28	-1.41063
ptges3a	-1.40971
zranb2	-1.4075
zgc:56525	-1.40455
slc25a24	-1.40169
nhsl2	-1.40028
mast2	-1.39758
bmpr1ab	-1.3968
atp2a3	-1.39324
znf207a	-1.38922
hvcn1	-1.38635
farsb	-1.38272
trmt61a	-1.38251
vapal	-1.38244
stk3	-1.3815
ints6	-1.38008
igf2bp2b	-1.37823
col9a2	-1.37562
slit3	-1.36893
anxa13	-1.3678
flrt2	-1.36696
dusp6	-1.36648
rbm25a	-1.36408
trmt6	-1.36397
clasrp	-1.3623
wasb	-1.36084
cux1a	-1.36041
aldocb	-1.35827
ptenb	-1.35302
si:dkey-234i14.3	-1.34903
sulf1	-1.34865
nog3	-1.34789
ubxn7	-1.34774
G3BP2	-1.34606
fstl1a	-1.34454
nob1	-1.34018
rdh12	-1.33898
polr2a	-1.33533
COLGALT2	-1.33316
spen	-1.33222
serpina10a	-1.33186
ppan	-1.33124
ivns1abpa	-1.33093
cnpy4	-1.32947
hsf2	-1.32863
krt15	-1.32813
tgfbr1a	-1.32577
zgc:154058	-1.32521
myca	-1.32401
serf2	-1.32146
mfsd2ab	-1.32079
loxl1	-1.31808
srsf6b	-1.31585
FP074902.3	-1.31048
si:ch211-243g18.2	-1.30947
APH1A	-1.30767
ldha	-1.30708
erbb2ip	-1.30371
kdelr2b	-1.30102
rerea	-1.29854
rbp4	-1.29646
ndel1b	-1.29483
fhod1	-1.29463
marcksl1a	-1.29406
usp2b	-1.29239
rbms2b	-1.29236
paics	-1.29124
AL840638.1	-1.29115
rab2a	-1.2854
ackr3b	-1.28505
serpinh1b	-1.28323
wnk1b	-1.28226
dpys	-1.28141
epyc	-1.28095
hcar1-4	-1.27932
prelid3b	-1.27866
tmem237b	-1.27854
CABZ01057955.1	-1.27793
fbxw11a	-1.27206
eif4ebp3l	-1.27124
esama	-1.26675
ccdc186	-1.26254
ep300a	-1.25862
slc39a1	-1.25642
fam162a	-1.25373
si:dkey-1j5.4	-1.24972
ccz1	-1.24919
snx1a	-1.2483
mafba	-1.24816
chka	-1.24694
atf6	-1.24621
CR388052.1	-1.24527
derl1	-1.24519
napab	-1.24469
lsm14aa	-1.24366
elovl6	-1.24237
si:dkey-163m14.2	-1.24141
snw1	-1.24025
slc38a2	-1.23971
CR392003.3	-1.23954
eif4a1a	-1.23834
atxn2	-1.23823
prdx4	-1.23255
rpf1	-1.23167
tob1a	-1.22927
prkar1aa	-1.22926
nsd1a	-1.22504
mmp23bb	-1.22322
ube2h	-1.2209
fosb	-1.22054
itga6a	-1.21761
mrpl16	-1.21697
hsdl2	-1.21614
usp7	-1.21528
mfsd13a	-1.21299
glo1	-1.21216
CU467861.1	-1.21075
kdm7aa	-1.20504
eif4ebp3	-1.20299
flnbl	-1.20083
AK6	-1.19996
pfn2l	-1.1939
si:ch1073-184j22.1	-1.19368
ncoa3	-1.19306
ptmaa	-1.19222
mrps6	-1.19148
mtss1	-1.19054
aldob	-1.18933
lonp1	-1.18839
cpeb4b	-1.18823
banf1	-1.18586
rarga	-1.18403
hspe1	-1.18382
AC024175.17	-1.18157
ppp2r5eb	-1.17839
romo1	-1.1767
azin1b	-1.1755
arcn1a	-1.17444
usp36	-1.17392
hsd11b2	-1.16989
nrarpa	-1.16554
pdcl	-1.16232
cdkn1d	-1.16178
phf23b	-1.16165
mark2a	-1.16147
atf5b	-1.16094
gdnfa	-1.15816
nop53	-1.15479
hnrpdl	-1.15424
shoc2	-1.15232
col11a1a	-1.15215
retreg3	-1.15164
tardbpl	-1.15012
asna1	-1.14838
nucks1a	-1.14536
utp18	-1.14496
men1	-1.1434
pum3	-1.14327
tmtc1	-1.14243
lmo7a	-1.14098
si:dkey-93m18.3	-1.14064
ERCC-00003	-1.1402
col2a1a	-1.14001
ppig	-1.13983
CR354588.1	-1.13954
cers5	-1.13817
gtf3c3	-1.13627
si:ch211-178n15.1	-1.13561
spon1b	-1.13545
EIF1B	-1.13368
sepp1a	-1.13288
CABZ01117753.1	-1.13246
nfil3-5	-1.13184
rapgef2	-1.13135
vstm4a	-1.12661
p4hb	-1.12387
mycb	-1.12152
ubtf	-1.11646
acvr2aa	-1.11131
hnrnpa1b	-1.1098
zgc:153911	-1.10901
nop10	-1.10818
golim4b	-1.1073
DDX17	-1.10648
si:dkey-20i20.2	-1.10389
CR388143.2	-1.10335
ppp6c	-1.10225
mgst3a	-1.09879
rnf11a	-1.09306
sik1	-1.09125
ddit4	-1.08903
mdka	-1.08781
tmcc3	-1.08777
sik2b	-1.08703
cdc40	-1.08574
bzw1b	-1.0844
grb10a	-1.08433
f3b	-1.08424
camsap2b	-1.08421
pmp22a	-1.0839
pank4	-1.08215
ssr2	-1.0818
stat1a	-1.07965
schip1	-1.07945
ctu2	-1.07717
ldlrap1a	-1.07692
cdkn1a	-1.07513
tnfaip2a	-1.0748
rasl11b	-1.07294
vps4b	-1.07117
slc38a5a	-1.07002
CT583727.1	-1.06855
cybrd1	-1.06689
dnajb6b	-1.06539
lonrf1l	-1.06382
slit2	-1.06375
fam207a	-1.06326
slc7a3b	-1.06134
arhgef1b	-1.05917
elavl1	-1.05842
zgc:153631	-1.05181
mmp9	-1.05152
gapdh	-1.05033
ssrp1a	-1.04984
prps1b	-1.04937
cicb	-1.03985
pbxip1b	-1.03615
maea	-1.03325
zgc:91976	-1.03318
tppp3	-1.03054
hspa4a	-1.02726
fam3c	-1.02633
slc43a2a	-1.02462
hnrnpa0l.1	-1.02129
dnaja2	-1.02107
ca2	-1.01658
tex261	-1.0149
gse1	-1.01362
smad3a	-1.01319
puf60b	-1.01231
ston2	-1.0096
ube2l3a	-1.00668
cldn5a	-1.00506
si:dkey-19b23.8	-1.00316
hnrnpabb	-1.00194
ncl	-1.00063
epb41l3b	-1.00057
knop1	-0.998095
uba52	-0.996836
si:ch73-1a9.3	-0.994027
rad23b	-0.993971
ube2g2	-0.993863
RIN2	-0.993527
CU915827.1	-0.988928
dbpb	-0.987944
bglap	-0.986365
vdrb	-0.984641
larp4b	-0.984378
her6	-0.984095
GABARAPL1	-0.983881
CABZ01076616.1	-0.983786
tgfb3	-0.983534
nid1a	-0.982488
mier3b	-0.982224
cnpy1	-0.982133
eif3f	-0.98203
kpnb1	-0.978824
tmem54a	-0.978591
notch2	-0.977731
hdlbpa	-0.977493
rdh10b	-0.976323
srrm2	-0.975123
eif4enif1	-0.970993
si:ch211-108d22.2	-0.969764
CR855389.3	-0.969558
ERCC-00060	-0.968915
gcn1	-0.968684
hist2h2l	-0.968187
suds3	-0.966945
oaz1a	-0.966634
nkd1	-0.966045
cux1b	-0.962776
impdh1b	-0.96242
atf7ip	-0.961841
rbm39a	-0.961235
furina	-0.960844
rtca	-0.960308
grasp	-0.959292
etfb	-0.956754
chd9	-0.956708
pon2	-0.955523
abcc5	-0.954446
FO834814.2	-0.952595
gadd45aa	-0.950683
si:dkey-253i9.4	-0.949454
btg2	-0.949384
kat2a	-0.9488
CABZ01113599.1	-0.948475
zgc:153993	-0.945797
tmem154	-0.944961
rtcb	-0.944875
eif2b1	-0.944693
gadd45gip1	-0.94331
rgmd	-0.943154
lsm10	-0.943118
hnrnpa0b	-0.942276
srsf1a	-0.94187
slc38a9	-0.941298
papss2b	-0.940992
chchd2	-0.939741
mkrn4	-0.937347
trip11	-0.936956
creb1b	-0.93675
efna1b	-0.936529
BX571811.1	-0.931368
emc7	-0.930071
krt17.1	-0.928137
tnrc18	-0.927893
acp6	-0.927325
npr3	-0.926799
CABZ01078244.2	-0.922475
dlc1	-0.9214
dph3	-0.917419
bod1l1	-0.916879
skilb	-0.916265
cib1	-0.914959
klf7b	-0.914902
mrps25	-0.91381
CIB1	-0.912444
CU929521.2	-0.908349
igf2bp3	-0.907692
ak2	-0.90721
srsf5a	-0.906751
chd3	-0.905947
usp2a	-0.905178
rpl36a	-0.903095
odc1	-0.902751
foxo3b	-0.902185
fzd7b	-0.902096
BX005329.2	-0.901196
cox17	-0.900944
cnbpb	-0.899471
flna	-0.898544
ahcy	-0.89756
FP085398.1	-0.894081
amotl2a	-0.893266
mfap3l	-0.891617
gstz1	-0.891497
si:ch73-211l13.2	-0.887314
dnm1l	-0.886558
top1l	-0.883271
pole3	-0.879928
SGPP1	-0.879834
BX005183.3	-0.878522
CR790382.3	-0.878248
ERCC-00004	-0.877444
SSBP4	-0.873981
amot	-0.873279
pabpc1b	-0.873212
smad7	-0.873142
cyp2ad2	-0.872699
gstr	-0.870499
si:ch211-282b22.1	-0.870415
cul3b	-0.869286
csrnp1a	-0.868284
smim13	-0.867545
dhrs3a	-0.866707
hyal1	-0.866329
tcf3a	-0.865435
ta	-0.865072
npm1a	-0.864757
BX571880.1	-0.86458
fam13a	-0.862835
BX510989.1	-0.862797
cirbpb	-0.861908
ppfibp1b	-0.861457
fam32a	-0.858796
BX323060.3	-0.85794
vamp3	-0.854863
trib2	-0.853276
CR385078.5	-0.852136
tjp1b	-0.851206
agpat5	-0.850773
sumo1	-0.850281
sh3kbp1	-0.849476
tsc22d2	-0.849076
qkia	-0.846133
znf1152	-0.844912
si:ch211-57i17.2	-0.84462
fbrsl1	-0.84243
hmgb1a	-0.841567
tpm4a	-0.836133
ccnt2b	-0.830422
si:ch211-221f10.2	-0.830229
zgc:123010	-0.829894
znf1122	-0.82941
rps27.1	-0.829333
antxr2a	-0.8282
nap1l1	-0.82731
wu:fb55g09	-0.824751
sema4c	-0.820713
fxr2	-0.819629
mcl1b	-0.817902
si:dkey-174i8.1	-0.817152
lhfp	-0.816847
gsk3b	-0.813889
rpl23a	-0.81384
brwd1	-0.813769
uqcrb	-0.813148
cdc42ep3	-0.812296
msx1a	-0.812141
cyp2p8	-0.812016
nup98	-0.809231
wdr5	-0.807087
dyrk1ab	-0.80655
birc6	-0.804879
setd1ba	-0.804525
hnrnpa1a	-0.803745
fstl1b	-0.802099
nr1d2a	-0.800322
mmadhc	-0.799617
chac1	-0.798288
BX470116.1	-0.797226
sgut1	-0.797201
ncalda	-0.795611
CABZ01063790.1	-0.795406
luc7l	-0.794661
cmn	-0.793849
AL732488.1	-0.793118
erh	-0.790644
papola	-0.790067
eif5b	-0.788762
cdkn1cb	-0.786492
hnrnpm	-0.785576
dnajb12b	-0.784693
gtf2h5	-0.783369
cct4	-0.782879
CABZ01058650.1	-0.781974
arf1	-0.781467
snu13b	-0.781307
adh5	-0.780551
rin2	-0.779866
tmem106a	-0.778545
si:dkey-93m18.4	-0.777206
naa50	-0.776681
taf13	-0.776326
nip7	-0.775931
lect1	-0.775393
zgc:113208	-0.775036
cx30.3	-0.774231
AC024175.19	-0.772926
slc4a2b	-0.772177
znf1009	-0.77199
CR392003.2	-0.770247
zgc:175088	-0.770123
ggps1	-0.766241
sema4ba	-0.761237
snrpd3l	-0.761159
fkbp14	-0.760483
frmd6	-0.760046
gtpbp4	-0.757925
srp9	-0.757119
smarcb1a	-0.756636
calua	-0.756363
cox4i1	-0.748386
id3	-0.745472
pcf11	-0.745082
trim8a	-0.74344
arid3a	-0.742334
si:ch1073-170o4.1	-0.741141
si:dkey-19a16.7	-0.741093
BX530017.2	-0.740135
mat2al	-0.740075
prodha	-0.739699
BX571811.2	-0.738061
SERP1	-0.737427
phldb2b	-0.737242
cycsb	-0.736853
znf346	-0.736019
BX957326.1	-0.734597
ngrn	-0.733116
msi2b	-0.732879
BX247877.1	-0.732092
ERCC-00074	-0.73022
cdca4	-0.729811
mt-atp8	-0.728907
BX927396.1	-0.728622
cdkn1bb	-0.726013
cldnb	-0.725927
suz12a	-0.725834
bcl2l1	-0.72324
hoxc3a	-0.72324
tcf7l2	-0.72251
b4galt4	-0.722212
setb	-0.720117
eif3d	-0.720024
hexim1	-0.718474
mknk2b	-0.717508
dusp2	-0.717443
atpaf1	-0.717161
ankrd13c	-0.715498
gstm.3	-0.714881
itih6	-0.714726
imp4	-0.713966
FP089511.1	-0.713137
vamp5	-0.711461
sh3bp5la	-0.710942
iscub	-0.709958
pnpla2	-0.709055
zmynd19	-0.708249
dpy30	-0.707695
drg2	-0.706678
nkap	-0.70633
higd1a	-0.706029
ERCC-00130	-0.705991
brd1b	-0.705957
BX511128.3	-0.704891
hif1al	-0.702477
ginm1	-0.701351
wwp2	-0.700209
eif3c	-0.698258
glrx5	-0.697904
mkxa	-0.697835
wls	-0.697666
CABZ01012866.1	-0.697486
CR388369.1	-0.697196
acot14	-0.697056
Sep-15.1	-0.696444
cpne1	-0.696094
BX890576.1	-0.696094
mthfs	-0.695751
mknk2a	-0.694656
lman2lb	-0.694187
tceb2	-0.694127
sema6dl	-0.693473
aco1	-0.692351
MAF1	-0.692263
ss18	-0.691884
ciapin1	-0.6901
psme3	-0.68991
nrbf2b	-0.689871
ptpn21	-0.688915
cnot8	-0.688266
esrra	-0.687654
ppp2r5ea	-0.687052
tmed9	-0.686877
acsl4b	-0.686259
mfge8b	-0.685442
si:dkey-27b3.2	-0.684879
ncor2	-0.682689
zgc:162944	-0.682488
myo1cb	-0.682311
kras	-0.681877
ipo7	-0.679766
sumo3b	-0.679406
creg2	-0.678609
tnfaip1	-0.677636
sec63	-0.676447
anxa11b	-0.672178
cited4b	-0.671788
kdm7ab	-0.671431
fzd7a	-0.66969
si:ch211-40k21.5	-0.668983
cdkn1ba	-0.668503
CR933734.2	-0.667909
prmt5	-0.667542
BX276122.1	-0.667403
qpctla	-0.667386
slc3a2a	-0.665459
cers2a	-0.664898
AC024175.3	-0.659996
fubp1	-0.658663
rpl35	-0.657453
ehd2b	-0.656796
szrd1	-0.656328
ralgapa1	-0.655417
tnika	-0.655054
srprb	-0.654486
mylpfa	-0.651905
5S_rRNA.820	-0.648221
tsr2	-0.648171
gsto2	-0.647359
sgms1	-0.645659
fam60al	-0.644213
matn4	-0.642376
idh2	-0.642155
hiat1b	-0.641208
si:dkey-28k24.2	-0.63962
traf4a	-0.639492
ppp2r5b	-0.639221
mgst1.2	-0.639141
mt-nd2	-0.638573
rps7	-0.638268
dcaf11	-0.637817
AL954134.1	-0.637423
BX546499.2	-0.636925
slc35d1b	-0.636813
SNORD70	-0.636254
mrpl57	-0.636017
prdx3	-0.634553
adkb	-0.63442
evi5b	-0.633994
igf1rb	-0.63246
rps13	-0.632165
snap23.1	-0.631961
gpr137c	-0.631757
dlg5a	-0.631532
rbm4.3	-0.628315
rnd3b	-0.626593
mat2ab	-0.626075
atg12	-0.625781
pla2g7	-0.623848
anxa11a	-0.623156
pudp	-0.622816
slc35e1	-0.622689
FLNB	-0.621891
tma7	-0.620078
ptger1b	-0.619932
ola1	-0.618224
dnajc3a	-0.617696
prtfdc1	-0.616314
BX072533.1	-0.616218
pdap1b	-0.615756
mrto4	-0.615082
rpl24	-0.613467
xbp1	-0.613363
mmp13a	-0.613307
ccnd1	-0.612593
rars	-0.611608
acsf2	-0.610758
znf865	-0.610001
gstt1a	-0.609474
si:ch211-196c10.15	-0.608045
pef1	-0.607881
zgc:195170	-0.607702
si:ch73-141c7.1	-0.607525
ska2	-0.606807
flii	-0.606391
sept8a	-0.606188
cox6a1	-0.606016
slc25a51b	-0.605903
2010-09-01	-0.60544
slit1a	-0.602915
PRRC2B	-0.602853
rai14	-0.600796
tnk2b	-0.600136
irx3a	-0.597592
cmc2	-0.597572
CR759927.4	-0.597038
lpar1	-0.596806
rbm19	-0.595306
ubap2l	-0.594151
ankrd10b	-0.594137
SNORA81	-0.593586
si:ch211-87h14.3	-0.592896
trib3	-0.592389
ERCC-00009	-0.59193
galnt1	-0.591214
slc25a15a	-0.590729
palm2	-0.590047
mb	-0.589329
myh10	-0.589115
CABZ01038697.1	-0.589081
si:ch73-376l24.3	-0.588194
AL954715.1	-0.587767
gsap	-0.587518
eprs	-0.587453
acin1b	-0.585274
myo10l3	-0.585204
faim2a	-0.585197
noxo1b	-0.584532
pdap1a	-0.584316
si:dkey-3p4.8	-0.582874
nr1h3	-0.582755
c23h20orf24	-0.58167
irx5a	-0.581597
csnk1da	-0.579659
ust	-0.577839
lrig2	-0.577726
ssr3	-0.577725
rnf38	-0.577242
per3	-0.577101
rbms1a	-0.576384
ube2v2	-0.576032
AL929057.1	-0.573947
PRIMA1	-0.573634
scamp2	-0.573575
smg6	-0.573552
hgh1	-0.573531
pknox1.2	-0.57178
h3f3d	-0.571707
pdcd4b	-0.571158
eif4ea	-0.570495
farp1	-0.568448
casc3	-0.567812
kdm1a	-0.567037
kctd12.2	-0.566842
CT027702.1	-0.566517
sarnp	-0.565182
hivep1	-0.564673
hrasb	-0.564614
snrpd1	-0.564164
slc6a16b	-0.563851
tsc22d3	-0.563377
zgc:77158	-0.56303
thoc2	-0.562601
mapk6	-0.562389
CR848025.1	-0.56141
birc2	-0.561357
zgc:66474	-0.561246
srp54	-0.561056
sox5	-0.560451
limch1b	-0.560151
brd1a	-0.558487
amd1	-0.558155
coq10b	-0.557721
pcna	-0.556776
lmod1a	-0.556219
zfyve21	-0.554488
dvl2	-0.553384
erfl3	-0.552603
spon2a	-0.55197
pwwp2b	-0.551193
tox2	-0.550537
tcf25	-0.550484
snrpf	-0.550305
ERCC-00171	-0.549913
tmpoa	-0.549882
serpine3	-0.547257
ccnl1b	-0.546913
cep85	-0.546861
sox9b	-0.546548
phf20b	-0.545391
hug	-0.544743
CT573256.1	-0.544446
galnt2	-0.54419
ERCC-00022	-0.543936
supt6h	-0.543878
zswim5	-0.543202
AC024175.2	-0.54316
fam213b	-0.542309
mxd4	-0.542198
stat3	-0.542152
fbxo11a	-0.541965
rab11a	-0.540146
cyb561d2	-0.539024
ghra	-0.538633
nocta	-0.537189
dhx36	-0.536523
ash1l	-0.536062
tlr5b	-0.535914
plce1	-0.535783
cops4	-0.535326
si:ch211-286b5.5	-0.534936
atp2b1a	-0.534746
adka	-0.533932
pak2a	-0.533922
krt92	-0.532719
PLOD3	-0.532569
eif4bb	-0.532295
si:ch211-209l18.4	-0.53208
CABZ01049925.1	-0.531772
lmnb2	-0.531322
cygb1	-0.530744
si:dkey-93m18.6	-0.530553
cd276	-0.530391
pttg1ipb	-0.530056
pleca	-0.529869
eif1b	-0.528894
id4	-0.528669
ERCC-00108	-0.528643
cdk1	-0.5277
uchl5	-0.526345
cd82b	-0.525977
aim1a	-0.525635
RPL37A	-0.525585
get4	-0.525474
psma8	-0.52451
prkx	-0.524065
pafah1b1b	-0.524013
si:ch211-238e22.4	-0.523835
eif2s1a	-0.52364
sh3gl2a	-0.522267
rps6ka3a	-0.521122
anxa3b	-0.521078
ahr2	-0.521041
GPATCH2	-0.520924
dzip1	-0.520674
tns1b	-0.520402
eif4a3	-0.519925
rrbp1b	-0.519923
pcdh19	-0.519365
rb1cc1	-0.519358
CU655820.1	-0.518635
upf1	-0.518561
CR392003.1	-0.517384
phka2	-0.517067
cyr61	-0.516864
si:dkey-4c15.8	-0.514914
BX322618.1	-0.514704
ano5a	-0.51349
slc25a25a	-0.512547
bcas2	-0.512176
rpl38	-0.512174
wnt4b	-0.512108
kri1	-0.511213
si:ch211-286o17.1	-0.511058
chmp1b	-0.510551
mapkbp1	-0.510206
b3gnt5a	-0.509982
ifrd2	-0.50882
ppm1bb	-0.508619
si:dkey-67c22.2	-0.507687
BX571945.2	-0.506124
dixdc1a	-0.503623
slc39a13	-0.503595
golga7	-0.502965
zdhhc4	-0.502339
nifk	-0.502328
h2afvb	-0.501106
SLC5A10	-0.500056
atp5ia	-0.50002
atxn3	-0.500006
tefa	-0.499896
zgc:174906	-0.499881
pxnb	-0.499849
sf3b6	-0.499844
BX470200.2	-0.499348
si:ch211-212k18.4	-0.498927
bbip1	-0.498597
ankrd12	-0.498028
CR626866.2	-0.497433
mt-nd6	-0.497275
zgc:123105	-0.497166
trnau1apb	-0.497132
znf1174	-0.496433
rpl23	-0.495661
tnpo2	-0.49556
skib	-0.494776
ralgapa2	-0.493328
TSC2	-0.49168
cilp	-0.491293
zgc:113307	-0.489843
echs1	-0.489531
magoh	-0.489495
im:7152348	-0.489176
CR391908.1	-0.487858
cbx2	-0.487632
zgc:110688	-0.487118
ets2	-0.48626
ip6k2a	-0.485395
ylpm1	-0.484689
prdm10	-0.484658
pisd	-0.483289
anks3	-0.482686
id2a	-0.482374
fbxo45	-0.482059
tmem184ba	-0.481864
camsap1b	-0.481525
ccl19a.1	-0.480735
acox1	-0.479639
h1fx	-0.479513
tomm5	-0.478404
wisp2	-0.477949
fam133b	-0.477305
ldlra	-0.476263
ERCC-00136	-0.476215
rps26l	-0.474261
foxo4	-0.474203
phf12a	-0.474121
hspbp1	-0.473065
bhmt	-0.472912
zgc:77056	-0.472787
itfg1	-0.472333
rhbdd1	-0.472266
rpl39	-0.47135
gas8	-0.47068
b2ml	-0.470355
si:ch211-79l17.1	-0.469752
nolc1	-0.469193
rnf10	-0.468988
CR450686.1	-0.46662
wfdc2	-0.466548
arrdc2	-0.466392
mCherry_cds	-0.466258
ERCC-00113	-0.466219
wif1	-0.464904
arl4ca	-0.464453
cgref1	-0.463461
myo1ea	-0.463272
mt-nd1	-0.462236
CU571318.1	-0.461416
tnrc6c2	-0.461263
si:ch211-39i22.1	-0.45973
ism1	-0.458952
si:ch211-120e1.7	-0.458788
dhx15	-0.458442
RPL41	-0.45837
zgc:158257	-0.458268
gpc5a	-0.458257
UBA6	-0.457982
etf1b	-0.457253
dazap2	-0.456658
cbx8b	-0.455978
tnc	-0.455824
map1lc3b	-0.455334
atp1a1b	-0.454953
sytl3	-0.454871
zc3h11a	-0.454366
brpf3a	-0.453656
lrrc58b	-0.453231
nrd1a	-0.452894
RABGAP1	-0.451413
coasy	-0.450985
FO818671.1	-0.450625
errfi1b	-0.44982
tmem30aa	-0.449639
nop58	-0.449004
zgc:110339	-0.448869
tcf7l1a	-0.448854
CABZ01089907.1	-0.448836
eif4g2b	-0.448013
fam117bb	-0.44788
caprin1b	-0.447583
SLC7A1	-0.447454
dcun1d3	-0.447125
nlk1	-0.446702
BX284666.1	-0.445358
eif2b2	-0.445329
eif4a1b	-0.445
slc38a5b	-0.44387
ino80	-0.443635
nr2f5	-0.442682
AC024175.20	-0.43876
phrf1	-0.437696
naca	-0.437522
rps14	-0.437321
rrp12	-0.436254
fam102ab	-0.434705
ubb	-0.434466
ghrb	-0.434176
BX664716.1	-0.433554
dusp8a	-0.433185
BX572078.5	-0.432923
si:dkey-112g5.13	-0.432425
fahd2a	-0.4324
CABZ01057364.1	-0.431899
senp2	-0.430645
rxraa	-0.43021
phc1	-0.430085
zgc:198419	-0.429813
BX666064.1	-0.429655
fkbp3	-0.429475
sod1	-0.429303
sh3bgrl	-0.428781
twist1b	-0.428607
AC024175.10	-0.428325
zfpl1	-0.428051
zgc:101851	-0.427469
si:ch211-213a13.2	-0.427051
gna11b	-0.427013
letm2	-0.42697
CT027604.2	-0.42638
pdia2	-0.42618
smarcd3b	-0.42546
BX571712.3	-0.425362
pgrmc1	-0.425179
rrs1	-0.424988
cthl	-0.424748
CU929206.1	-0.423279
egr3	-0.422802
csrnp1b	-0.422576
ankdd1a	-0.42256
adob.1	-0.42177
adnp2b	-0.421729
cnot6a	-0.421653
si:ch73-59f11.3	-0.421592
bc2	-0.421109
col8a2	-0.421025
CR759927.1	-0.420599
itprip	-0.42045
fopnl	-0.420261
capza1a	-0.420234
BX470107.1	-0.42003
si:ch211-238e22.7	-0.419893
mrpl54	-0.419132
tmed2	-0.418173
lamp2	-0.418013
CABZ01004687.1	-0.417957
mtg1	-0.4177
bhlhe40	-0.417611
slco1f2	-0.417531
kif13a	-0.417397
cant1a	-0.417068
ccdc47	-0.416904
pptc7a	-0.415447
CABZ01092154.1	-0.415048
naglu	-0.414953
ssb	-0.414507
5S_rRNA.1522	-0.414367
st7	-0.413973
rps18	-0.413153
fam120c	-0.413148
si:dkey-102m7.3	-0.412498
clns1a	-0.412285
sh3bp5a	-0.412272
cavin1b	-0.411879
cecr1a	-0.411035
gyg1a	-0.410324
tnfrsf1a	-0.410039
CT025669.1	-0.409988
scfd1	-0.409908
BX897714.1	-0.40917
fibinb	-0.408632
CU929345.1	-0.407565
egr1	-0.407282
hsp90b1	-0.406935
si:dkeyp-4f2.1	-0.406891
pum2	-0.406833
clptm1	-0.406665
5S_rRNA.34	-0.406386
rca2.2	-0.406024
prpf39	-0.405423
si:ch211-113p18.3	-0.405232
ptpn4a	-0.404938
acy1	-0.404858
lats2	-0.404738
scocb	-0.40338
lsm7	-0.403326
ZNF70 .3	-0.403253
znf1121	-0.403047
BX950855.3	-0.402968
FO393424.4	-0.40283
rab18b	-0.400854
GRB7	-0.400715
sass6	-0.399443
crcp	-0.398937
btbd10b	-0.398631
eif4a2	-0.398422
rbbp6	-0.398395
usp32	-0.398104
notch1b	-0.397716
zgc:113162	-0.396723
ezh1	-0.396643
cox20	-0.396242
flot1b	-0.395851
CR847936.12	-0.395674
dhrs1	-0.395514
CU929070.1	-0.394602
mapk3	-0.394571
spry4	-0.394272
znf1021.1	-0.39427
BX908401.1	-0.394128
brf1a	-0.39223
eif2s3	-0.390538
tlk2	-0.390489
USP34	-0.390184
asph	-0.389607
baxb	-0.389566
rbm28	-0.388607
eef1db	-0.387283
adssl	-0.386945
rps27a	-0.386553
foxk1	-0.38568
usp47	-0.384895
si:dkey-279j5.1	-0.384347
rab27a	-0.383852
EIF2AK4	-0.383848
si:dkey-61p9.9.1	-0.383825
CU694197.1	-0.383165
dhx8	-0.383016
tm2d1	-0.382367
dnajc1	-0.381692
pik3r3a	-0.381406
copz2	-0.381115
rhebl1	-0.380755
fam199x	-0.380036
acta1a	-0.378669
kansl2	-0.378643
CR456628.1	-0.378315
yme1l1a	-0.377525
hspa9	-0.37743
crk	-0.377409
znf536	-0.377225
fyco1a	-0.376905
gipc2	-0.376412
CABZ01044764.1	-0.375726
leng8	-0.375389
KDELR3	-0.374507
usp8	-0.374452
abca1a	-0.374132
rgmb	-0.373852
CABZ01029822.1	-0.372938
mast1b	-0.371906
BX470211.1	-0.371895
idh1	-0.371373
robo2	-0.370455
PITPNC1	-0.370096
lef1	-0.370082
her7	-0.369964
nfatc1	-0.369757
nansa	-0.369627
BX511270.1	-0.36934
CR788254.2	-0.368945
CABZ01061502.1	-0.368227
eef1da	-0.368076
kansl3	-0.367452
tram2	-0.366986
CR753876.1	-0.366648
abhd4	-0.365573
AL845330.1	-0.36519
mrpl33	-0.363745
itgb4	-0.363569
myeov2	-0.363008
psmb11b	-0.36281
dedd1	-0.362733
aldh2.1	-0.36218
gabpa	-0.361684
arhgap29a	-0.36167
flncb	-0.361283
CR759907.2	-0.361164
CR792418.4	-0.360619
wdr43	-0.360615
CABZ01017734.1	-0.360297
FO744832.1	-0.359924
epas1b	-0.359776
abl1	-0.359592
tmbim1a	-0.359304
esyt1b	-0.359241
ftr13	-0.358613
mat2aa	-0.35822
rras2	-0.358028
zpr1	-0.357842
si:dkey-114c15.5	-0.35776
INPP1	-0.356925
si:cabz01007807.1	-0.356725
gstm.1	-0.356668
CR381686.5	-0.355471
csnk2a1	-0.354383
anp32e	-0.354065
cx35.4	-0.353655
tp53bp2a	-0.353014
ndufb9	-0.352895
FP102783.1	-0.352249
sde2	-0.35177
arnt2	-0.351465
CR456627.1	-0.351427
si:dkey-177p2.6	-0.350673
gigfy2	-0.350474
slc20a1b	-0.350213
egln1a	-0.349526
trpm7	-0.349115
trim35-40	-0.348801
CT573263.1	-0.348712
ltbp1.1	-0.348385
ecel1	-0.348202
gtf2a2	-0.348131
hmgb3a	-0.348081
sorbs1	-0.347536
atp2a2a	-0.346157
CABZ01053976.1	-0.346114
CR388042.1	-0.34574
xrn2	-0.345589
khdrbs1a	-0.345334
arg2	-0.345177
znf972	-0.345144
zgc:153018	-0.344398
CR589876.2	-0.344121
fam129ab	-0.343886
trim13	-0.343585
si:ch73-390p7.2	-0.343448
stx4	-0.342649
cyp2aa2	-0.341542
FOXK2	-0.341071
actr2b	-0.340956
BX248082.1	-0.340805
med28	-0.34064
slc7a8a	-0.340351
znf598	-0.339943
trim3b	-0.338378
CU694481.1	-0.338354
zdhhc5b	-0.338289
zgc:100829	-0.337934
ankdd1b	-0.337329
BX465862.2	-0.336775
foxa2	-0.336747
rab6a	-0.336155
zgc:66475	-0.335896
kdm4b	-0.335317
rab43	-0.33496
cfap74	-0.334907
si:ch211-13k12.2	-0.334533
phf5a	-0.334362
osbpl10b	-0.33256
BX571955.2	-0.331573
wisp3	-0.331564
atp1b4	-0.331126
zfp36l2	-0.330905
CABZ01114245.1	-0.330626
glt8d1	-0.330308
cwc15	-0.329672
ppp1r13bb	-0.328271
tmem106ba	-0.327925
mob1bb	-0.327908
CU570769.2	-0.327565
ube2g1a	-0.326794
BX072561.1	-0.326729
znf1030	-0.325939
ppp2r5cb	-0.325745
CR762420.1	-0.3256
rpl21	-0.325452
f10	-0.325326
akap9	-0.325066
tacc1	-0.325063
tmem230a	-0.324616
fmo5	-0.32459
rpap3	-0.324571
chaf1a	-0.324027
FP016142.1	-0.323356
prkaa1	-0.323212
BX324206.2	-0.322976
sh3rf1	-0.322172
nsrp1	-0.320908
FP102090.1	-0.320629
fam101a	-0.320404
sys1	-0.320269
dnaja1	-0.319899
srsf11	-0.319845
si:dkey-30f3.2	-0.319795
sap30l	-0.319773
srsf7a	-0.319736
n6amt2	-0.319565
myl6	-0.318655
taldo1	-0.317006
FP016106.1	-0.316823
si:dkey-190j3.4	-0.316481
BX511084.1	-0.316016
si:dkey-196n19.2	-0.315856
btaf1	-0.315855
ucp3	-0.315785
chd1	-0.315542
BX927336.1	-0.315438
zgc:153240	-0.315324
BX469930.1	-0.315093
tmc6b	-0.315043
fzd5	-0.314953
ERCC-00043	-0.314786
si:dkey-31e10.5	-0.314582
usp19	-0.313874
BX649417.3	-0.313588
chpfa	-0.313384
nfe2l3	-0.313073
si:dkey-7j22.1	-0.312976
rps15a	-0.312678
zgc:66483	-0.312542
rprd2b	-0.311256
ywhae1	-0.311233
CU929277.1	-0.310071
matr3l1.1.1	-0.309776
pkp2	-0.309671
top3b	-0.30935
thraa	-0.309327
si:dkey-286j15.1	-0.309214
dhps	-0.309161
BX908721.1	-0.308835
tle2	-0.308669
CT955962.2	-0.30791
ypel1	-0.307502
rer1	-0.306297
api5	-0.306175
si:ch211-194p6.10	-0.305806
nrxn2b	-0.305655
taf6	-0.304956
emc8	-0.304904
ehd1b	-0.304781
bcat2	-0.30469
trim16	-0.304512
tmem167a	-0.304459
abce1	-0.30425
porcn	-0.303625
rps21	-0.302954
edf1	-0.302551
si:ch211-196l7.4	-0.302547
CU914776.1	-0.302441
yipf5	-0.302251
ercc6	-0.301833
adra2b	-0.301622
myt1b	-0.301585
egr4	-0.299793
CU571074.1	-0.299465
rpl27	-0.299396
spcs3	-0.299276
ttc17	-0.298933
col27a1b	-0.297851
actc1b	-0.297695
znf1116	-0.296912
cpxm1b	-0.296746
sgip1a	-0.296176
PDE3B	-0.296139
znf385d	-0.295995
U6.323	-0.295866
smg7	-0.295602
CR388165.2	-0.295214
bxdc2	-0.294912
slc35c2	-0.294657
ZBTB26	-0.293976
SNORA27	-0.293501
fam76b	-0.293376
ddx21	-0.293285
dock10	-0.292955
txndc15	-0.292205
chid1	-0.291922
si:ch73-308l14.2	-0.291886
snrnp70	-0.291841
plcg2	-0.291331
dnmbp	-0.291234
CHST13	-0.290218
nfia	-0.289339
si:zfos-80g12.1	-0.288831
nostrin	-0.288499
zfhx3	-0.288491
si:ch73-248e21.1	-0.287528
CR352226.6	-0.287497
CT025651.1	-0.287442
si:ch211-266d19.4	-0.287045
BX936461.1	-0.286751
ddx49	-0.286185
cxcl14	-0.286059
itpr1b	-0.285263
tdo2a	-0.285173
AKAP13 .1	-0.285065
CU694380.1	-0.284992
tram1	-0.284697
cyhr1	-0.282722
pfkfb4a	-0.282488
zfyve9a	-0.282459
CABZ01092156.1	-0.280825
rassf2b	-0.280595
FQ323156.1	-0.280495
BX649328.1	-0.280342
znf1040	-0.280095
pdia4	-0.279564
BX005275.2	-0.279298
st13	-0.279129
mars	-0.278919
adipor2	-0.278247
pdcd11	-0.278203
SNORA63.4	-0.278195
stox2a	-0.277805
setd6	-0.277671
tipin	-0.277386
ptk2ab	-0.276975
mapkap1	-0.276636
arid4a	-0.275608
CR933734.1	-0.274306
plekhf2	-0.27402
snrka	-0.273059
rap1b	-0.272917
ahsa1b	-0.27252
si:ch211-220f16.1	-0.27223
hmga1a	-0.271999
serp1	-0.27185
prkacbb	-0.271236
axin2	-0.270831
grb10b	-0.270695
BX005268.2	-0.269881
si:ch211-110e21.4	-0.269818
lepb	-0.2689
dusp8b	-0.268689
slc25a16	-0.268117
wdfy2	-0.268041
stk35l	-0.268019
stx18	-0.267557
kdm4ab	-0.267391
bida	-0.266784
cc2d1b	-0.26659
dhx9	-0.266361
srpr	-0.266252
elac2	-0.265763
gpr176	-0.265416
etnk1	-0.265269
mfap2	-0.26369
si:ch211-276a17.5	-0.263386
acbd3	-0.262544
sub1a	-0.261905
fam135a	-0.261838
FAM57A	-0.261812
trim35-28	-0.26139
ERCC-00002	-0.259765
kcnk4a	-0.259754
CU571319.2	-0.259699
pfn2	-0.259688
zgc:171965	-0.259609
CABZ01017723.1	-0.259609
plcg1	-0.259375
ripk4	-0.258055
CABZ01037120.1	-0.257593
egfra	-0.257185
slc1a3a	-0.256134
zgc:101559	-0.255976
rcvrn3	-0.255902
ppp1cbl	-0.255844
cyp2aa4	-0.255791
vps26a	-0.255654
MYO7B	-0.254765
chmp2bb	-0.2545
brd4	-0.253627
eif6	-0.253498
polr3k	-0.253117
tomm6	-0.253043
tlk1b	-0.253007
znf1097	-0.252257
AC024175.24	-0.25191
myh11b	-0.251813
si:ch73-367f21.6	-0.25147
trpt1	-0.251443
cited2	-0.251344
ngdn	-0.251257
CU928117.1	-0.250198
insra	-0.249671
cyp3c1	-0.248896
itln2.1	-0.248694
prkrip1	-0.248652
mettl20	-0.247666
rps29	-0.247279
soul3	-0.246047
si:dkey-29j8.1.1	-0.245969
cx34.4	-0.245438
arl8ba	-0.245258
rpl31	-0.245193
cldn19	-0.244198
slc6a16a	-0.244019
ttc13	-0.243487
si:rp71-45g20.10	-0.243331
CABZ01080379.1	-0.243222
col6a1	-0.242349
cryba1b	-0.24125
si:ch211-232b12.5	-0.240612
BX640547.2	-0.240552
znf668	-0.23955
FO704910.4	-0.238734
zgc:154075	-0.238372
hmgxb4a	-0.237882
ddx43	-0.237622
CABZ01077978.1	-0.237439
rhpn2	-0.237332
hrh3	-0.2371
gadd45ga	-0.236042
mrps36	-0.235911
cmbl	-0.235202
wbp1lb	-0.235179
whsc1l1	-0.23473
rnf13	-0.234342
sgsh	-0.234283
ntn1b	-0.234109
CT027801.1	-0.233283
her12	-0.232538
5S_rRNA.347	-0.232284
CABZ01032488.1	-0.23215
rpa1	-0.232099
vps13a	-0.231639
tbl1xr1b	-0.231526
CT027744.1	-0.231444
ndufa3	-0.231411
mvb12a	-0.23141
cog3	-0.230901
si:ch211-67e16.4	-0.230666
ptcd1	-0.230291
kdm2bb.1	-0.230271
sptlc2b	-0.230046
CABZ01066719.1	-0.22861
ndufs5	-0.228332
paf1	-0.227225
AL645691.3	-0.226915
si:dkey-16p6.1.20	-0.226915
si:ch211-198a12.6	-0.226449
gbp	-0.226121
si:ch211-194p6.12	-0.225897
nr1d1	-0.22566
pknox1.1	-0.225424
sdc4	-0.225357
gnav1	-0.224522
si:ch211-272h9.5	-0.224257
adamts1	-0.223558
trip12	-0.223189
Mar-07.1	-0.222921
mthfd2	-0.222817
chuk	-0.22279
fgfr2	-0.222785
5S_rRNA.980	-0.222391
or126-5	-0.222391
wtap	-0.222378
anapc15	-0.221948
csf3r	-0.221095
si:ch211-271g18.1.1	-0.220269
si:ch211-238e22.5	-0.219883
tagln2	-0.218508
zhx2a	-0.217904
CR450817.1	-0.217732
RASA2	-0.217357
si:dkey-100n23.5	-0.217334
si:dkey-208b23.5	-0.216348
phactr4b	-0.216055
si:ch211-261i17.2	-0.215809
ndfip1	-0.215591
rassf3	-0.215515
lcmt1	-0.215147
clpxa.1	-0.215042
zgc:91940	-0.21454
lsm4	-0.214409
AC024175.14	-0.213876
mettl10	-0.213761
CU657977.1	-0.213504
sra1	-0.213305
rpl14	-0.213228
pabpn1	-0.212896
si:ch211-79g12.2	-0.212872
si:ch211-255f4.7	-0.212297
lix1l	-0.212229
minos1	-0.211918
si:zfos-44a5.1	-0.211885
si:dkey-33c12.12.1	-0.211714
luc7l3	-0.211674
fam234b	-0.210918
bccip	-0.210839
shrprbck1r	-0.210697
rps6kal	-0.210412
AL840638.2	-0.209937
sf3a1	-0.209297
si:dkey-260c8.6	-0.209019
slc35d1a	-0.208647
saa	-0.208615
nucks1b	-0.20858
rnf17	-0.208458
cntn1a	-0.208458
rcc2	-0.208408
scxa	-0.208146
BX908782.3	-0.208115
vdac1	-0.207879
cept1a	-0.207751
atxn7	-0.207737
zgc:112185	-0.207478
foxa1	-0.205833
BX649622.2	-0.205793
cdk6	-0.205673
fbxo11a.1	-0.205256
vimp	-0.204954
BX088551.1	-0.204708
hcls1	-0.204606
rpl18	-0.203662
hectd1	-0.202675
RDH13 .2	-0.202459
glt8d2	-0.202043
frya	-0.20191
b3gnt2b	-0.201862
ost4	-0.201853
ptn	-0.201779
copb1	-0.200844
[truncated: 8,841 more rows]

## Sheet: Sup File 1b List Sources
Dataset	Used in	Source
WT1 Targets Lab Validated	Fig.4h: GSEA - WT1 Targets (NHastie&TRED)	Nick Hastie Lab
WT1 Targets TRED	Fig.4h: GSEA - WT1 Targets (NHastie&TRED)	http://rulai.cshl.edu/TRED/GRN/WT1.htm
p53 TRED	Fig.4k: GSEA - p53 All Lists	http://rulai.cshl.edu/TRED/GRN/p53.htm
pAPO: p53-activated	Fig.4k: GSEA - p53 All Lists	https://www.ncbi.nlm.nih.gov/pubmed/25790137
pAPO: p53-repressive	Fig.4k: GSEA - p53 All Lists	https://www.ncbi.nlm.nih.gov/pubmed/25790137
RIS: p53-activated	Fig.4k: GSEA - p53 All Lists	https://www.ncbi.nlm.nih.gov/pubmed/25790137
RIS: p53-repressive	Fig.4k: GSEA - p53 All Lists	https://www.ncbi.nlm.nih.gov/pubmed/25790137
D. rerio p53-target genes	Fig.4k: GSEA - p53 All Lists	https://www.ncbi.nlm.nih.gov/pmc/articles/PMC5007497/#S1
WT1-interacting partners	Fig.4i: Heatmap	http://www.biochemj.org/content/461/1/15.figures-only
D. rerio Cartilage Associated Genes	Fig.4g: GSEA - Cartilage	http://amigo.geneontology.org/amigo/term/GO:0051216
*Genes in common between WT1 lists (orange) and p53 lists (red) were used in Fig.4l GSEA - WT1 and p53 common targets

## Sheet: Sup File 1c Cartilage List
NAME	PROBE	GENE SYMBOL	GENE_TITLE	RANK IN GENE LIST	RANK METRIC SCORE	RUNNING ES	CORE ENRICHMENT
row_0	tmem165	null	null	43	4.05919	0.0570424	Yes
row_1	ctsk	null	null	220	2.89473	0.0842102	Yes
row_2	mustn1b	null	null	252	2.8396	0.124029	Yes
row_3	pmm2	null	null	393	2.48856	0.148435	Yes
row_4	loxl2b	null	null	399	2.48353	0.185316	Yes
row_5	mmp14b	null	null	468	2.31638	0.213827	Yes
row_6	sec23b	null	null	605	2.05979	0.232158	Yes
row_7	loxl2a	null	null	721	1.84684	0.249239	Yes
row_8	cdh2	null	null	992	1.47349	0.246297	Yes
row_9	polr1c	null	null	1032	1.42344	0.264076	Yes
row_10	cyp26b1	null	null	1133	1.3074	0.27444	Yes
row_11	plcb3	null	null	1267	1.14833	0.279344	Yes
row_12	runx1	null	null	1280	1.13372	0.295277	Yes
row_13	cnbpa	null	null	1387	1.03501	0.300986	Yes
row_14	jag1b	null	null	1390	1.02811	0.31626	Yes
row_15	runx2a	null	null	1405	1.01448	0.330214	Yes
row_16	uxs1	null	null	1539	0.922986	0.331729	Yes
row_17	runx3	null	null	1714	0.845529	0.328269	Yes
row_18	gfpt1	null	null	1733	0.840695	0.339237	Yes
row_19	gpc4	null	null	1928	0.765071	0.332707	Yes
row_20	mmp14a	null	null	1974	0.748581	0.33978	Yes
row_21	fgfrl1a	null	null	2273	0.653065	0.321898	No
row_22	sec13	null	null	2296	0.646696	0.329577	No
row_23	ext2	null	null	2535	0.579928	0.316173	No
row_24	slc35b2	null	null	2607	0.560627	0.318003	No
row_25	mbtps1	null	null	2630	0.554255	0.324292	No
row_26	sox9a	null	null	2932	0.485296	0.303608	No
row_27	chrna1	null	null	3039	0.46495	0.300746	No
row_28	rap1aa	null	null	3072	0.457745	0.304654	No
row_29	fmr1	null	null	3119	0.446469	0.307092	No
row_30	alcama	null	null	3258	0.420379	0.300584	No
row_31	sec23a	null	null	3386	0.400729	0.294804	No
row_32	and2	null	null	3620	0.359833	0.278555	No
row_33	prdm1a	null	null	3667	0.349627	0.279536	No
row_34	yap1	null	null	4035	0.282663	0.249669	No
row_35	rnf2	null	null	4088	0.272598	0.248934	No
row_36	tbx1	null	null	4326	0.227869	0.230328	No
row_37	kat6a	null	null	4357	0.223231	0.230896	No
row_38	dcn	null	null	4450	0.202956	0.225396	No
row_39	gnptab	null	null	4495	0.193067	0.224209	No
row_40	aldh7a1	null	null	4670	0.165793	0.210526	No
row_41	wnt9a	null	null	5034	0.123802	0.178642	No
row_42	chsy1	null	null	5212	0.108358	0.163817	No
row_43	htt	null	null	5430	0.0884185	0.144974	No
row_44	mef2ca	null	null	5817	0.0493755	0.109833	No
row_45	acvr1l	null	null	5952	0.0371281	0.0979343	No
row_46	tapt1b	null	null	5953	0.0370802	0.0984919	No
row_47	faf1	null	null	5996	0.0341287	0.0951007	No
row_48	ewsr1a	null	null	6045	0.0310401	0.0911052	No
row_49	nrp1a	null	null	6475	0.00252491	0.0512622	No
row_50	smo	null	null	6538	0	0.0454985	No
row_51	crispld2	null	null	6664	0	0.0338781	No
row_52	sec24d	null	null	6665	0	0.0338781	No
row_53	ddrgk1	null	null	6671	0	0.0334133	No
row_54	pappa2	null	null	6931	0	0.00933599	No
row_55	enpp2	null	null	7077	0	-0.00414361	No
row_56	hcfc1b	null	null	7202	0	-0.015671	No
row_57	polr1d	null	null	7332	0	-0.0276632	No
row_58	sema3d	null	null	7448	0	-0.0383539	No
row_59	dlx3b	null	null	7495	0	-0.0426302	No
row_60	fam212aa	null	null	7878	0	-0.0781419	No
row_61	and1	null	null	7922	0	-0.0821393	No
row_62	chd7	null	null	8680	-0.149761	-0.15026	No
row_63	ednraa	null	null	8718	-0.162129	-0.151262	No
row_64	rap1b	null	null	9041	-0.272916	-0.177092	No
row_65	wisp3	null	null	9203	-0.331564	-0.187073	No
row_66	scfd1	null	null	9387	-0.409908	-0.197921	No
row_67	skib	null	null	9560	-0.494776	-0.206471	No
row_68	sox9b	null	null	9667	-0.546548	-0.208106	No
row_69	irx5a	null	null	9723	-0.581597	-0.204473	No
row_70	lpar1	null	null	9749	-0.596806	-0.197823	No
row_71	furina	null	null	10113	-0.960844	-0.21712	No
row_72	notch2	null	null	10130	-0.977731	-0.203904	No
row_73	acvr2aa	null	null	10220	-1.11131	-0.195467	No
row_74	rerea	null	null	10339	-1.29854	-0.18691	No
row_75	nog3	null	null	10367	-1.34789	-0.169151	No
row_76	col11a2	null	null	10596	-1.84959	-0.162534	No
row_77	kmt2d	null	null	10668	-2.10788	-0.137437	No
row_78	creb3l2	null	null	10689	-2.19196	-0.106335	No
row_79	egf	null	null	10730	-2.39134	-0.0740935	No
row_80	dcaf7	null	null	10775	-2.75584	-0.0367431	No
row_81	sparc	null	null	10783	-2.82673	0.00511293	No

## Sheet: Sup File 1d WT1 Targets 
NAME	PROBE	GENE SYMBOL	GENE_TITLE	RANK IN GENE LIST	RANK METRIC SCORE	RUNNING ES	CORE ENRICHMENT
row_0	ccl35.2	null	null	187	2.99391	0.0574467	No
row_1	tp53	null	null	600	2.06745	0.0708839	No
row_2	pdgfab	null	null	774	1.77236	0.0991144	No
row_3	col1a1a	null	null	1409	1.00995	0.065547	No
row_4	ror2	null	null	1540	0.922743	0.0765414	No
row_5	cav1	null	null	1663	0.866722	0.0868783	No
row_6	col1a1b	null	null	1952	0.756735	0.0790731	No
row_7	rarab	null	null	2131	0.698025	0.0800026	No
row_8	cxxc5b	null	null	2241	0.664261	0.0864875	No
row_9	sf1	null	null	2714	0.535289	0.0560866	No
row_10	igf2a	null	null	3053	0.460999	0.0362569	No
row_11	zeb1b	null	null	3073	0.457624	0.0459264	No
row_12	sox11a	null	null	3079	0.456519	0.0568667	No
row_13	igf1ra	null	null	3215	0.427624	0.0550292	No
row_14	col5a1	null	null	3616	0.361308	0.0269594	No
row_15	cxxc5a	null	null	3675	0.347989	0.0302734	No
row_16	igf2b	null	null	3739	0.336089	0.0328265	No
row_17	aldh1a2	null	null	4196	0.252247	-0.00316108	No
row_18	ube2ib	null	null	4580	0.178368	-0.0342243	No
row_19	tgfb1a	null	null	5219	0.107733	-0.0907003	No
row_20	raraa	null	null	5456	0.085843	-0.110442	No
row_21	snai1a	null	null	5502	0.0814353	-0.112581	No
row_22	smad3b	null	null	5772	0.0528751	-0.136207	No
row_23	dvl1a	null	null	6293	0.0143129	-0.184074	No
row_24	ube2ia	null	null	6432	0.00494038	-0.196748	No
row_25	TNC	null	null	6674	0	-0.219098	No
row_26	gli1	null	null	6891	0	-0.23913	No
row_27	abcb4	null	null	7101	0	-0.258512	No
row_28	ciao1	null	null	7199	0	-0.267508	No
row_29	pdgfaa	null	null	7998	0	-0.341513	No
row_30	CABZ01080918.1	null	null	8084	0	-0.349396	No
row_31	thbs1b	null	null	8249	-0.0314288	-0.36382	No
row_32	lsp1	null	null	8349	-0.0597039	-0.371509	No
row_33	scxa	null	null	8862	-0.208146	-0.413792	No
row_34	wtap	null	null	8907	-0.222378	-0.412317	No
row_35	fgfr2	null	null	8910	-0.222785	-0.406938	No
row_36	egfra	null	null	9001	-0.257185	-0.40886	No
row_37	lef1	null	null	9300	-0.370082	-0.427251	Yes
row_38	egr1	null	null	9383	-0.407282	-0.424681	Yes
row_39	sod1	null	null	9445	-0.429303	-0.419614	Yes
row_40	wnt4b	null	null	9594	-0.512108	-0.420547	Yes
row_41	igf1rb	null	null	9796	-0.63246	-0.423388	Yes
row_42	odc1	null	null	10062	-0.902751	-0.425413	Yes
row_43	tgfb3	null	null	10137	-0.983534	-0.407707	Yes
row_44	vdrb	null	null	10142	-0.984641	-0.383481	Yes
row_45	smad3a	null	null	10160	-1.01319	-0.359748	Yes
row_46	cdkn1a	null	null	10192	-1.07513	-0.335766	Yes
row_47	mdka	null	null	10207	-1.08781	-0.30989	Yes
row_48	mycb	null	null	10222	-1.12152	-0.283172	Yes
row_49	myca	null	null	10350	-1.32401	-0.261876	Yes
row_50	sulf1	null	null	10368	-1.34865	-0.229763	Yes
row_51	ctgfb	null	null	10451	-1.50088	-0.199875	Yes
row_52	ctgfa	null	null	10661	-2.09576	-0.166904	Yes
row_53	mycn	null	null	10678	-2.13972	-0.114937	Yes
row_54	cat	null	null	10706	-2.24619	-0.0613305	Yes
row_55	pbx2	null	null	10793	-2.94149	0.00417341	Yes

## Sheet: Sup File 1e p53 Targets
NAME	PROBE	GENE SYMBOL	GENE_TITLE	RANK IN GENE LIST	RANK METRIC SCORE	RUNNING ES	CORE ENRICHMENT
row_0	fuca1.1	null	null	23	4.34106	0.00186374	Yes
row_1	acvr1ba	null	null	24	4.32542	0.00615773	Yes
row_2	flnca	null	null	36	4.13745	0.0090954	Yes
row_3	cxcr4b	null	null	37	4.13542	0.0132008	Yes
row_4	uxt	null	null	45	4.00126	0.0164286	Yes
row_5	hspa4b	null	null	57	3.92211	0.0191525	Yes
row_6	mgat1b	null	null	62	3.91096	0.0226097	Yes
row_7	tspy	null	null	69	3.84818	0.0257919	Yes
row_8	aida	null	null	71	3.84533	0.0295029	Yes
row_9	lgals2a	null	null	72	3.82454	0.0332997	Yes
row_10	hspa14	null	null	76	3.75865	0.036712	Yes
row_11	elp3	null	null	81	3.7146	0.0399742	Yes
row_12	CABZ01101812.1	null	null	83	3.69404	0.0435351	Yes
row_13	afap1l2	null	null	90	3.62916	0.0464998	Yes
row_14	gsna	null	null	92	3.60348	0.0499708	Yes
row_15	snx3	null	null	102	3.50686	0.0524951	Yes
row_16	gpx1b	null	null	107	3.48625	0.0555307	Yes
row_17	scpep1	null	null	113	3.40053	0.0583748	Yes
row_18	gusb	null	null	117	3.38312	0.0614143	Yes
row_19	clcf1	null	null	125	3.32727	0.0639731	Yes
row_20	eif4h	null	null	134	3.28003	0.0663785	Yes
row_21	ctsd	null	null	143	3.18158	0.0686863	Yes
row_22	pias2	null	null	152	3.13551	0.0709483	Yes
row_23	NPNT	null	null	158	3.11745	0.0735114	Yes
row_24	ube2g1b	null	null	165	3.05973	0.0759109	Yes
row_25	grnb	null	null	170	3.04785	0.0785113	Yes
row_26	nedd4a	null	null	190	2.98809	0.0794572	Yes
row_27	cul4b	null	null	194	2.9811	0.0820976	Yes
row_28	hdr	null	null	200	2.95127	0.0844958	Yes
row_29	ptpn13	null	null	214	2.90061	0.0859929	Yes
row_30	il1b	null	null	217	2.89751	0.0886567	Yes
row_31	sqstm1	null	null	227	2.88015	0.0905589	Yes
row_32	anxa4	null	null	244	2.85383	0.0916906	Yes
row_33	gamt	null	null	249	2.84134	0.0940859	Yes
row_34	myl12.2	null	null	251	2.83981	0.0967987	Yes
row_35	vcanb	null	null	258	2.82013	0.0989603	Yes
row_36	tmtc3	null	null	262	2.80059	0.101422	Yes
row_37	map4k3a	null	null	263	2.79787	0.104199	Yes
row_38	pdcd6ip	null	null	264	2.79455	0.106973	Yes
row_39	hspa8	null	null	266	2.79091	0.109638	Yes
row_40	shc1	null	null	273	2.77557	0.111755	Yes
row_41	MZT1	null	null	276	2.77346	0.114296	Yes
row_42	man1a2	null	null	292	2.74889	0.115429	Yes
row_43	zyx	null	null	299	2.7267	0.117498	Yes
row_44	p3h2	null	null	317	2.69094	0.118362	Yes
row_45	poglut1	null	null	319	2.68354	0.12092	Yes
row_46	tgm2b	null	null	321	2.67033	0.123464	Yes
row_47	mbd3a	null	null	322	2.66998	0.126115	Yes
row_48	oxa1l	null	null	324	2.66488	0.128654	Yes
row_49	nucb1	null	null	330	2.65778	0.130761	Yes
row_50	tubb6	null	null	338	2.61596	0.132613	Yes
row_51	tp53inp1	null	null	340	2.61149	0.1351	Yes
row_52	rbm34	null	null	342	2.60554	0.13758	Yes
row_53	brd9	null	null	350	2.58149	0.139398	Yes
row_54	atl3	null	null	351	2.58125	0.141961	Yes
row_55	tmx1	null	null	354	2.57529	0.144305	Yes
row_56	cebpb	null	null	359	2.55578	0.146416	Yes
row_57	st3gal3a	null	null	367	2.53357	0.148187	Yes
row_58	lyrm4	null	null	368	2.53339	0.150702	Yes
row_59	col12a1b	null	null	377	2.51597	0.152349	Yes
row_60	vmp1	null	null	386	2.49899	0.153979	Yes
row_61	prpf19	null	null	392	2.48887	0.155918	Yes
row_62	mapk14b	null	null	401	2.4803	0.15753	Yes
row_63	mif	null	null	416	2.44881	0.158472	Yes
row_64	atp6v1aa	null	null	417	2.44791	0.160902	Yes
row_65	pgm1	null	null	420	2.44668	0.163119	Yes
row_66	cebpa	null	null	427	2.42815	0.164891	Yes
row_67	ndufv2	null	null	429	2.42479	0.167192	Yes
row_68	ak1	null	null	431	2.42053	0.169489	Yes
row_69	PEPD	null	null	432	2.41457	0.171886	Yes
row_70	nop16	null	null	441	2.37915	0.173397	Yes
row_71	dram1	null	null	445	2.35686	0.175417	Yes
row_72	lgals3b	null	null	448	2.35295	0.177541	Yes
row_73	CU929259.1	null	null	458	2.33659	0.178903	Yes
row_74	lypla2	null	null	474	2.30769	0.179599	Yes
row_75	ict1	null	null	486	2.28989	0.180703	Yes
row_76	gps1	null	null	497	2.27278	0.181895	Yes
row_77	gadd45ab	null	null	501	2.2599	0.18382	Yes
row_78	trmt112	null	null	506	2.24831	0.185627	Yes
row_79	myg1	null	null	509	2.24248	0.18764	Yes
row_80	nup88	null	null	511	2.23745	0.189755	Yes
row_81	myzap	null	null	519	2.22245	0.191217	Yes
row_82	add3a	null	null	533	2.19661	0.192015	Yes
row_83	phactr2	null	null	536	2.19205	0.193979	Yes
row_84	noc2l	null	null	544	2.17045	0.195389	Yes
row_85	stx12	null	null	548	2.16191	0.197216	Yes
row_86	limk2	null	null	566	2.13506	0.197528	Yes
row_87	pdlim5b	null	null	568	2.12665	0.199533	Yes
row_88	zcchc7	null	null	572	2.12284	0.201321	Yes
row_89	rbbp9	null	null	576	2.11242	0.203099	Yes
row_90	USMG5	null	null	580	2.10244	0.204867	Yes
row_91	vars	null	null	584	2.09232	0.206625	Yes
row_92	btf3l4	null	null	585	2.091	0.208701	Yes
row_93	aimp2	null	null	587	2.08773	0.210667	Yes
row_94	tmem50a	null	null	589	2.08476	0.212631	Yes
row_95	wdr74	null	null	590	2.08298	0.214699	Yes
row_96	pacsin3	null	null	593	2.07884	0.21655	Yes
row_97	tp53	null	null	600	2.06745	0.217964	Yes
row_98	calm3b	null	null	603	2.06577	0.219802	Yes
row_99	sec23b	null	null	605	2.05979	0.221741	Yes
row_100	vps29	null	null	606	2.05569	0.223781	Yes
row_101	gna13a	null	null	610	2.04751	0.225495	Yes
row_102	mrpl11	null	null	621	2.02254	0.226439	Yes
row_103	kctd3	null	null	625	2.01981	0.228126	Yes
row_104	ppp2r1ba	null	null	634	1.99828	0.229259	Yes
row_105	cd9b	null	null	643	1.98349	0.230377	Yes
row_106	rp2	null	null	656	1.9556	0.231042	Yes
row_107	kbtbd8	null	null	663	1.94506	0.232335	Yes
row_108	itga1	null	null	664	1.94242	0.234264	Yes
row_109	exosc3	null	null	665	1.93875	0.236188	Yes
row_110	tmem147	null	null	668	1.93445	0.237896	Yes
row_111	ndufv3	null	null	676	1.91565	0.239053	Yes
row_112	fasn	null	null	678	1.91452	0.240848	Yes
row_113	hmgcra	null	null	679	1.91272	0.242746	Yes
row_114	mbnl1	null	null	681	1.90869	0.244535	Yes
row_115	wars	null	null	684	1.90459	0.246213	Yes
row_116	rassf1	null	null	687	1.90112	0.247888	Yes
row_117	sesn2	null	null	690	1.89695	0.249558	Yes
row_118	cct7	null	null	701	1.88605	0.250367	Yes
row_119	arpc1b	null	null	704	1.86945	0.25201	Yes
row_120	bada	null	null	706	1.86775	0.253758	Yes
row_121	gcdha	null	null	713	1.85464	0.254961	Yes
row_122	ubr3	null	null	714	1.85293	0.256801	Yes
row_123	ap1s2	null	null	719	1.84879	0.258211	Yes
row_124	ctnna1	null	null	724	1.83738	0.259609	Yes
row_125	capzb	null	null	726	1.8339	0.261323	Yes
row_126	mccc2	null	null	738	1.82257	0.261963	Yes
row_127	si:ch211-284b7.3	null	null	744	1.81545	0.263234	Yes
row_128	ubfd1	null	null	747	1.80613	0.264814	Yes
row_129	psma2	null	null	753	1.7938	0.266063	Yes
row_130	hddc2	null	null	757	1.79025	0.267521	Yes
row_131	fbln2	null	null	759	1.78664	0.269189	Yes
row_132	rrm2b	null	null	768	1.78105	0.270106	Yes
row_133	ube2kb	null	null	770	1.77868	0.271765	Yes
row_134	MRPS12	null	null	772	1.77535	0.273422	Yes
row_135	gclm	null	null	773	1.77274	0.275181	Yes
row_136	TIMP3	null	null	783	1.75879	0.27597	Yes
row_137	pabpc1a	null	null	784	1.75742	0.277715	Yes
row_138	fam198a	null	null	789	1.74729	0.279024	Yes
row_139	trir	null	null	791	1.74011	0.280645	Yes
row_140	psmc1a	null	null	801	1.73083	0.281407	Yes
row_141	psme4a	null	null	802	1.7303	0.283124	Yes
row_142	mtpn	null	null	815	1.71379	0.28355	Yes
row_143	ppm1g	null	null	828	1.69106	0.283952	Yes
row_144	ddx39aa	null	null	829	1.6884	0.285628	Yes
row_145	herpud1	null	null	836	1.67559	0.286654	Yes
row_146	tm9sf2	null	null	837	1.67476	0.288316	Yes
row_147	hopx	null	null	847	1.66093	0.289008	Yes
row_148	slc36a1	null	null	849	1.65579	0.290546	Yes
row_149	ewsr1b	null	null	850	1.65476	0.292188	Yes
row_150	dusp1	null	null	851	1.65294	0.293829	Yes
row_151	ap1b1	null	null	853	1.64879	0.29536	Yes
row_152	slc37a2	null	null	855	1.64716	0.296889	Yes
row_153	psap	null	null	859	1.64334	0.298201	Yes
row_154	mrpl39	null	null	872	1.62319	0.298536	Yes
row_155	tmem115	null	null	875	1.62202	0.299934	Yes
row_156	eif5	null	null	878	1.61572	0.301325	Yes
row_157	serpinb1l3	null	null	888	1.60223	0.301959	Yes
row_158	emc6	null	null	891	1.59733	0.303332	Yes
row_159	fermt2	null	null	893	1.59288	0.304807	Yes
row_160	ptpn11a	null	null	910	1.57348	0.304667	Yes
row_161	clk4b	null	null	912	1.57206	0.306122	Yes
row_162	snx7	null	null	916	1.5688	0.30736	Yes
row_163	prdx5	null	null	921	1.563	0.308486	Yes
row_164	ttll4	null	null	936	1.5376	0.308524	Yes
row_165	arhgdia	null	null	945	1.5281	0.30919	Yes
row_166	itga5	null	null	946	1.52795	0.310707	Yes
row_167	relb	null	null	949	1.5265	0.31201	Yes
row_168	lmbrd2a	null	null	951	1.5234	0.313416	Yes
row_169	slc38a7	null	null	953	1.52244	0.314821	Yes
row_170	mgat1a	null	null	957	1.51554	0.316007	Yes
row_171	snrpa1	null	null	958	1.51404	0.31751	Yes
row_172	insig2	null	null	970	1.49581	0.317825	Yes
row_173	nipa2	null	null	989	1.47611	0.317376	Yes
row_174	ahnak	null	null	1002	1.46333	0.317553	Yes
row_175	cdc34a	null	null	1009	1.45838	0.318363	Yes
row_176	ckba	null	null	1012	1.45639	0.319596	Yes
row_177	tnfrsf11a	null	null	1015	1.45305	0.320825	Yes
row_178	bcl3	null	null	1018	1.44913	0.322051	Yes
row_179	epha2a	null	null	1026	1.43491	0.322732	Yes
row_180	aph1b	null	null	1027	1.43485	0.324156	Yes
row_181	klf6a	null	null	1034	1.4225	0.32493	Yes
row_182	mta2	null	null	1045	1.40573	0.325262	Yes
row_183	vezf1a	null	null	1048	1.40337	0.326443	Yes
row_184	lrp10	null	null	1050	1.40252	0.327729	Yes
row_185	bag1	null	null	1060	1.39473	0.328156	Yes
row_186	pank2	null	null	1061	1.3923	0.329538	Yes
row_187	lmna	null	null	1069	1.38208	0.330166	Yes
row_188	cd151l	null	null	1073	1.38016	0.331217	Yes
row_189	lgals3a	null	null	1075	1.37571	0.332477	Yes
row_190	smarce1	null	null	1076	1.375	0.333842	Yes
row_191	ap3m1	null	null	1082	1.36565	0.334666	Yes
row_192	bloc1s6	null	null	1090	1.35707	0.335269	Yes
row_193	sptbn1	null	null	1091	1.35602	0.336615	Yes
row_194	anxa5b	null	null	1101	1.34465	0.336992	Yes
row_195	ap2s1	null	null	1105	1.33918	0.338003	Yes
row_196	plxnb1a	null	null	1110	1.33253	0.3389	Yes
row_197	ccng1	null	null	1125	1.31368	0.338716	Yes
row_198	rbm4.2	null	null	1127	1.31219	0.339912	Yes
row_199	vps28	null	null	1128	1.312	0.341215	Yes
row_200	rtn3	null	null	1138	1.30551	0.341554	Yes
row_201	laptm4a	null	null	1140	1.30229	0.34274	Yes
row_202	hmox1a	null	null	1141	1.30201	0.344033	Yes
row_203	RNPS1	null	null	1146	1.29928	0.344897	Yes
row_204	mid1ip1b	null	null	1166	1.27613	0.344144	Yes
row_205	arpc1a	null	null	1168	1.27493	0.345303	Yes
row_206	dynlt3	null	null	1174	1.27083	0.346033	Yes
row_207	mmp2	null	null	1182	1.26278	0.346542	Yes
row_208	hikeshi	null	null	1186	1.2577	0.347472	Yes
row_209	ube2d3	null	null	1191	1.25385	0.348291	Yes
row_210	nsfl1c	null	null	1197	1.24997	0.349	Yes
row_211	picalma	null	null	1209	1.23099	0.349052	Yes
row_212	smim12	null	null	1210	1.22961	0.350273	Yes
row_213	lysmd2	null	null	1221	1.2203	0.350421	Yes
row_214	rnf128a	null	null	1222	1.2197	0.351632	Yes
row_215	vcp	null	null	1223	1.2194	0.352843	Yes
row_216	rac1a	null	null	1228	1.21047	0.353619	Yes
row_217	ppp2cb	null	null	1238	1.2023	0.353855	Yes
row_218	kpna6	null	null	1245	1.18652	0.354395	Yes
row_219	gnai1	null	null	1253	1.1766	0.354819	Yes
row_220	ccni	null	null	1270	1.14493	0.354254	Yes
row_221	bnip3lb	null	null	1274	1.13786	0.355065	Yes
row_222	tinagl1	null	null	1275	1.13736	0.356194	Yes
row_223	ndrg1a	null	null	1279	1.1344	0.357001	Yes
row_224	runx1	null	null	1280	1.13372	0.358127	Yes
row_225	cstf3	null	null	1281	1.13211	0.35925	Yes
row_226	stxbp3	null	null	1283	1.13133	0.360267	Yes
row_227	tnpo3	null	null	1287	1.1255	0.361065	Yes
row_228	nedd4l	null	null	1311	1.10159	0.359713	Yes
row_229	cdc42ep4b	null	null	1313	1.10076	0.3607	Yes
row_230	ampd3b	null	null	1325	1.09066	0.360613	Yes
row_231	uck2b	null	null	1333	1.08542	0.360946	Yes
row_232	calm3a	null	null	1336	1.08209	0.361807	Yes
row_233	sec62	null	null	1343	1.07214	0.362234	Yes
row_234	hdac3	null	null	1350	1.0641	0.362652	Yes
row_235	dgkaa	null	null	1356	1.06035	0.363173	Yes
row_236	hnrnph3	null	null	1363	1.05702	0.363584	Yes
row_237	si:dkey-93h22.8	null	null	1367	1.05181	0.36431	Yes
row_238	irak3	null	null	1378	1.0437	0.364282	Yes
row_239	mdh2	null	null	1381	1.04219	0.365104	Yes
row_240	tm7sf3	null	null	1399	1.02177	0.364311	Yes
row_241	ppfia1	null	null	1403	1.01829	0.365003	Yes
row_242	ctnnb1	null	null	1408	1.01044	0.36558	Yes
row_243	rpp30	null	null	1411	1.00834	0.366369	Yes
row_244	ubl3b	null	null	1417	1.0039	0.366834	Yes
row_245	xiap	null	null	1423	0.998148	0.367293	Yes
row_246	naa15a	null	null	1428	0.992535	0.367853	Yes
row_247	slc36a4	null	null	1431	0.990651	0.368624	Yes
row_248	snx2	null	null	1435	0.988846	0.369286	Yes
row_249	sash1a	null	null	1437	0.987412	0.37016	Yes
row_250	naa20	null	null	1444	0.984762	0.3705	Yes
row_251	atp5j	null	null	1447	0.983821	0.371264	Yes
row_252	capza1b	null	null	1451	0.981472	0.371919	Yes
row_253	wbp2	null	null	1453	0.978574	0.372784	Yes
row_254	arl6ip1	null	null	1460	0.972487	0.373112	Yes
row_255	col4a5	null	null	1469	0.965339	0.373219	Yes
row_256	mcfd2	null	null	1470	0.964881	0.374177	Yes
row_257	ddx42	null	null	1471	0.964734	0.375135	Yes
row_258	eif2s2	null	null	1472	0.963912	0.376092	Yes
row_259	rrp9	null	null	1479	0.957373	0.376404	Yes
row_260	rsu1	null	null	1480	0.956586	0.377354	Yes
row_261	ttc27	null	null	1481	0.956308	0.378303	Yes
row_262	hsd17b12a	null	null	1490	0.950924	0.378396	Yes
row_263	pls3	null	null	1501	0.944379	0.378271	Yes
row_264	ecsit	null	null	1508	0.938806	0.378564	Yes
row_265	tmed10	null	null	1510	0.938112	0.379389	Yes
row_266	nfkb2	null	null	1524	0.93296	0.378933	Yes
row_267	naa15b	null	null	1525	0.932657	0.379859	Yes
row_268	waca	null	null	1531	0.928362	0.380249	Yes
row_269	cblb	null	null	1538	0.92339	0.380528	Yes
row_270	ryk	null	null	1541	0.922703	0.381231	Yes
row_271	cflara	null	null	1543	0.922208	0.38204	Yes
row_272	tmod2	null	null	1549	0.920336	0.382422	Yes
row_273	abhd17ab	null	null	1555	0.917814	0.382802	Yes
row_274	aup1	null	null	1561	0.912312	0.383176	Yes
row_275	slc30a1a	null	null	1571	0.906837	0.383119	Yes
row_276	lasp1	null	null	1573	0.905625	0.383912	Yes
row_277	grna	null	null	1576	0.903793	0.384596	Yes
row_278	mtmr14	null	null	1582	0.900325	0.384958	Yes
row_279	apeh	null	null	1586	0.899276	0.385532	Yes
row_280	polr2i	null	null	1590	0.897313	0.386104	Yes
row_281	nras	null	null	1592	0.89614	0.386887	Yes
row_282	pik3ca	null	null	1598	0.892771	0.387242	Yes
row_283	casp8	null	null	1604	0.890581	0.387594	Yes
row_284	wdr4	null	null	1610	0.886672	0.387943	Yes
row_285	ran	null	null	1611	0.8866	0.388823	Yes
row_286	ppm1aa	null	null	1628	0.882037	0.387997	Yes
row_287	exosc8	null	null	1632	0.880583	0.388552	Yes
row_288	rrp8	null	null	1638	0.875677	0.38889	Yes
row_289	mfn1b	null	null	1639	0.875528	0.389759	Yes
row_290	fgfr3	null	null	1642	0.875359	0.390415	Yes
row_291	gtf2f2a	null	null	1644	0.874837	0.391177	Yes
row_292	itm2bb	null	null	1647	0.873537	0.391832	Yes
row_293	plod2	null	null	1649	0.873101	0.392592	Yes
row_294	pstpip2	null	null	1658	0.868591	0.392604	Yes
row_295	cav1	null	null	1663	0.866722	0.393039	Yes
row_296	nfkbiz	null	null	1664	0.866276	0.393899	Yes
row_297	top2b	null	null	1668	0.865127	0.394439	Yes
row_298	slka	null	null	1673	0.863578	0.394871	Yes
row_299	bmp1a	null	null	1690	0.857281	0.39402	Yes
row_300	bnc2	null	null	1692	0.855762	0.394763	Yes
row_301	metrnl	null	null	1699	0.850345	0.39497	Yes
row_302	tssc4	null	null	1706	0.848099	0.395174	Yes
row_303	tnrc5	null	null	1716	0.845109	0.395055	Yes
row_304	atp1b1a	null	null	1719	0.844627	0.395681	Yes
row_305	MDP1	null	null	1724	0.843486	0.396093	Yes
row_306	ywhah	null	null	1728	0.841551	0.39661	Yes
row_307	gfpt1	null	null	1733	0.840695	0.397019	Yes
row_308	actr3	null	null	1745	0.832064	0.396675	Yes
row_309	gba	null	null	1753	0.828886	0.396754	Yes
row_310	grcc10	null	null	1768	0.818649	0.396078	Yes
row_311	col12a1a	null	null	1773	0.813918	0.39646	Yes
row_312	sh3bgrl3	null	null	1777	0.812475	0.396948	Yes
row_313	pdlim5a	null	null	1783	0.810215	0.397221	Yes
row_314	atf3	null	null	1795	0.806726	0.396852	Yes
row_315	rps12	null	null	1813	0.800969	0.395839	Yes
row_316	carhsp1	null	null	1814	0.800946	0.396634	Yes
row_317	rnf150b	null	null	1823	0.797755	0.396575	Yes
row_318	adam10a	null	null	1833	0.795825	0.396408	Yes
row_319	pdcd10b	null	null	1840	0.793494	0.396558	Yes
row_320	ppm1da	null	null	1850	0.789824	0.396385	Yes
row_321	bag3	null	null	1856	0.788586	0.396636	Yes
row_322	lsm12b	null	null	1864	0.786238	0.396673	Yes
row_323	csde1	null	null	1878	0.781744	0.396066	Yes
row_324	sertad4	null	null	1883	0.78032	0.396416	Yes
row_325	stt3a	null	null	1896	0.774651	0.395908	Yes
row_326	ugp2b	null	null	1899	0.773499	0.396464	Yes
row_327	mat2b	null	null	1904	0.772082	0.396805	Yes
row_328	tmco3	null	null	1910	0.770164	0.397038	Yes
row_329	hsp90aa1.1	null	null	1914	0.768348	0.397481	Yes
row_330	filip1l	null	null	1939	0.761587	0.395685	Yes
row_331	tmem214	null	null	1947	0.759031	0.395695	Yes
row_332	puraa	null	null	1956	0.756035	0.395594	Yes
row_333	wwc3	null	null	1969	0.751176	0.395064	Yes
row_334	purab	null	null	1976	0.748171	0.395169	Yes
row_335	fam107b	null	null	1980	0.747076	0.395591	Yes
row_336	aplp2	null	null	1985	0.744757	0.395905	Yes
row_337	gspt1l	null	null	1993	0.74152	0.395897	Yes
row_338	lsm6	null	null	1996	0.740044	0.396419	Yes
row_339	ubap2a	null	null	1998	0.738777	0.397046	Yes
row_340	aprt	null	null	2001	0.738017	0.397566	Yes
row_341	rac1b	null	null	2009	0.735975	0.397552	Yes
row_342	tmem14ca	null	null	2011	0.735424	0.398176	Yes
row_343	prdx2	null	null	2019	0.73342	0.39816	Yes
row_344	chmp6b	null	null	2022	0.73291	0.398675	Yes
row_345	tradd	null	null	2038	0.728514	0.397803	Yes
row_346	sdha	null	null	2052	0.724205	0.39714	Yes
row_347	map2k4a	null	null	2070	0.717855	0.396044	Yes
row_348	bcap31	null	null	2076	0.715287	0.396223	Yes
row_349	rac2	null	null	2077	0.714948	0.396933	Yes
row_350	timp2b	null	null	2085	0.711394	0.396894	Yes
row_351	rnaset2	null	null	2087	0.710727	0.397494	Yes
row_352	lrp11	null	null	2090	0.709385	0.397985	Yes
row_353	si:dkey-13n23.3	null	null	2098	0.707539	0.397943	Yes
row_354	aars	null	null	2108	0.703734	0.397685	Yes
row_355	akirin1	null	null	2109	0.703662	0.398383	Yes
row_356	vac14	null	null	2115	0.702837	0.398549	Yes
row_357	abhd17b	null	null	2119	0.702402	0.398928	Yes
row_358	cdc42	null	null	2120	0.702206	0.399625	Yes
row_359	wnt3	null	null	2146	0.69421	0.397656	No
row_360	rbm26	null	null	2147	0.694055	0.398345	No
row_361	trappc13	null	null	2155	0.692018	0.398287	No
row_362	bbc3	null	null	2159	0.691354	0.398655	No
row_363	psmc5	null	null	2170	0.688101	0.398274	No
row_364	ubap2b	null	null	2182	0.684724	0.397784	No
row_365	ccm2	null	null	2193	0.679467	0.397395	No
row_366	si:dkey-7l6.3	null	null	2198	0.677686	0.397643	No
row_367	carm1	null	null	2207	0.675767	0.397463	No
row_368	strap	null	null	2208	0.674444	0.398133	No
row_369	bsg	null	null	2233	0.66775	0.396243	No
row_370	taok1a	null	null	2234	0.66753	0.396906	No
row_371	tsnax	null	null	2238	0.665825	0.397248	No
row_372	zgc:162613	null	null	2243	0.663495	0.397481	No
row_373	slc25a3b	null	null	2245	0.662342	0.398032	No
row_374	ckbb	null	null	2247	0.660562	0.398582	No
row_375	mlst8	null	null	2267	0.654417	0.397211	No
row_376	plaua	null	null	2280	0.652074	0.396582	No
row_377	cyb5r2	null	null	2283	0.651364	0.397016	No
row_378	hmgcrb	null	null	2298	0.645944	0.396169	No
row_379	tmem258	null	null	2299	0.645649	0.39681	No
row_380	rabac1	null	null	2301	0.645222	0.397344	No
row_381	nabp1a	null	null	2325	0.638565	0.395532	No
row_382	tjp1a	null	null	2333	0.636469	0.39542	No
row_383	heatr3	null	null	2337	0.634378	0.39573	No
row_384	isg20	null	null	2341	0.632856	0.39604	No
row_385	taok1b	null	null	2347	0.630201	0.396134	No
row_386	atp6v1ab	null	null	2350	0.628792	0.396545	No
row_387	xpo6	null	null	2363	0.624897	0.395889	No
row_388	pdcd2l	null	null	2367	0.623549	0.396189	No
row_389	fbxw7	null	null	2373	0.622023	0.396275	No
row_390	cd2ap	null	null	2390	0.61723	0.395187	No
row_391	hspa5	null	null	2406	0.614766	0.394202	No
row_392	elp5	null	null	2408	0.614545	0.394706	No
row_393	tmem120b	null	null	2412	0.613434	0.394996	No
row_394	srpk2	null	null	2416	0.612639	0.395285	No
row_395	cttn	null	null	2417	0.612032	0.395892	No
row_396	itgav	null	null	2432	0.605632	0.395005	No
row_397	sri	null	null	2453	0.60023	0.393474	No
row_398	ing3	null	null	2460	0.599055	0.393431	No
row_399	mcm2	null	null	2469	0.596139	0.393172	No
row_400	caprin1a	null	null	2476	0.594078	0.393123	No
row_401	fth1a	null	null	2481	0.592591	0.393286	No
row_402	nxt2	null	null	2486	0.591715	0.393448	No
row_403	tmem181	null	null	2492	0.589163	0.393502	No
row_404	eml3	null	null	2498	0.588465	0.393554	No
row_405	tm9sf3	null	null	2508	0.586654	0.393179	No
row_406	pdcd5	null	null	2510	0.585838	0.393655	No
row_407	LTN1	null	null	2515	0.584808	0.39381	No
row_408	usp12b	null	null	2518	0.583803	0.394177	No
row_409	psmc1b	null	null	2522	0.583273	0.394437	No
row_410	clpp	null	null	2524	0.582603	0.394909	No
row_411	jun	null	null	2532	0.580735	0.394741	No
row_412	chchd6a	null	null	2536	0.579925	0.394998	No
row_413	rbbp4	null	null	2542	0.578591	0.39504	No
row_414	mapk14a	null	null	2560	0.572901	0.393801	No
row_415	atp5d	null	null	2561	0.57281	0.39437	No
row_416	commd2	null	null	2564	0.57142	0.394725	No
row_417	dohh	null	null	2576	0.568878	0.39412	No
row_418	ptrh1	null	null	2583	0.56632	0.394044	No
row_419	btg3	null	null	2593	0.564178	0.393647	No
row_420	tcp1	null	null	2597	0.562344	0.393886	No
row_421	picalmb	null	null	2599	0.56219	0.394338	No
row_422	hm13	null	null	2617	0.558282	0.393084	No
row_423	mboat2a	null	null	2618	0.558199	0.393639	No
row_424	stam	null	null	2621	0.55638	0.393978	No
row_425	KRT18	null	null	2628	0.555234	0.393891	No
row_426	ptp4a1	null	null	2631	0.554007	0.394229	No
row_427	tfr1b	null	null	2632	0.553717	0.394778	No
row_428	prkar2aa	null	null	2633	0.553273	0.395328	No
row_429	clcn3	null	null	2641	0.551362	0.395131	No
row_430	rad23ab	null	null	2668	0.546121	0.392908	No
row_431	hrasa	null	null	2672	0.545414	0.39313	No
row_432	FKBP15	null	null	2674	0.544884	0.393565	No
row_433	spred1	null	null	2677	0.54467	0.393893	No
row_434	tmem120a	null	null	2681	0.542734	0.394113	No
row_435	tpm3	null	null	2684	0.541662	0.394438	No
row_436	htra1a	null	null	2688	0.540298	0.394655	No
row_437	yod1	null	null	2689	0.540275	0.395192	No
row_438	golph3	null	null	2691	0.540247	0.395622	No
row_439	atp6ap2	null	null	2697	0.538966	0.395625	No
row_440	SLC27A2	null	null	2717	0.535174	0.394136	No
row_441	slc25a46	null	null	2718	0.534907	0.394667	No
row_442	si:dkey-185e18.7	null	null	2719	0.534504	0.395197	No
row_443	mpv17	null	null	2722	0.533752	0.395515	No
row_444	ppm1ba	null	null	2727	0.53193	0.395617	No
row_445	znf185	null	null	2736	0.529847	0.395293	No
row_446	nudt5	null	null	2740	0.52944	0.395499	No
row_447	fam160b1	null	null	2759	0.525303	0.394107	No
row_448	tcea2	null	null	2771	0.521457	0.393455	No
row_449	aldoab	null	null	2789	0.516889	0.39216	No
row_450	pde5aa	null	null	2793	0.515999	0.392353	No
row_451	capn7	null	null	2804	0.515102	0.391801	No
row_452	scyl1	null	null	2828	0.508292	0.38986	No
row_453	amn1	null	null	2837	0.506045	0.389512	No
row_454	naa30	null	null	2840	0.505734	0.389801	No
row_455	eif4ebp1	null	null	2851	0.502953	0.389237	No
row_456	chst10	null	null	2852	0.502479	0.389736	No
row_457	mvp	null	null	2856	0.5015	0.389915	No
row_458	tpp2	null	null	2857	0.500621	0.390412	No
row_459	uros	null	null	2866	0.499235	0.390057	No
row_460	ubr2	null	null	2889	0.492229	0.388206	No
row_461	ddx39b	null	null	2891	0.491976	0.388588	No
row_462	adipor1a	null	null	2894	0.491172	0.388863	No
row_463	phpt1	null	null	2895	0.490886	0.38935	No
row_464	CABZ01087906.1	null	null	2899	0.490273	0.389518	No
row_465	plekhb2	null	null	2901	0.490226	0.389898	No
row_466	atrn	null	null	2904	0.490004	0.390172	No
row_467	atxn7l2a	null	null	2915	0.48829	0.389593	No
row_468	zgc:112962	null	null	2920	0.487036	0.389651	No
row_469	psen2	null	null	2926	0.486505	0.389603	No
row_470	pold1	null	null	2931	0.485354	0.389659	No
row_471	mex3b	null	null	2935	0.48418	0.389821	No
row_472	per2	null	null	2942	0.483347	0.389663	No
row_473	eif3k	null	null	2943	0.482797	0.390142	No
row_474	si:ch211-173p18.3	null	null	2944	0.482552	0.390621	No
row_475	tmem65	null	null	2957	0.480597	0.389822	No
row_476	cutc	null	null	2958	0.48035	0.390299	No
row_477	phb	null	null	2960	0.480255	0.390669	No
row_478	litaf	null	null	2962	0.480021	0.391039	No
row_479	dldh	null	null	2968	0.47872	0.390983	No
row_480	anxa5a	null	null	2976	0.478005	0.390713	No
row_481	gp1bb	null	null	2978	0.477794	0.391081	No
row_482	rc3h2	null	null	2984	0.477114	0.391023	No
row_483	uck2a	null	null	2987	0.476758	0.391284	No
row_484	ccny	null	null	2990	0.476311	0.391544	No
row_485	apaf1	null	null	3000	0.474732	0.391058	No
row_486	coq2	null	null	3015	0.471569	0.390038	No
row_487	mrpl48	null	null	3024	0.468299	0.389652	No
row_488	xylt2	null	null	3029	0.467368	0.38969	No
row_489	hacl1	null	null	3033	0.466696	0.389835	No
row_490	atg101	null	null	3034	0.466372	0.390298	No
row_491	qsox1	null	null	3048	0.462583	0.389374	No
row_492	rab13	null	null	3052	0.461281	0.389513	No
row_493	igf2a	null	null	3053	0.460999	0.389971	No
row_494	extl2	null	null	3070	0.458442	0.388725	No
row_495	msrb3	null	null	3075	0.45731	0.388753	No
row_496	selo	null	null	3077	0.456805	0.389101	No
row_497	tnpo1	null	null	3080	0.456224	0.389341	No
row_498	pcnp	null	null	3090	0.452325	0.388833	No
row_499	tbc1d22a	null	null	3095	0.450572	0.388855	No
row_500	ppp2r1bb	null	null	3106	0.448864	0.388237	No
row_501	adck3	null	null	3108	0.448408	0.388576	No
row_502	NOP14	null	null	3120	0.445669	0.387848	No
row_503	ypel2a	null	null	3125	0.44532	0.387865	No
row_504	tmsb1	null	null	3130	0.444561	0.387881	No
row_505	lcp1	null	null	3133	0.443489	0.388109	No
row_506	col5a2a	null	null	3137	0.442506	0.388229	No
row_507	ddx28	null	null	3161	0.437633	0.386218	No
row_508	tshz3b	null	null	3164	0.43756	0.386439	No
row_509	tspan14	null	null	3166	0.437359	0.386767	No
row_510	klf2b	null	null	3194	0.433668	0.384327	No
row_511	tmem30ab	null	null	3205	0.428777	0.383689	No
row_512	usp48	null	null	3208	0.428478	0.383902	No
row_513	igf1ra	null	null	3215	0.427624	0.383688	No
row_514	mybbp1a	null	null	3216	0.427463	0.384113	No
row_515	uevld	null	null	3226	0.425392	0.383578	No
row_516	pkmyt1	null	null	3240	0.422622	0.382615	No
row_517	med30	null	null	3248	0.42129	0.382289	No
row_518	alms1	null	null	3254	0.420804	0.382175	No
row_519	ddx39ab	null	null	3276	0.418699	0.380357	No
row_520	ppp1r13l	null	null	3282	0.417457	0.38024	No
row_521	snx5	null	null	3296	0.4163	0.379271	No
row_522	aebp2	null	null	3301	0.41574	0.379258	No
row_523	fam96a	null	null	3314	0.412907	0.378392	No
row_524	cbx1a	null	null	3319	0.412487	0.378376	No
row_525	ube2j1	null	null	3342	0.408441	0.376442	No
row_526	arid3b	null	null	3356	0.405433	0.375462	No
row_527	myofl	null	null	3367	0.40298	0.374799	No
row_528	fars2	null	null	3370	0.402754	0.374986	No
row_529	rbm24a	null	null	3372	0.402475	0.37528	No
row_530	sec23a	null	null	3386	0.400729	0.374295	No
row_531	prkar1b	null	null	3391	0.400402	0.374267	No
row_532	fbxw5	null	null	3394	0.400037	0.374452	No
row_533	rragca	null	null	3397	0.399538	0.374636	No
row_534	si:ch1073-55a19.2	null	null	3407	0.397577	0.374073	No
row_535	nudt9	null	null	3409	0.396878	0.374361	No
row_536	mdm2	null	null	3410	0.39679	0.374755	No
row_537	creld2	null	null	3422	0.394171	0.373976	No
row_538	serpine2	null	null	3429	0.393248	0.373729	No
row_539	psma1	null	null	3433	0.393018	0.3738	No
row_540	aamdc	null	null	3434	0.392999	0.37419	No
row_541	pdcd10a	null	null	3443	0.391414	0.373728	No
row_542	dfna5b	null	null	3444	0.391401	0.374116	No
row_543	ppp1r18	null	null	3450	0.389881	0.373972	No
row_544	atg5	null	null	3451	0.389697	0.374359	No
row_545	ctdspl2a	null	null	3453	0.389503	0.374639	No
row_546	b3gnt2a	null	null	3456	0.389182	0.374813	No
row_547	rbpms2b	null	null	3490	0.382828	0.371684	No
row_548	sepw1	null	null	3492	0.38279	0.371957	No
row_549	usp22	null	null	3512	0.377539	0.370312	No
row_550	smyd2a	null	null	3513	0.377533	0.370686	No
row_551	pard6gb	null	null	3523	0.376112	0.370103	No
row_552	lgals2b	null	null	3527	0.375224	0.370156	No
row_553	rb1	null	null	3532	0.374611	0.370103	No
row_554	ascc3	null	null	3534	0.374402	0.370368	No
row_555	MMADHC	null	null	3542	0.373278	0.369994	No
row_556	MRPL49	null	null	3597	0.363697	0.364613	No
row_557	kif5bb	null	null	3601	0.36349	0.364655	No
row_558	ncbp3	null	null	3613	0.361597	0.363844	No
row_559	unc50	null	null	3615	0.36131	0.364097	No
row_560	gmppb	null	null	3617	0.361285	0.364349	No
row_561	chchd4a	null	null	3647	0.353522	0.361616	No
row_562	pim3	null	null	3657	0.351345	0.361008	No
row_563	cdc14ab	null	null	3669	0.348944	0.360185	No
row_564	rap1gap	null	null	3691	0.344572	0.358293	No
row_565	ube2z	null	null	3704	0.341809	0.357357	No
row_566	polr2b	null	null	3707	0.341642	0.357483	No
row_567	sigmar1	null	null	3708	0.341581	0.357822	No
row_568	fam65b	null	null	3709	0.340746	0.358161	No
row_569	esd	null	null	3711	0.34023	0.358392	No
row_570	irf9	null	null	3727	0.338237	0.357133	No
row_571	sf3b1	null	null	3736	0.336739	0.356616	No
row_572	CABZ01111833.1	null	null	3738	0.336349	0.356844	No
row_573	igf2b	null	null	3739	0.336089	0.357178	No
row_574	azin1a	null	null	3745	0.335397	0.356979	No
row_575	insig1	null	null	3750	0.333937	0.356885	No
row_576	itpa	null	null	3751	0.333852	0.357216	No
row_577	usp4	null	null	3760	0.332798	0.356696	No
row_578	laptm4b	null	null	3765	0.331402	0.3566	No
row_579	rpe	null	null	3773	0.329588	0.356183	No
row_580	aqp11	null	null	3775	0.329241	0.356403	No
row_581	lgals3bpb	null	null	3778	0.328656	0.356517	No
row_582	ptk7a	null	null	3785	0.327244	0.356203	No
row_583	RABL6	null	null	3788	0.326517	0.356315	No
row_584	fbl	null	null	3789	0.326332	0.356639	No
row_585	bub3	null	null	3803	0.322386	0.355577	No
row_586	slc2a3b	null	null	3805	0.321611	0.355789	No
row_587	lrig1	null	null	3820	0.317581	0.354616	No
row_588	ppp1r10	null	null	3842	0.314418	0.352695	No
row_589	zfand5a	null	null	3851	0.312406	0.352154	No
row_590	bloc1s2	null	null	3857	0.311433	0.351932	No
row_591	scarb1	null	null	3871	0.309303	0.350857	No
row_592	socs3b	null	null	3880	0.308231	0.350312	No
row_593	esr1	null	null	3901	0.304294	0.348487	No
row_594	tnip2	null	null	3919	0.302073	0.346979	No
row_595	sars2	null	null	3934	0.298885	0.345787	No
row_596	cul2	null	null	3946	0.297763	0.344913	No
row_597	h2afy2	null	null	3955	0.295997	0.344356	No
row_598	gar1	null	null	3968	0.293784	0.343372	No
row_599	badb	null	null	3970	0.293645	0.343557	No
row_600	pdia5	null	null	3980	0.291855	0.34289	No
row_601	sap130a	null	null	3983	0.291104	0.342966	No
row_602	wdr33	null	null	3984	0.290787	0.343255	No
row_603	fbxo22	null	null	3985	0.290492	0.343543	No
row_604	hnrnpaba	null	null	3996	0.289088	0.342767	No
row_605	ilf3b	null	null	3999	0.288989	0.342841	No
row_606	nedd9	null	null	4025	0.284065	0.340465	No
row_607	rpl22	null	null	4038	0.282238	0.339469	No
row_608	mrps5	null	null	4041	0.281479	0.339535	No
row_609	git1	null	null	4044	0.280923	0.339602	No
row_610	btg1	null	null	4053	0.279724	0.339029	No
row_611	cryz	null	null	4055	0.279665	0.3392	No
row_612	chchd6b	null	null	4068	0.278001	0.3382	No
row_613	atp11c	null	null	4072	0.276939	0.338156	No
row_614	bnip3la	null	null	4073	0.276399	0.33843	No
row_615	rp9	null	null	4075	0.276021	0.338598	No
row_616	cmtm6	null	null	4080	0.274241	0.338445	No
row_617	kif1b	null	null	4099	0.270135	0.336799	No
row_618	riok3	null	null	4114	0.26815	0.335576	No
row_619	PLIN3	null	null	4115	0.268043	0.335842	No
row_620	mybphb	null	null	4117	0.267499	0.336002	No
row_621	hnrnpr	null	null	4122	0.266614	0.335841	No
row_622	spout1	null	null	4123	0.266613	0.336106	No
row_623	mettl1	null	null	4147	0.261691	0.33392	No
row_624	oxr1a	null	null	4149	0.261156	0.334073	No
row_625	wdr55	null	null	4153	0.260681	0.334012	No
row_626	CTBP1	null	null	4165	0.258165	0.333099	No
row_627	baiap2l1b	null	null	4168	0.257629	0.333142	No
row_628	ube2ka	null	null	4177	0.255681	0.332545	No
row_629	gmds	null	null	4178	0.255468	0.332799	No
row_630	abcb6a	null	null	4181	0.254777	0.332839	No
row_631	tead3b	null	null	4187	0.253425	0.332559	No
row_632	ctbp2a	null	null	4193	0.252547	0.332278	No
row_633	glipr2l	null	null	4202	0.251086	0.331676	No
row_634	ndufaf2	null	null	4203	0.250774	0.331925	No
row_635	pdhx	null	null	4222	0.246917	0.330257	No
row_636	hmgcs1	null	null	4230	0.245529	0.329756	No
row_637	dhrs13a.3	null	null	4234	0.245009	0.32968	No
row_638	calcoco1a	null	null	4246	0.242263	0.328751	No
row_639	trmt11	null	null	4248	0.241224	0.328884	No
row_640	skp1	null	null	4268	0.237939	0.3271	No
row_641	brox	null	null	4269	0.237789	0.327336	No
row_642	ctns	null	null	4285	0.234822	0.325974	No
row_643	efr3a	null	null	4288	0.234065	0.325994	No
row_644	mxra8a	null	null	4299	0.232464	0.325161	No
row_645	stmn1a	null	null	4312	0.230311	0.324114	No
row_646	casp3b	null	null	4323	0.228752	0.323277	No
row_647	slc35a3a	null	null	4335	0.226844	0.322333	No
row_648	trmt61b	null	null	4346	0.224488	0.321492	No
row_649	rbms2a	null	null	4349	0.224159	0.321502	No
row_650	nus1	null	null	4363	0.22165	0.32034	No
row_651	eif2b5	null	null	4365	0.221319	0.320453	No
row_652	rnf130	null	null	4373	0.220657	0.319928	No
row_653	rcc1	null	null	4380	0.217926	0.319506	No
row_654	KRTCAP2	null	null	4402	0.213421	0.317485	No
row_655	tmem222a	null	null	4413	0.211268	0.316631	No
row_656	chst2a	null	null	4425	0.208376	0.315668	No
row_657	ece2b	null	null	4439	0.205707	0.31449	No
row_658	psen1	null	null	4440	0.205546	0.314694	No
row_659	ccnc	null	null	4443	0.204776	0.314685	No
row_660	tmed3	null	null	4444	0.20441	0.314888	No
row_661	sec24b	null	null	4447	0.203812	0.314877	No
row_662	nacc2	null	null	4449	0.203199	0.314973	No
row_663	csnk2a2a	null	null	4460	0.201414	0.314109	No
row_664	rnf6	null	null	4464	0.20111	0.31399	No
row_665	cdc14b	null	null	4474	0.199399	0.313231	No
row_666	rexo4	null	null	4475	0.199363	0.313429	No
row_667	rplp2l	null	null	4502	0.192287	0.310855	No
row_668	CABZ01092944.1	null	null	4505	0.192082	0.310833	No
row_669	ubl3a	null	null	4506	0.191775	0.311023	No
row_670	aldh9a1a.1	null	null	4525	0.189361	0.309297	No
row_671	nthl1	null	null	4537	0.185628	0.308312	No
row_672	sdhb	null	null	4541	0.1852	0.308177	No
row_673	CABZ01055522.1	null	null	4562	0.181381	0.30623	No
row_674	ckap5	null	null	4565	0.18113	0.306197	No
row_675	gmcl1	null	null	4571	0.180576	0.305845	No
row_676	hnrnpa0l	null	null	4572	0.180124	0.306024	No
row_677	scmh1	null	null	4575	0.179935	0.30599	No
row_678	myo5ab	null	null	4584	0.177401	0.305315	No
row_679	fbxo9	null	null	4587	0.177178	0.305278	No
row_680	copa	null	null	4590	0.176802	0.305241	No
row_681	tob1b	null	null	4592	0.176683	0.30531	No
row_682	fth1b	null	null	4612	0.174733	0.303463	No
row_683	mccc1	null	null	4620	0.173719	0.302891	No
row_684	xrcc5	null	null	4627	0.173223	0.302425	No
row_685	spg21	null	null	4628	0.172999	0.302597	No
row_686	klf2a	null	null	4639	0.170587	0.301703	No
row_687	mcrs1	null	null	4658	0.16762	0.299955	No
row_688	fibpa	null	null	4668	0.166273	0.299163	No
row_689	mis12	null	null	4669	0.166174	0.299328	No
row_690	aldh7a1	null	null	4670	0.165793	0.299493	No
row_691	pid1	null	null	4687	0.164574	0.297955	No
row_692	AC024175.23	null	null	4695	0.163198	0.297372	No
row_693	acox3	null	null	4698	0.162931	0.297321	No
row_694	smpd1	null	null	4706	0.162007	0.296738	No
row_695	fam89a	null	null	4731	0.159399	0.294344	No
row_696	btbd10a	null	null	4732	0.159385	0.294502	No
row_697	ppp1r14bb	null	null	4735	0.158989	0.294447	No
row_698	cdv3	null	null	4740	0.158535	0.294179	No
row_699	mrpl21	null	null	4777	0.154096	0.290504	No
row_700	ccnyl1	null	null	4793	0.152709	0.289061	No
row_701	znf593	null	null	4820	0.149008	0.286444	No
row_702	gna13b	null	null	4827	0.1486	0.285953	No
row_703	hnrnpub	null	null	4832	0.148049	0.285675	No
row_704	chst7	null	null	4835	0.147836	0.285609	No
row_705	ddx3a	null	null	4855	0.14589	0.283734	No
row_706	rdh10a	null	null	4867	0.143838	0.282707	No
row_707	usp1	null	null	4877	0.142667	0.281891	No
row_708	scrib	null	null	4886	0.141387	0.281181	No
row_709	ccne1	null	null	4888	0.141093	0.281215	No
row_710	abcc4	null	null	4892	0.140926	0.281035	No
row_711	arpc2	null	null	4894	0.140254	0.281068	No
row_712	kin	null	null	4922	0.136513	0.278333	No
row_713	casp6	null	null	4939	0.134541	0.276765	No
row_714	dhrs4	null	null	4942	0.134303	0.276686	No
row_715	KIF1C	null	null	4953	0.132651	0.275754	No
row_716	slco2a1	null	null	4959	0.132176	0.275353	No
row_717	stom	null	null	4961	0.131754	0.275378	No
row_718	ankra2	null	null	4966	0.130965	0.275083	No
row_719	dnajc21	null	null	4971	0.130458	0.274787	No
row_720	ddb2	null	null	4972	0.130283	0.274916	No
row_721	srek1ip1	null	null	4991	0.127312	0.273128	No
row_722	pdlim1	null	null	4996	0.126879	0.272829	No
row_723	araf	null	null	4998	0.126758	0.272848	No
row_724	ndufaf4	null	null	5004	0.126379	0.272442	No
row_725	apc	null	null	5016	0.125487	0.271397	No
row_726	abcc2	null	null	5022	0.124837	0.270989	No
row_727	pdrg1	null	null	5023	0.124719	0.271113	No
row_728	dag1	null	null	5025	0.124606	0.271131	No
row_729	pgm2	null	null	5066	0.120858	0.266997	No
row_730	dkc1	null	null	5073	0.120529	0.266479	No
row_731	rpl13	null	null	5086	0.119106	0.265321	No
row_732	timm9	null	null	5087	0.119052	0.265439	No
row_733	nfkb1	null	null	5095	0.118478	0.264812	No
row_734	poc1b	null	null	5096	0.118406	0.26493	No
row_735	dnajb14	null	null	5098	0.118203	0.264941	No
row_736	hrsp12	null	null	5103	0.117778	0.264632	No
row_737	rrm2	null	null	5111	0.116511	0.264004	No
row_738	fam198b	null	null	5131	0.115305	0.262098	No
row_739	zbtb2a	null	null	5134	0.115149	0.261999	No
row_740	mrs2	null	null	5136	0.115116	0.262007	No
row_741	ezh2	null	null	5145	0.114284	0.26127	No
row_742	dnajc9	null	null	5146	0.114129	0.261383	No
row_743	htra1b	null	null	5148	0.113962	0.26139	No
row_744	mcm7	null	null	5153	0.11364	0.261078	No
row_745	tmem51a	null	null	5171	0.112464	0.259382	No
row_746	rangrf	null	null	5180	0.111575	0.258642	No
row_747	mapk1	null	null	5197	0.109661	0.257049	No
row_748	dek	null	null	5203	0.109013	0.256626	No
row_749	chsy1	null	null	5212	0.108358	0.255882	No
row_750	tgfb1a	null	null	5219	0.107733	0.255351	No
row_751	znf653	null	null	5222	0.107513	0.255245	No
row_752	sdf2l1	null	null	5235	0.106646	0.254075	No
row_753	lmf2a	null	null	5237	0.106553	0.254075	No
row_754	nsmaf	null	null	5242	0.10565	0.253754	No
row_755	abhd3	null	null	5246	0.105063	0.253539	No
row_756	sgf29	null	null	5259	0.103891	0.252367	No
row_757	sfxn2	null	null	5264	0.103753	0.252044	No
row_758	smim19	null	null	5265	0.103501	0.252147	No
row_759	mrpl52	null	null	5266	0.10344	0.25225	No
row_760	dusp4	null	null	5270	0.10298	0.252033	No
row_761	dnajb12a	null	null	5294	0.100715	0.249687	No
row_762	abi2b	null	null	5300	0.100381	0.249255	No
row_763	sclt1	null	null	5302	0.100228	0.249248	No
row_764	ndufaf1	null	null	5303	0.100188	0.249348	No
row_765	wwox	null	null	5305	0.099997	0.249341	No
row_766	zgc:112255	null	null	5317	0.0989086	0.248269	No
row_767	lepr	null	null	5322	0.0984725	0.247942	No
row_768	myo5aa	null	null	5334	0.0973133	0.246868	No
row_769	tmed4	null	null	5359	0.0946587	0.24441	No
row_770	CABZ01056727.1	null	null	5360	0.0946097	0.244504	No
row_771	ppp1r7	null	null	5365	0.0941954	0.244172	No
row_772	casp3a	null	null	5368	0.0939807	0.244053	No
row_773	zgc:63733	null	null	5391	0.0917412	0.241805	No
row_774	fbxo28	null	null	5405	0.0905118	0.240512	No
row_775	clpxb	null	null	5411	0.0900826	0.24007	No
row_776	mbd3b	null	null	5412	0.0900178	0.240159	No
row_777	vamp4	null	null	5414	0.0899887	0.240142	No
row_778	trak2	null	null	5419	0.0895599	0.239806	No
row_779	znf277	null	null	5426	0.0890027	0.239256	No
row_780	wacb	null	null	5457	0.0858304	0.236151	No
row_781	cnep1r1	null	null	5462	0.0853325	0.235811	No
row_782	mrpl40	null	null	5463	0.0853041	0.235895	No
row_783	ptk2bb	null	null	5481	0.0835231	0.23417	No
row_784	osgep	null	null	5484	0.0832936	0.23404	No
row_785	vps36	null	null	5496	0.0817566	0.232952	No
row_786	prune	null	null	5520	0.0797632	0.230585	No
row_787	BLOC1S5-TXNDC5	null	null	5535	0.0790447	0.229175	No
row_788	cdk9	null	null	5539	0.0786714	0.228934	No
row_789	rpl32	null	null	5547	0.0776947	0.228267	No
row_790	BPHL	null	null	5549	0.0775774	0.228238	No
row_791	chchd7	null	null	5552	0.0763208	0.228101	No
row_792	usf2	null	null	5554	0.0762366	0.22807	No
row_793	CABZ01058720.1	null	null	5569	0.0745305	0.226655	No
row_794	ccnd2a	null	null	5573	0.0742499	0.22641	No
row_795	hnrnpa3	null	null	5606	0.071263	0.223078	No
row_796	tmem11	null	null	5616	0.070088	0.22219	No
row_797	baiap2l1a	null	null	5623	0.069356	0.221621	No
row_798	arhgef1a	null	null	5633	0.0680059	0.220732	No
row_799	parp12b	null	null	5646	0.0663165	0.219521	No
row_800	mycbp2	null	null	5656	0.065617	0.21863	No
row_801	ccdc12	null	null	5661	0.065151	0.218269	No
row_802	PXMP4	null	null	5678	0.0634051	0.21663	No
row_803	APBA3	null	null	5679	0.0633494	0.216693	No
row_804	rprd1b	null	null	5680	0.063282	0.216756	No
row_805	tbx2b	null	null	5686	0.0627525	0.216287	No
row_806	deaf1	null	null	5692	0.0619717	0.215817	No
row_807	gabarapl2	null	null	5705	0.0606063	0.214601	No
row_808	p3h3	null	null	5710	0.0598955	0.214235	No
row_809	rad51	null	null	5713	0.059841	0.214082	No
row_810	rpl34	null	null	5719	0.0591926	0.213609	No
row_811	phf14	null	null	5720	0.0591878	0.213667	No
row_812	paqr3a	null	null	5747	0.0555382	0.210958	No
row_813	armc5	null	null	5751	0.0551333	0.210693	No
row_814	trmt2a	null	null	5761	0.053812	0.20979	No
row_815	smad3b	null	null	5772	0.0528751	0.208779	No
row_816	coa6	null	null	5774	0.052777	0.208725	No
row_817	sp3a	null	null	5781	0.0520352	0.208139	No
row_818	smyd2b	null	null	5783	0.0518305	0.208084	No
row_819	sf3a2	null	null	5788	0.0512656	0.207709	No
row_820	ilf3a	null	null	5806	0.0501174	0.205951	No
row_821	perp	null	null	5810	0.0499803	0.205682	No
row_822	gnas	null	null	5813	0.0496128	0.205518	No
row_823	npepps	null	null	5825	0.0487966	0.204397	No
row_824	CAPN1	null	null	5834	0.0476074	0.203594	No
row_825	adam9	null	null	5842	0.04712	0.202896	No
row_826	tgfbi	null	null	5850	0.0467177	0.202198	No
row_827	jazf1b	null	null	5863	0.0456338	0.200967	No
row_828	pik3cb	null	null	5868	0.0444174	0.200586	No
row_829	gnl3	null	null	5869	0.0440883	0.20063	No
row_830	arfgef2	null	null	5872	0.0437484	0.200461	No
row_831	fam96b	null	null	5873	0.0437313	0.200504	No
row_832	unc45b	null	null	5893	0.0417748	0.198525	No
row_833	rnf11b	null	null	5902	0.0412766	0.197715	No
row_834	ubp1	null	null	5913	0.0406445	0.196692	No
row_835	jak2b	null	null	5916	0.0403144	0.19652	No
row_836	polr3c	null	null	5921	0.040037	0.196134	No
row_837	kcmf1	null	null	5926	0.0394351	0.195748	No
row_838	abcc1	null	null	5930	0.0392828	0.195468	No
row_839	ctsh	null	null	5954	0.0369991	0.193059	No
row_840	lgals3bpa	null	null	5970	0.0358861	0.191499	No
row_841	cap1	null	null	5988	0.0345694	0.189726	No
row_842	elmod2	null	null	5992	0.0342948	0.189441	No
row_843	faf1	null	null	5996	0.0341287	0.189156	No
row_844	jak2a	null	null	6004	0.0338243	0.188445	No
row_845	cobl	null	null	6008	0.0337165	0.18816	No
row_846	pspc1	null	null	6011	0.0334625	0.18798	No
row_847	ewsr1a	null	null	6045	0.0310401	0.184502	No
row_848	myo6a	null	null	6047	0.0307774	0.184426	No
row_849	axin1	null	null	6048	0.0307337	0.184457	No
row_850	mrps34	null	null	6052	0.0303844	0.184168	No
row_851	tjp2a	null	null	6064	0.0292444	0.183027	No
row_852	auh	null	null	6080	0.0279993	0.18146	No
row_853	smim14	null	null	6087	0.0271474	0.180849	No
row_854	cnppd1	null	null	6093	0.0267835	0.180344	No
row_855	pcyt1aa	null	null	6095	0.0266921	0.180264	No
row_856	ythdc1	null	null	6112	0.0257976	0.178588	No
row_857	bod1	null	null	6113	0.0256861	0.178613	No
row_858	cpt2	null	null	6114	0.0256191	0.178639	No
row_859	gne	null	null	6134	0.0244397	0.176643	No
row_860	pip4k2aa	null	null	6140	0.0237957	0.176135	No
row_861	apex1	null	null	6141	0.0237406	0.176158	No
row_862	pcgf1	null	null	6142	0.0237058	0.176182	No
row_863	ago1	null	null	6149	0.0232553	0.175567	No
row_864	tm7sf2	null	null	6157	0.0229582	0.174845	No
row_865	fam65a	null	null	6179	0.0221068	0.172634	No
row_866	kif1bp	null	null	6180	0.0218496	0.172656	No
row_867	sod2	null	null	6193	0.0207828	0.1714	No
row_868	mgst3b	null	null	6197	0.0207271	0.171102	No
row_869	gulp1b	null	null	6198	0.0205063	0.171122	No
row_870	pex7	null	null	6199	0.0205053	0.171143	No
row_871	tspan5a	null	null	6204	0.0200674	0.170737	No
row_872	spns1	null	null	6213	0.0195152	0.169906	No
row_873	ppargc1b	null	null	6215	0.0194361	0.169819	No
row_874	cdk2	null	null	6228	0.0187399	0.168561	No
row_875	phax	null	null	6235	0.0184944	0.167942	No
row_876	usp12a	null	null	6236	0.0184657	0.16796	No
row_877	zfand6	null	null	6241	0.0181203	0.167553	No
row_878	armc8	null	null	6247	0.01751	0.167038	No
row_879	mtr	null	null	6257	0.0170599	0.166098	No
row_880	akt1	null	null	6268	0.0160941	0.165051	No
row_881	ippk	null	null	6271	0.0160171	0.164854	No
row_882	camk2d1	null	null	6276	0.0151893	0.164444	No
row_883	itm2ba	null	null	6284	0.0147332	0.163714	No
row_884	acvrl1	null	null	6301	0.0136593	0.162026	No
row_885	prmt6	null	null	6315	0.0131313	0.160657	No
row_886	mapkapk5	null	null	6340	0.0113277	0.158116	No
row_887	srebf1	null	null	6343	0.0112526	0.157915	No
row_888	cxcr4a	null	null	6351	0.0106751	0.157181	No
row_889	msmo1	null	null	6354	0.0102293	0.156978	No
row_890	zmpste24	null	null	6363	0.00945066	0.156137	No
row_891	tusc3	null	null	6376	0.00830868	0.154869	No
row_892	srsf3b	null	null	6395	0.00720223	0.152962	No
row_893	tjp2b	null	null	6399	0.00699499	0.15265	No
row_894	atr	null	null	6435	0.00482535	0.148933	No
row_895	zmym2	null	null	6439	0.00468604	0.148619	No
row_896	chga	null	null	6451	0.00380057	0.147453	No
row_897	itfg2	null	null	6458	0.00359403	0.146818	No
row_898	plk2a	null	null	6463	0.00330176	0.146396	No
row_899	ical1	null	null	6472	0.0027935	0.145548	No
row_900	nrp1a	null	null	6475	0.00252491	0.145338	No
row_901	vps26b	null	null	6481	0.00191636	0.144808	No
row_902	ttpal	null	null	6493	0.000968449	0.14364	No
row_903	phtf2	null	null	6504	0	0.142576	No
row_904	ninj2	null	null	6524	0	0.140556	No
row_905	lmf2b	null	null	6527	0	0.140343	No
row_906	cped1	null	null	6529	0	0.140237	No
row_907	dyrk2	null	null	6533	0	0.139918	No
row_908	smo	null	null	6538	0	0.139492	No
row_909	large	null	null	6582	0	0.13492	No
row_910	zgc:113921	null	null	6588	0	0.134388	No
row_911	rela	null	null	6589	0	0.134388	No
row_912	sdhaf2	null	null	6599	0	0.133431	No
row_913	clpxa	null	null	6600	0	0.133431	No
row_914	zdhhc13	null	null	6603	0	0.133219	No
row_915	map4k2	null	null	6604	0	0.133219	No
row_916	arl2	null	null	6614	0	0.132261	No
row_917	serpine1	null	null	6615	0	0.132261	No
row_918	gpatch1	null	null	6626	0	0.131198	No
row_919	tcf12	null	null	6644	0	0.12939	No
row_920	fadd	null	null	6648	0	0.129071	No
row_921	nadsyn1	null	null	6649	0	0.129071	No
row_922	chmp5b	null	null	6658	0	0.128221	No
row_923	ddrgk1	null	null	6671	0	0.126945	No
row_924	gps2	null	null	6689	0	0.125137	No
row_925	atf5a	null	null	6701	0	0.123967	No
row_926	kptn	null	null	6713	0	0.122797	No
row_927	cdc26	null	null	6732	0	0.120883	No
row_928	trap1	null	null	6754	0	0.11865	No
row_929	fam173a	null	null	6763	0	0.1178	No
row_930	tbc1d16	null	null	6772	0	0.116949	No
row_931	cbx4	null	null	6773	0	0.116949	No
row_932	desi1a	null	null	6780	0	0.116311	No
row_933	setd1a	null	null	6791	0	0.115247	No
row_934	tubg1	null	null	6799	0	0.114503	No
row_935	alyref	null	null	6819	0	0.112483	No
row_936	ntan1	null	null	6829	0	0.111526	No
row_937	tpra1	null	null	6830	0	0.111526	No
row_938	stk24b	null	null	6840	0	0.110569	No
row_939	plxnb1b	null	null	6846	0	0.110037	No
row_940	utp6	null	null	6849	0	0.109824	No
row_941	ip6k2b	null	null	6867	0	0.108016	No
row_942	vapb	null	null	6878	0	0.106953	No
row_943	abhd14b	null	null	6882	0	0.106634	No
row_944	smpd2b	null	null	6885	0	0.106421	No
row_945	ncoa5	null	null	6889	0	0.106102	No
row_946	abcd3b	null	null	6906	0	0.104401	No
row_947	col11a1b	null	null	6907	0	0.104401	No
row_948	st3gal3b	null	null	6911	0	0.104082	No
row_949	ptprfb	null	null	6912	0	0.104082	No
row_950	klhl18	null	null	6928	0	0.102487	No
row_951	plk3	null	null	6933	0	0.102062	No
row_952	MYADM	null	null	6937	0	0.101743	No
row_953	exoc3	null	null	6957	0	0.0997221	No
row_954	fyco1b	null	null	6958	0	0.0997221	No
row_955	THEM6	null	null	6959	0	0.0997221	No
row_956	g3bp2	null	null	6985	0	0.0970637	No
row_957	rcbtb1	null	null	6999	0	0.0956813	No
row_958	hadh	null	null	7002	0	0.0954686	No
row_959	pgam1b	null	null	7011	0	0.0946179	No
row_960	abi2a	null	null	7027	0	0.0930229	No
row_961	abcb6b	null	null	7029	0	0.0929165	No
row_962	rgcc	null	null	7030	0	0.0929165	No
row_963	il17d	null	null	7032	0	0.0928102	No
row_964	rab5b	null	null	7042	0	0.0918531	No
row_965	dcaf6	null	null	7053	0	0.0907898	No
row_966	ralba	null	null	7057	0	0.0904708	No
row_967	tbl1x	null	null	7066	0	0.0896201	No
row_968	rpa2	null	null	7072	0	0.0890884	No
row_969	ube2s	null	null	7081	0	0.0882377	No
row_970	emg1	null	null	7085	0	0.0879187	No
row_971	ccdc106a	null	null	7087	0	0.0878123	No
row_972	fbxo32	null	null	7096	0	0.0869616	No
row_973	abcb4	null	null	7101	0	0.0865363	No
row_974	gpatch4	null	null	7102	0	0.0865363	No
row_975	prpf31	null	null	7104	0	0.0864299	No
row_976	kpna5	null	null	7106	0	0.0863236	No
row_977	stt3b	null	null	7115	0	0.0854729	No
row_978	ndufaf6	null	null	7118	0	0.0852602	No
row_979	scap	null	null	7119	0	0.0852602	No
row_980	ypel5	null	null	7131	0	0.0840905	No
row_981	sprtn	null	null	7136	0	0.0836651	No
row_982	CRIP2	null	null	7139	0	0.0834525	No
row_983	map3k7	null	null	7153	0	0.0820701	No
row_984	sesn1	null	null	7159	0	0.0815384	No
row_985	mgat2	null	null	7191	0	0.0782419	No
row_986	trim33	null	null	7208	0	0.0765405	No
row_987	fnbp1l	null	null	7216	0	0.0757961	No
row_988	tor3a	null	null	7217	0	0.0757961	No
row_989	mpnd	null	null	7224	0	0.0751581	No
row_990	nt5dc2	null	null	7235	0	0.0740947	No
row_991	ptpn1	null	null	7243	0	0.0733504	No
row_992	adipor1b	null	null	7244	0	0.0733504	No
row_993	pop5	null	null	7253	0	0.0724997	No
row_994	mtor	null	null	7257	0	0.0721807	No
row_995	slc25a37	null	null	7262	0	0.0717553	No
row_996	ubiad1	null	null	7271	0	0.0709046	No
row_997	bicc1a	null	null	7290	0	0.0689905	No
row_998	wdr1	null	null	7321	0	0.0658004	No
row_999	clk4a	null	null	7329	0	0.065056	No
row_1000	hnrnph1	null	null	7330	0	0.065056	No
row_1001	stx3a	null	null	7341	0	0.0639927	No
row_1002	nudcd2	null	null	7343	0	0.0638863	No
row_1003	csnk1a1	null	null	7359	0	0.0622913	No
row_1004	ccna2	null	null	7370	0	0.0612279	No
row_1005	igfbp7	null	null	7374	0	0.0609089	No
row_1006	tuba4l	null	null	7387	0	0.0596328	No
row_1007	gbf1	null	null	7388	0	0.0596328	No
row_1008	znf511	null	null	7405	0	0.0579314	No
row_1009	slc17a5	null	null	7406	0	0.0579314	No
row_1010	zdhhc16a	null	null	7413	0	0.0572934	No
row_1011	mnat1	null	null	7415	0	0.057187	No
row_1012	erlec1	null	null	7419	0	0.056868	No
row_1013	pcnx	null	null	7422	0	0.0566554	No
row_1014	zfand3	null	null	7432	0	0.0556983	No
row_1015	larp6	null	null	7439	0	0.0550603	No
row_1016	nup205	null	null	7450	0	0.0539969	No
row_1017	tbxas1	null	null	7451	0	0.0539969	No
row_1018	siah1	null	null	7458	0	0.0533589	No
row_1019	hacd3	null	null	7459	0	0.0533589	No
row_1020	tspan18b	null	null	7471	0	0.0521892	No
row_1021	abcc3	null	null	7491	0	0.0501688	No
row_1022	p4ha1a	null	null	7499	0	0.0494244	No
row_1023	mki67	null	null	7500	0	0.0494244	No
row_1024	top2a	null	null	7502	0	0.0493181	No
row_1025	desi1b	null	null	7510	0	0.0485737	No
row_1026	mxra7	null	null	7512	0	0.0484673	No
row_1027	cbx1b	null	null	7526	0	0.047085	No
row_1028	birc5a	null	null	7531	0	0.0466596	No
row_1029	oat	null	null	7538	0	0.0460216	No
row_1030	mrpl9	null	null	7557	0	0.0441075	No
row_1031	p3h4	null	null	7574	0	0.0424061	No
row_1032	ddah2	null	null	7575	0	0.0424061	No
row_1033	dfna5a	null	null	7580	0	0.0419807	No
row_1034	chtopa	null	null	7584	0	0.0416617	No
row_1035	znrd1	null	null	7587	0	0.0414491	No
row_1036	bet1	null	null	7601	0	0.0400667	No
row_1037	bud23	null	null	7612	0	0.0390033	No
row_1038	rab30	null	null	7620	0	0.0382589	No
row_1039	mrpl28	null	null	7626	0	0.0377272	No
row_1040	nrip1a	null	null	7647	0	0.0356005	No
row_1041	inpp5ka	null	null	7654	0	0.0349625	No
row_1042	aar2	null	null	7668	0	0.0335801	No
row_1043	srsf6a	null	null	7669	0	0.0335801	No
row_1044	mybpha	null	null	7674	0	0.0331547	No
row_1045	ppp4r2a	null	null	7685	0	0.0320913	No
row_1046	icmt	null	null	7699	0	0.0307089	No
row_1047	ptpn11b	null	null	7702	0	0.0304963	No
row_1048	epha2b	null	null	7703	0	0.0304963	No
row_1049	srm	null	null	7711	0	0.0297519	No
row_1050	gpx7	null	null	7737	0	0.0270935	No
row_1051	dlgap4a	null	null	7739	0	0.0269871	No
row_1052	ulk1b	null	null	7760	0	0.0248604	No
row_1053	cdc23	null	null	7778	0	0.0230526	No
row_1054	taf9	null	null	7784	0	0.0225209	No
row_1055	TCERG1	null	null	7789	0	0.0220956	No
row_1056	ankrd46a	null	null	7792	0	0.0218829	No
row_1057	oclna	null	null	7801	0	0.0210322	No
row_1058	enoph1	null	null	7805	0	0.0207132	No
row_1059	syk	null	null	7807	0	0.0206069	No
row_1060	fam136a	null	null	7809	0	0.0205005	No
row_1061	prkab1a	null	null	7820	0	0.0194372	No
row_1062	ccna1	null	null	7830	0	0.0184801	No
row_1063	phldb2a	null	null	7832	0	0.0183738	No
row_1064	nrip1b	null	null	7834	0	0.0182674	No
row_1065	ei24	null	null	7836	0	0.0181611	No
row_1066	git2b	null	null	7837	0	0.0181611	No
row_1067	slc2a10	null	null	7849	0	0.0169914	No
row_1068	cnpy2	null	null	7850	0	0.0169914	No
row_1069	uba3	null	null	7869	0	0.0150773	No
row_1070	map1lc3a	null	null	7875	0	0.0145456	No
row_1071	NINJ1	null	null	7883	0	0.0138013	No
row_1072	uba5	null	null	7901	0	0.0119935	No
row_1073	zmynd11	null	null	7924	0	0.00965408	No
row_1074	ptbp2a	null	null	7927	0	0.0094414	No
row_1075	abcd3a	null	null	7932	0	0.00901605	No
row_1076	tsr3	null	null	7938	0	0.00848436	No
row_1077	si:ch211-231f6.6	null	null	7940	0	0.00837803	No
row_1078	atad3	null	null	7950	0	0.00742099	No
row_1079	gde1	null	null	8002	0	0.00199776	No
row_1080	adam10b	null	null	8012	0	0.00104072	No
row_1081	cnot1	null	null	8033	0	-0.00108603	No
row_1082	e2f4	null	null	8035	0	-0.00119237	No
row_1083	fnbp4	null	null	8040	0	-0.00161772	No
row_1084	dus2	null	null	8053	0	-0.00289377	No
row_1085	SLC9A3R1	null	null	8066	0	-0.00416983	No
row_1086	CABZ01085052.1	null	null	8067	0	-0.00416983	No
row_1087	RPS27L	null	null	8077	0	-0.00512686	No
row_1088	CABZ01117173.1	null	null	8088	0	-0.00619024	No
row_1089	ube3b	null	null	8099	-4.92e-05	-0.00725357	No
row_1090	mtm1	null	null	8102	-0.00144734	-0.00746481	No
row_1091	ctdnep1b	null	null	8111	-0.00294974	-0.00831258	No
row_1092	manf	null	null	8116	-0.00427823	-0.00873369	No
row_1093	zzef1	null	null	8124	-0.00612303	-0.00947197	No
row_1094	fbxo8	null	null	8129	-0.00706946	-0.00989031	No
row_1095	rock1	null	null	8174	-0.0158784	-0.0145534	No
row_1096	yif1a	null	null	8175	-0.0160588	-0.0145375	No
row_1097	dnajb6a	null	null	8176	-0.0161161	-0.0145215	No
row_1098	apbb1	null	null	8189	-0.0193442	-0.0157783	No
row_1099	ppp1r35	null	null	8210	-0.023545	-0.0178817	No
row_1100	znf706	null	null	8212	-0.0243167	-0.0179639	No
row_1101	socs3a	null	null	8216	-0.0249224	-0.0182582	No
row_1102	sec24a	null	null	8241	-0.0306886	-0.0207798	No
row_1103	pigo	null	null	8247	-0.031333	-0.0212804	No
row_1104	thbs1b	null	null	8249	-0.0314288	-0.0213555	No
row_1105	exoc6	null	null	8254	-0.0330832	-0.021748	No
row_1106	fam91a1	null	null	8256	-0.0335902	-0.021821	No
row_1107	prkab1b	null	null	8258	-0.034077	-0.0218935	No
row_1108	rps27.2	null	null	8267	-0.0353503	-0.0227091	No
row_1109	nek7	null	null	8269	-0.0358371	-0.0227799	No
row_1110	ndfip2	null	null	8280	-0.0395738	-0.023804	No
row_1111	rps6ka1	null	null	8285	-0.0402315	-0.0241894	No
row_1112	tp53bp1	null	null	8290	-0.0417108	-0.0245733	No
row_1113	gcdhb	null	null	8292	-0.0418543	-0.0246381	No
row_1114	rev3l	null	null	8296	-0.042925	-0.0249145	No
row_1115	sars	null	null	8306	-0.0460445	-0.0258259	No
row_1116	aldoaa	null	null	8313	-0.0476136	-0.0264166	No
row_1117	ddx3b	null	null	8317	-0.0485196	-0.0266875	No
row_1118	reep3b	null	null	8319	-0.0488141	-0.0267453	No
row_1119	atp2a2b	null	null	8322	-0.0498241	-0.0269086	No
row_1120	rca2.1	null	null	8329	-0.0528648	-0.0274941	No
row_1121	asmtl	null	null	8332	-0.05435	-0.0276528	No
row_1122	lig1	null	null	8334	-0.0551384	-0.0277044	No
row_1123	myo6b	null	null	8338	-0.0570008	-0.0279669	No
row_1124	ETFA	null	null	8354	-0.0601541	-0.0295022	No
row_1125	timp2a	null	null	8360	-0.0621618	-0.0299722	No
row_1126	akip1	null	null	8362	-0.0627463	-0.0300162	No
row_1127	nop2	null	null	8367	-0.065496	-0.0303766	No
row_1128	snrpg	null	null	8373	-0.0669064	-0.0308418	No
row_1129	rpusd4	null	null	8381	-0.0689312	-0.0315178	No
row_1130	bmp2k	null	null	8383	-0.0693944	-0.0315552	No
row_1131	eef1b2	null	null	8384	-0.0702848	-0.0314854	No
row_1132	DAB2	null	null	8389	-0.0715472	-0.0318398	No
row_1133	metap1	null	null	8390	-0.0720376	-0.0317682	No
row_1134	glrx	null	null	8391	-0.0721823	-0.0316966	No
row_1135	rps23	null	null	8415	-0.0772786	-0.0340656	No
row_1136	polr2l	null	null	8424	-0.0806012	-0.0348363	No
row_1137	nipsnap3a	null	null	8432	-0.0826658	-0.0354986	No
row_1138	rhot1a	null	null	8435	-0.0834117	-0.0356285	No
row_1139	hnrpkl	null	null	8444	-0.0862267	-0.0363936	No
row_1140	mfge8a	null	null	8464	-0.0916758	-0.038323	No
row_1141	cxxc1b	null	null	8475	-0.0928098	-0.0392942	No
row_1142	emc9	null	null	8478	-0.0935853	-0.039414	No
row_1143	cachd1	null	null	8480	-0.0945112	-0.0394265	No
row_1144	rqcd1	null	null	8481	-0.094873	-0.0393323	No
row_1145	ppp1r12a	null	null	8484	-0.0959585	-0.0394498	No
row_1146	znf219	null	null	8486	-0.0963656	-0.0394604	No
row_1147	kat8	null	null	8494	-0.0983815	-0.0401071	No
row_1148	tmem59	null	null	8540	-0.108917	-0.0447842	No
row_1149	timm10	null	null	8571	-0.12023	-0.047855	No
row_1150	pgam1a	null	null	8584	-0.123935	-0.049008	No
row_1151	sat1b	null	null	8605	-0.130094	-0.0510056	No
row_1152	mrpl27	null	null	8620	-0.135399	-0.0523599	No
row_1153	pno1	null	null	8621	-0.13577	-0.0522251	No
row_1154	ptgs1	null	null	8626	-0.136338	-0.0525151	No
row_1155	rftn2	null	null	8637	-0.138957	-0.0534406	No
row_1156	HSPA8	null	null	8648	-0.141366	-0.0543636	No
row_1157	ammecr1	null	null	8651	-0.141769	-0.0544355	No
row_1158	grpel2	null	null	8653	-0.142246	-0.0544007	No
row_1159	zgc:111986	null	null	8662	-0.144122	-0.0551083	No
row_1160	zgc:92818	null	null	8672	-0.146463	-0.0559199	No
row_1161	chchd4b	null	null	8687	-0.153857	-0.0572559	No
row_1162	dhfr	null	null	8691	-0.15454	-0.0574215	No
row_1163	ppp2r5d	null	null	8695	-0.155611	-0.057586	No
row_1164	ndufa2	null	null	8699	-0.15731	-0.0577489	No
row_1165	mxra8b	null	null	8704	-0.158177	-0.0580172	No
row_1166	rpl36	null	null	8709	-0.159321	-0.0582844	No
row_1167	zbtb2b	null	null	8712	-0.160445	-0.0583378	No
row_1168	phf10	null	null	8714	-0.161042	-0.0582843	No
row_1169	rpl35a	null	null	8721	-0.163804	-0.0587597	No
row_1170	ogfrl1	null	null	8726	-0.165315	-0.0590209	No
row_1171	aff3	null	null	8735	-0.167985	-0.0597049	No
row_1172	cav2	null	null	8747	-0.170595	-0.0607052	No
row_1173	nup214	null	null	8756	-0.171908	-0.0613853	No
row_1174	dhx40	null	null	8763	-0.173552	-0.061851	No
row_1175	fxr1	null	null	8765	-0.174115	-0.0617845	No
row_1176	dpm2	null	null	8768	-0.174961	-0.0618235	No
row_1177	cdc42bpb	null	null	8776	-0.17799	-0.0623911	No
row_1178	cdc34b	null	null	8789	-0.184032	-0.0634845	No
row_1179	EPB41L2	null	null	8798	-0.187958	-0.0641486	No
row_1180	derl2	null	null	8806	-0.189644	-0.0647047	No
row_1181	ulk1a	null	null	8807	-0.190103	-0.064516	No
row_1182	adob	null	null	8816	-0.195023	-0.0651731	No
row_1183	tnikb	null	null	8832	-0.198196	-0.0665714	No
row_1184	cdh11	null	null	8836	-0.198495	-0.0666933	No
row_1185	psmd1	null	null	8838	-0.199236	-0.0666019	No
row_1186	b3gnt2b	null	null	8844	-0.201862	-0.0669332	No
row_1187	cept1a	null	null	8859	-0.207751	-0.0682157	No
row_1188	bccip	null	null	8874	-0.210839	-0.0694951	No
row_1189	rpl14	null	null	8884	-0.213228	-0.0702405	No
row_1190	lcmt1	null	null	8892	-0.215147	-0.0707712	No
row_1191	tagln2	null	null	8902	-0.218508	-0.0715114	No
row_1192	wtap	null	null	8907	-0.222378	-0.071716	No
row_1193	fgfr2	null	null	8910	-0.222785	-0.0717075	No
row_1194	chuk	null	null	8911	-0.22279	-0.0714863	No
row_1195	sdc4	null	null	8918	-0.225357	-0.0719006	No
row_1196	paf1	null	null	8926	-0.227225	-0.0724194	No
row_1197	CABZ01032488.1	null	null	8940	-0.23215	-0.0735713	No
row_1198	col6a1	null	null	8963	-0.242349	-0.0756702	No
row_1199	cited2	null	null	8982	-0.251344	-0.0773347	No
row_1200	polr3k	null	null	8990	-0.253117	-0.0778278	No
row_1201	brd4	null	null	8992	-0.253627	-0.0776823	No
row_1202	chmp2bb	null	null	8993	-0.2545	-0.0774297	No
row_1203	vps26a	null	null	8995	-0.255654	-0.0772822	No
row_1204	egfra	null	null	9001	-0.257185	-0.0775586	No
row_1205	pfn2	null	null	9007	-0.259688	-0.0778325	No
row_1206	FAM57A	null	null	9012	-0.261812	-0.0779979	No
row_1207	etnk1	null	null	9018	-0.265269	-0.0782663	No
row_1208	srpr	null	null	9021	-0.266252	-0.0782146	No
row_1209	dhx9	null	null	9022	-0.266361	-0.0779502	No
row_1210	prkacbb	null	null	9036	-0.271236	-0.0790634	No
row_1211	plekhf2	null	null	9043	-0.27402	-0.0794293	No
row_1212	st13	null	null	9055	-0.279129	-0.080322	No
row_1213	cpxm1b	null	null	9102	-0.296746	-0.0849189	No
row_1214	ttc17	null	null	9106	-0.298933	-0.0849412	No
row_1215	rps21	null	null	9118	-0.302954	-0.0858101	No
row_1216	taf6	null	null	9126	-0.304956	-0.0862518	No
row_1217	dhps	null	null	9135	-0.309161	-0.0867955	No
row_1218	chpfa	null	null	9148	-0.313384	-0.0877605	No
row_1219	sh3rf1	null	null	9177	-0.322172	-0.0904181	No
row_1220	tacc1	null	null	9185	-0.325063	-0.0908398	No
row_1221	ube2g1a	null	null	9193	-0.326794	-0.0912597	No
row_1222	osbpl10b	null	null	9205	-0.33256	-0.0920993	No
row_1223	trim13	null	null	9229	-0.343585	-0.094204	No
row_1224	atp2a2a	null	null	9239	-0.346157	-0.0948174	No
row_1225	gstm.1	null	null	9262	-0.356668	-0.0968027	No
row_1226	flncb	null	null	9279	-0.361283	-0.0981455	No
row_1227	gabpa	null	null	9281	-0.361684	-0.0978928	No
row_1228	nfatc1	null	null	9298	-0.369757	-0.0992271	No
row_1229	KDELR3	null	null	9310	-0.374507	-0.100025	No
row_1230	fyco1a	null	null	9314	-0.376906	-0.0999699	No
row_1231	crk	null	null	9316	-0.377409	-0.0997015	No
row_1232	yme1l1a	null	null	9318	-0.377525	-0.0994331	No
row_1233	eef1db	null	null	9338	-0.387283	-0.101069	No
row_1234	eif2s3	null	null	9344	-0.390538	-0.101213	No
row_1235	mapk3	null	null	9349	-0.394571	-0.101247	No
row_1236	dhrs1	null	null	9351	-0.395514	-0.10096	No
row_1237	btbd10b	null	null	9361	-0.398631	-0.101522	No
row_1238	hsp90b1	null	null	9382	-0.406934	-0.103244	No
row_1239	egr1	null	null	9383	-0.407282	-0.10284	No
row_1240	fam120c	null	null	9396	-0.413148	-0.103706	No
row_1241	ssb	null	null	9400	-0.414507	-0.103614	No
row_1242	lamp2	null	null	9411	-0.418013	-0.104262	No
row_1243	tmed2	null	null	9412	-0.418173	-0.103847	No
row_1244	capza1a	null	null	9416	-0.420234	-0.103749	No
row_1245	rrs1	null	null	9431	-0.424988	-0.104815	No
row_1246	pgrmc1	null	null	9432	-0.425179	-0.104393	No
row_1247	fkbp3	null	null	9446	-0.429475	-0.105349	No
row_1248	rrp12	null	null	9461	-0.436254	-0.106405	No
row_1249	caprin1b	null	null	9475	-0.447583	-0.107343	No
row_1250	tmem30aa	null	null	9482	-0.449639	-0.107535	No
row_1251	map1lc3b	null	null	9493	-0.455334	-0.108146	No
row_1252	tnc	null	null	9494	-0.455824	-0.107694	No
row_1253	b2ml	null	null	9521	-0.470355	-0.109991	No
row_1254	camsap1b	null	null	9540	-0.481525	-0.111428	No
row_1255	id2a	null	null	9543	-0.482374	-0.111161	No
row_1256	ip6k2a	null	null	9548	-0.485395	-0.111105	No
row_1257	ets2	null	null	9549	-0.48626	-0.110622	No
row_1258	magoh	null	null	9554	-0.489495	-0.110562	No
row_1259	ppm1bb	null	null	9587	-0.508619	-0.113459	No
row_1260	pafah1b1b	null	null	9619	-0.524013	-0.116236	No
row_1261	prkx	null	null	9620	-0.524065	-0.115715	No
row_1262	pttg1ipb	null	null	9632	-0.530056	-0.116359	No
row_1263	fbxo11a	null	null	9655	-0.541965	-0.11816	No
row_1264	stat3	null	null	9656	-0.542152	-0.117622	No
row_1265	zswim5	null	null	9660	-0.543202	-0.117402	No
row_1266	supt6h	null	null	9661	-0.543878	-0.116862	No
row_1267	tmpoa	null	null	9671	-0.549882	-0.117273	No
row_1268	dvl2	null	null	9679	-0.553384	-0.117468	No
row_1269	pcna	null	null	9682	-0.556776	-0.117128	No
row_1270	amd1	null	null	9684	-0.558155	-0.11668	No
row_1271	birc2	null	null	9690	-0.561357	-0.116655	No
row_1272	hrasb	null	null	9698	-0.564614	-0.116839	No
row_1273	sarnp	null	null	9700	-0.565182	-0.116384	No
row_1274	ssr3	null	null	9719	-0.577725	-0.117724	No
row_1275	ubap2l	null	null	9747	-0.594151	-0.120006	No
row_1276	ccnd1	null	null	9771	-0.612593	-0.121843	No
row_1277	mmp13a	null	null	9772	-0.613307	-0.121234	No
row_1278	anxa11a	null	null	9786	-0.623156	-0.121998	No
row_1279	atg12	null	null	9788	-0.625781	-0.121483	No
row_1280	gpr137c	null	null	9793	-0.631757	-0.121281	No
row_1281	snap23.1	null	null	9794	-0.631961	-0.120654	No
row_1282	igf1rb	null	null	9796	-0.63246	-0.120133	No
row_1283	prdx3	null	null	9799	-0.634553	-0.119715	No
row_1284	traf4a	null	null	9810	-0.639492	-0.120144	No
row_1285	tnika	null	null	9822	-0.655054	-0.120663	No
row_1286	slc3a2a	null	null	9830	-0.665459	-0.120747	No
row_1287	anxa11b	null	null	9840	-0.672178	-0.121037	No
row_1288	mfge8b	null	null	9851	-0.685442	-0.12142	No
row_1289	ciapin1	null	null	9860	-0.6901	-0.121585	No
row_1290	wls	null	null	9875	-0.697666	-0.122381	No
row_1291	higd1a	null	null	9885	-0.706029	-0.122638	No
row_1292	imp4	null	null	9895	-0.713966	-0.122886	No
row_1293	eif3d	null	null	9903	-0.720024	-0.122915	No
row_1294	tcf7l2	null	null	9906	-0.72251	-0.122411	No
row_1295	bcl2l1	null	null	9908	-0.72324	-0.121799	No
row_1296	cdca4	null	null	9914	-0.729811	-0.121606	No
row_1297	msi2b	null	null	9917	-0.732879	-0.121091	No
row_1298	cycsb	null	null	9921	-0.736853	-0.120679	No
row_1299	phldb2b	null	null	9922	-0.737242	-0.119947	No
row_1300	prodha	null	null	9925	-0.739699	-0.119425	No
row_1301	arid3a	null	null	9930	-0.742334	-0.119114	No
row_1302	dnajb12b	null	null	9964	-0.784693	-0.121844	No
row_1303	hnrnpa1a	null	null	9981	-0.803745	-0.122748	No
row_1304	birc6	null	null	9983	-0.804879	-0.122055	No
row_1305	brwd1	null	null	9991	-0.813769	-0.121991	No
row_1306	nap1l1	null	null	10000	-0.827309	-0.122021	No
row_1307	ccnt2b	null	null	10006	-0.830422	-0.121728	No
row_1308	tsc22d2	null	null	10013	-0.849076	-0.121523	No
row_1309	sh3kbp1	null	null	10014	-0.849476	-0.12068	No
row_1310	agpat5	null	null	10016	-0.850773	-0.119942	No
row_1311	tjp1b	null	null	10017	-0.851206	-0.119097	No
row_1312	ppfibp1b	null	null	10023	-0.861457	-0.118773	No
row_1313	tcf3a	null	null	10030	-0.865435	-0.118552	No
row_1314	pabpc1b	null	null	10040	-0.873212	-0.118642	No
row_1315	top1l	null	null	10048	-0.883271	-0.11851	No
row_1316	dnm1l	null	null	10049	-0.886558	-0.11763	No
row_1317	cox17	null	null	10058	-0.900944	-0.117586	No
row_1318	odc1	null	null	10062	-0.902751	-0.117009	No
row_1319	ak2	null	null	10067	-0.90721	-0.116533	No
row_1320	acp6	null	null	10080	-0.927325	-0.116889	No
row_1321	creb1b	null	null	10086	-0.93675	-0.116491	No
row_1322	btg2	null	null	10103	-0.949384	-0.11725	No
row_1323	gadd45aa	null	null	10105	-0.950683	-0.116412	No
row_1324	abcc5	null	null	10107	-0.954446	-0.115571	No
row_1325	furina	null	null	10113	-0.960844	-0.115149	No
row_1326	srrm2	null	null	10127	-0.975123	-0.115563	No
row_1327	rdh10b	null	null	10128	-0.976323	-0.114594	No
row_1328	ube2g2	null	null	10147	-0.993863	-0.115521	No
row_1329	rad23b	null	null	10148	-0.993971	-0.114535	No
row_1330	hnrnpabb	null	null	10154	-1.00194	-0.114072	No
row_1331	cldn5a	null	null	10156	-1.00506	-0.11318	No
row_1332	smad3a	null	null	10160	-1.01319	-0.112493	No
row_1333	hspa4a	null	null	10168	-1.02726	-0.112218	No
row_1334	maea	null	null	10171	-1.03325	-0.111405	No
row_1335	arhgef1b	null	null	10180	-1.05917	-0.111204	No
row_1336	dnajb6b	null	null	10185	-1.06539	-0.110572	No
row_1337	cdkn1a	null	null	10192	-1.07513	-0.110143	No
row_1338	stat1a	null	null	10196	-1.07965	-0.10939	No
row_1339	sik2b	null	null	10205	-1.08703	-0.109161	No
row_1340	rnf11a	null	null	10210	-1.09306	-0.108502	No
row_1341	mgst3a	null	null	10211	-1.09879	-0.107411	No
row_1342	si:dkey-20i20.2	null	null	10214	-1.10389	-0.106528	No
row_1343	hnrnpa1b	null	null	10219	-1.1098	-0.105851	No
row_1344	mycb	null	null	10222	-1.12152	-0.10495	No
row_1345	EIF1B	null	null	10229	-1.13368	-0.104463	No
row_1346	tmtc1	null	null	10240	-1.14243	-0.104392	No
row_1347	col11a1a	null	null	10248	-1.15215	-0.103993	No
row_1348	hnrpdl	null	null	10250	-1.15424	-0.102953	No
row_1349	nop53	null	null	10251	-1.15479	-0.101807	No
row_1350	atf5b	null	null	10253	-1.16094	-0.100761	No
row_1351	pdcl	null	null	10257	-1.16232	-0.0999259	No
row_1352	azin1b	null	null	10262	-1.1755	-0.0991843	No
row_1353	hspe1	null	null	10266	-1.18382	-0.0983281	No
row_1354	lonp1	null	null	10270	-1.18839	-0.0974673	No
row_1355	ptmaa	null	null	10274	-1.19222	-0.0966028	No
row_1356	ncoa3	null	null	10275	-1.19306	-0.0954184	No
row_1357	hsdl2	null	null	10286	-1.21614	-0.0952745	No
row_1358	mrpl16	null	null	10287	-1.21697	-0.0940664	No
row_1359	fosb	null	null	10289	-1.22054	-0.092961	No
row_1360	ube2h	null	null	10290	-1.2209	-0.091749	No
row_1361	tob1a	null	null	10294	-1.22927	-0.0908477	No
row_1362	elovl6	null	null	10303	-1.24237	-0.0904651	No
row_1363	atf6	null	null	10308	-1.24621	-0.0896532	No
row_1364	paics	null	null	10332	-1.29124	-0.0908172	No
row_1365	rbms2b	null	null	10333	-1.29236	-0.0895342	No
row_1366	srsf6b	null	null	10346	-1.31585	-0.0895039	No
row_1367	myca	null	null	10350	-1.32401	-0.0885086	No
row_1368	polr2a	null	null	10361	-1.33533	-0.0882463	No
row_1369	dusp6	null	null	10377	-1.36648	-0.0884848	No
row_1370	ints6	null	null	10383	-1.38008	-0.0876465	No
row_1371	stk3	null	null	10384	-1.3815	-0.086275	No
row_1372	vapal	null	null	10385	-1.38244	-0.0849026	No
row_1373	trmt61a	null	null	10386	-1.38251	-0.0835302	No
row_1374	slc25a24	null	null	10394	-1.40169	-0.082883	No
row_1375	sfpq	null	null	10403	-1.41603	-0.082328	No
row_1376	vclb	null	null	10408	-1.42511	-0.0813386	No
row_1377	srsf3a	null	null	10427	-1.45068	-0.0818125	No
row_1378	cald1a	null	null	10433	-1.46831	-0.0808866	No
row_1379	acp2	null	null	10436	-1.4766	-0.0796334	No
row_1380	xpc	null	null	10449	-1.49572	-0.0794246	No
row_1381	nol12	null	null	10453	-1.50847	-0.0782461	No
row_1382	ube3a	null	null	10467	-1.53883	-0.0781008	No
row_1383	hnrnpua	null	null	10473	-1.55101	-0.0770928	No
row_1384	rhbdf1a	null	null	10484	-1.57424	-0.0765934	No
row_1385	lsm12a	null	null	10492	-1.58348	-0.0757658	No
row_1386	tcf3b	null	null	10499	-1.59941	-0.074816	No
row_1387	txndc12	null	null	10511	-1.62752	-0.07437	No
row_1388	ctdsp1	null	null	10521	-1.64983	-0.0736892	No
row_1389	h3f3a	null	null	10534	-1.68575	-0.0732918	No
row_1390	hspb1	null	null	10537	-1.69685	-0.0718199	No
row_1391	hbp1	null	null	10545	-1.71347	-0.0708633	No
row_1392	psme4b	null	null	10550	-1.71819	-0.069583	No
row_1393	sf3b3	null	null	10572	-1.79223	-0.0700368	No
row_1394	clic4	null	null	10575	-1.79642	-0.0684662	No
row_1395	map4k5	null	null	10576	-1.7992	-0.06668	No
row_1396	ppp4r2b	null	null	10577	-1.79934	-0.0648938	No
row_1397	tmem2	null	null	10583	-1.81282	-0.0636258	No
row_1398	slc3a2b	null	null	10586	-1.82294	-0.0620288	No
row_1399	swap70b	null	null	10593	-1.84496	-0.0608353	No
row_1400	zfand5b	null	null	10594	-1.84774	-0.0590009	No
row_1401	celf1	null	null	10601	-1.87438	-0.0577782	No
row_1402	tmbim4	null	null	10603	-1.88424	-0.056014	No
row_1403	yipf6	null	null	10606	-1.89915	-0.0543413	No
row_1404	fosab	null	null	10618	-1.94238	-0.0535828	No
row_1405	igfbp5b	null	null	10620	-1.94616	-0.0517571	No
row_1406	sav1	null	null	10632	-1.9842	-0.050957	No
row_1407	tax1bp1b	null	null	10640	-2.01619	-0.0496999	No
row_1408	kif5ba	null	null	10641	-2.01735	-0.0476972	No
row_1409	ptgs2a	null	null	10651	-2.06071	-0.0466085	No
row_1410	zgc:158564	null	null	10653	-2.06379	-0.044666	No
row_1411	creb1a	null	null	10674	-2.12576	-0.0446825	No
row_1412	tbc1d23	null	null	10676	-2.12994	-0.0426743	No
row_1413	agpat2	null	null	10680	-2.14954	-0.0408594	No
row_1414	ppid	null	null	10681	-2.15577	-0.0387193	No
row_1415	ptmab	null	null	10685	-2.17643	-0.0368777	No
row_1416	sdad1	null	null	10687	-2.18495	-0.034815	No
row_1417	creb3l2	null	null	10689	-2.19196	-0.0327453	No
row_1418	vps41	null	null	10692	-2.19491	-0.030779	No
row_1419	gulp1a	null	null	10694	-2.20062	-0.0287007	No
row_1420	tab1	null	null	10700	-2.22119	-0.0270274	No
row_1421	ptgs2b	null	null	10727	-2.35004	-0.0274592	No
row_1422	ndufa10	null	null	10740	-2.44388	-0.0263091	No
row_1423	id1	null	null	10753	-2.51475	-0.0250887	No
row_1424	bms1	null	null	10758	-2.5739	-0.0229588	No
row_1425	p4ha1b	null	null	10767	-2.64237	-0.0211864	No
row_1426	ak4	null	null	10768	-2.65236	-0.0185533	No
row_1427	dcaf7	null	null	10775	-2.75584	-0.0164555	No
row_1428	sfswap	null	null	10784	-2.83792	-0.0144889	No
row_1429	ccnt2a	null	null	10792	-2.93203	-0.0123226	No
row_1430	prkag2a	null	null	10795	-2.95481	-0.00960189	No
row_1431	prmt1	null	null	10797	-3.01757	-0.00671259	No
row_1432	gpx1a	null	null	10806	-3.21593	-0.00437073	No
row_1433	rchy1	null	null	10823	-3.59802	-0.00250027	No
row_1434	fzd2	null	null	10831	-4.01842	0.000744585	No

## Sheet: Sup File 1f  WT1 & p53(shared) 
NAME	PROBE	GENE SYMBOL	GENE_TITLE	RANK IN GENE LIST	RANK METRIC SCORE	RUNNING ES	CORE ENRICHMENT
row_0	tp53	null	null	600	2.06745	0.123864	No
row_1	cav1	null	null	1663	0.866722	0.100886	No
row_2	igf2a	null	null	3053	0.460999	0.0124961	No
row_3	igf1ra	null	null	3215	0.427624	0.0347055	No
row_4	igf2b	null	null	3739	0.336089	0.0155192	No
row_5	tgfb1a	null	null	5219	0.107733	-0.111828	No
row_6	smad3b	null	null	5772	0.0528751	-0.158259	No
row_7	abcb4	null	null	7101	0	-0.280994	No
row_8	thbs1b	null	null	8249	-0.0314288	-0.384276	No
row_9	wtap	null	null	8907	-0.222378	-0.425709	Yes
row_10	fgfr2	null	null	8910	-0.222785	-0.406571	Yes
row_11	egfra	null	null	9001	-0.257185	-0.392583	Yes
row_12	egr1	null	null	9383	-0.407282	-0.39247	Yes
row_13	igf1rb	null	null	9796	-0.63246	-0.375693	Yes
row_14	odc1	null	null	10062	-0.902751	-0.321886	Yes
row_15	smad3a	null	null	10160	-1.01319	-0.242974	Yes
row_16	cdkn1a	null	null	10192	-1.07513	-0.152589	Yes
row_17	mycb	null	null	10222	-1.12152	-0.0579963	Yes
row_18	myca	null	null	10350	-1.32401	0.0451017	Yes
