# Supplementary material for: Wilms Tumor 1b defines a wound-specific sheath cell subpopulation associated with notochord repair
Source: eLife journal article supplement (doi:10.7554/elife.30657), 2018-02-06
Supplement: supp [file elife-30657-supp-v1.zip › elife_poa_e30657_Supplementary_File_2.xlsx]

## Sheet: Sheet1
qPCR primers
actinQ-F2	GACAACGGCTCCGGTATGTG
actinQ-R2	TGCCAACCATCACTCCCTGAT
GAPHDQ-F	TATAGCGAGAGGGACCCAGC
GAPHDQ-R	TGACTCTCTTTGCACCACCC
wt1aQ-F2:	CTTAAGACCCACACCCGGAC
wt1aQ-R2:	GAGCTCATCTGACCTGGCAA
wt1aQ-F3:	GGTTATGAGAGCGACCCCAG
wt1aQ-R3:	CACAATGGCAGGAGTGATGC
mgpQ-F:	ACCCATATCAGGCCAACGC
mgpQ-R:	CGGAGAGAAGTCCTCACACAC
sox9bQ-F2:	CTCCACCAATGCGCTGTTCA
sox9bQ-R2:	CCTGAGACTGACCGGAGTGTTC
wt1b genotyping primers:
F:	CGCTTTGTGTTTACGCCAGA
R:	ATGTGTGTGTGTAGGGGTGT
