# Supplementary figures and images for: Wilms Tumor 1b defines a wound-specific sheath cell subpopulation associated with notochord repair
Source: eLife journal article supplement (doi:10.7554/elife.30657), 2018-02-06

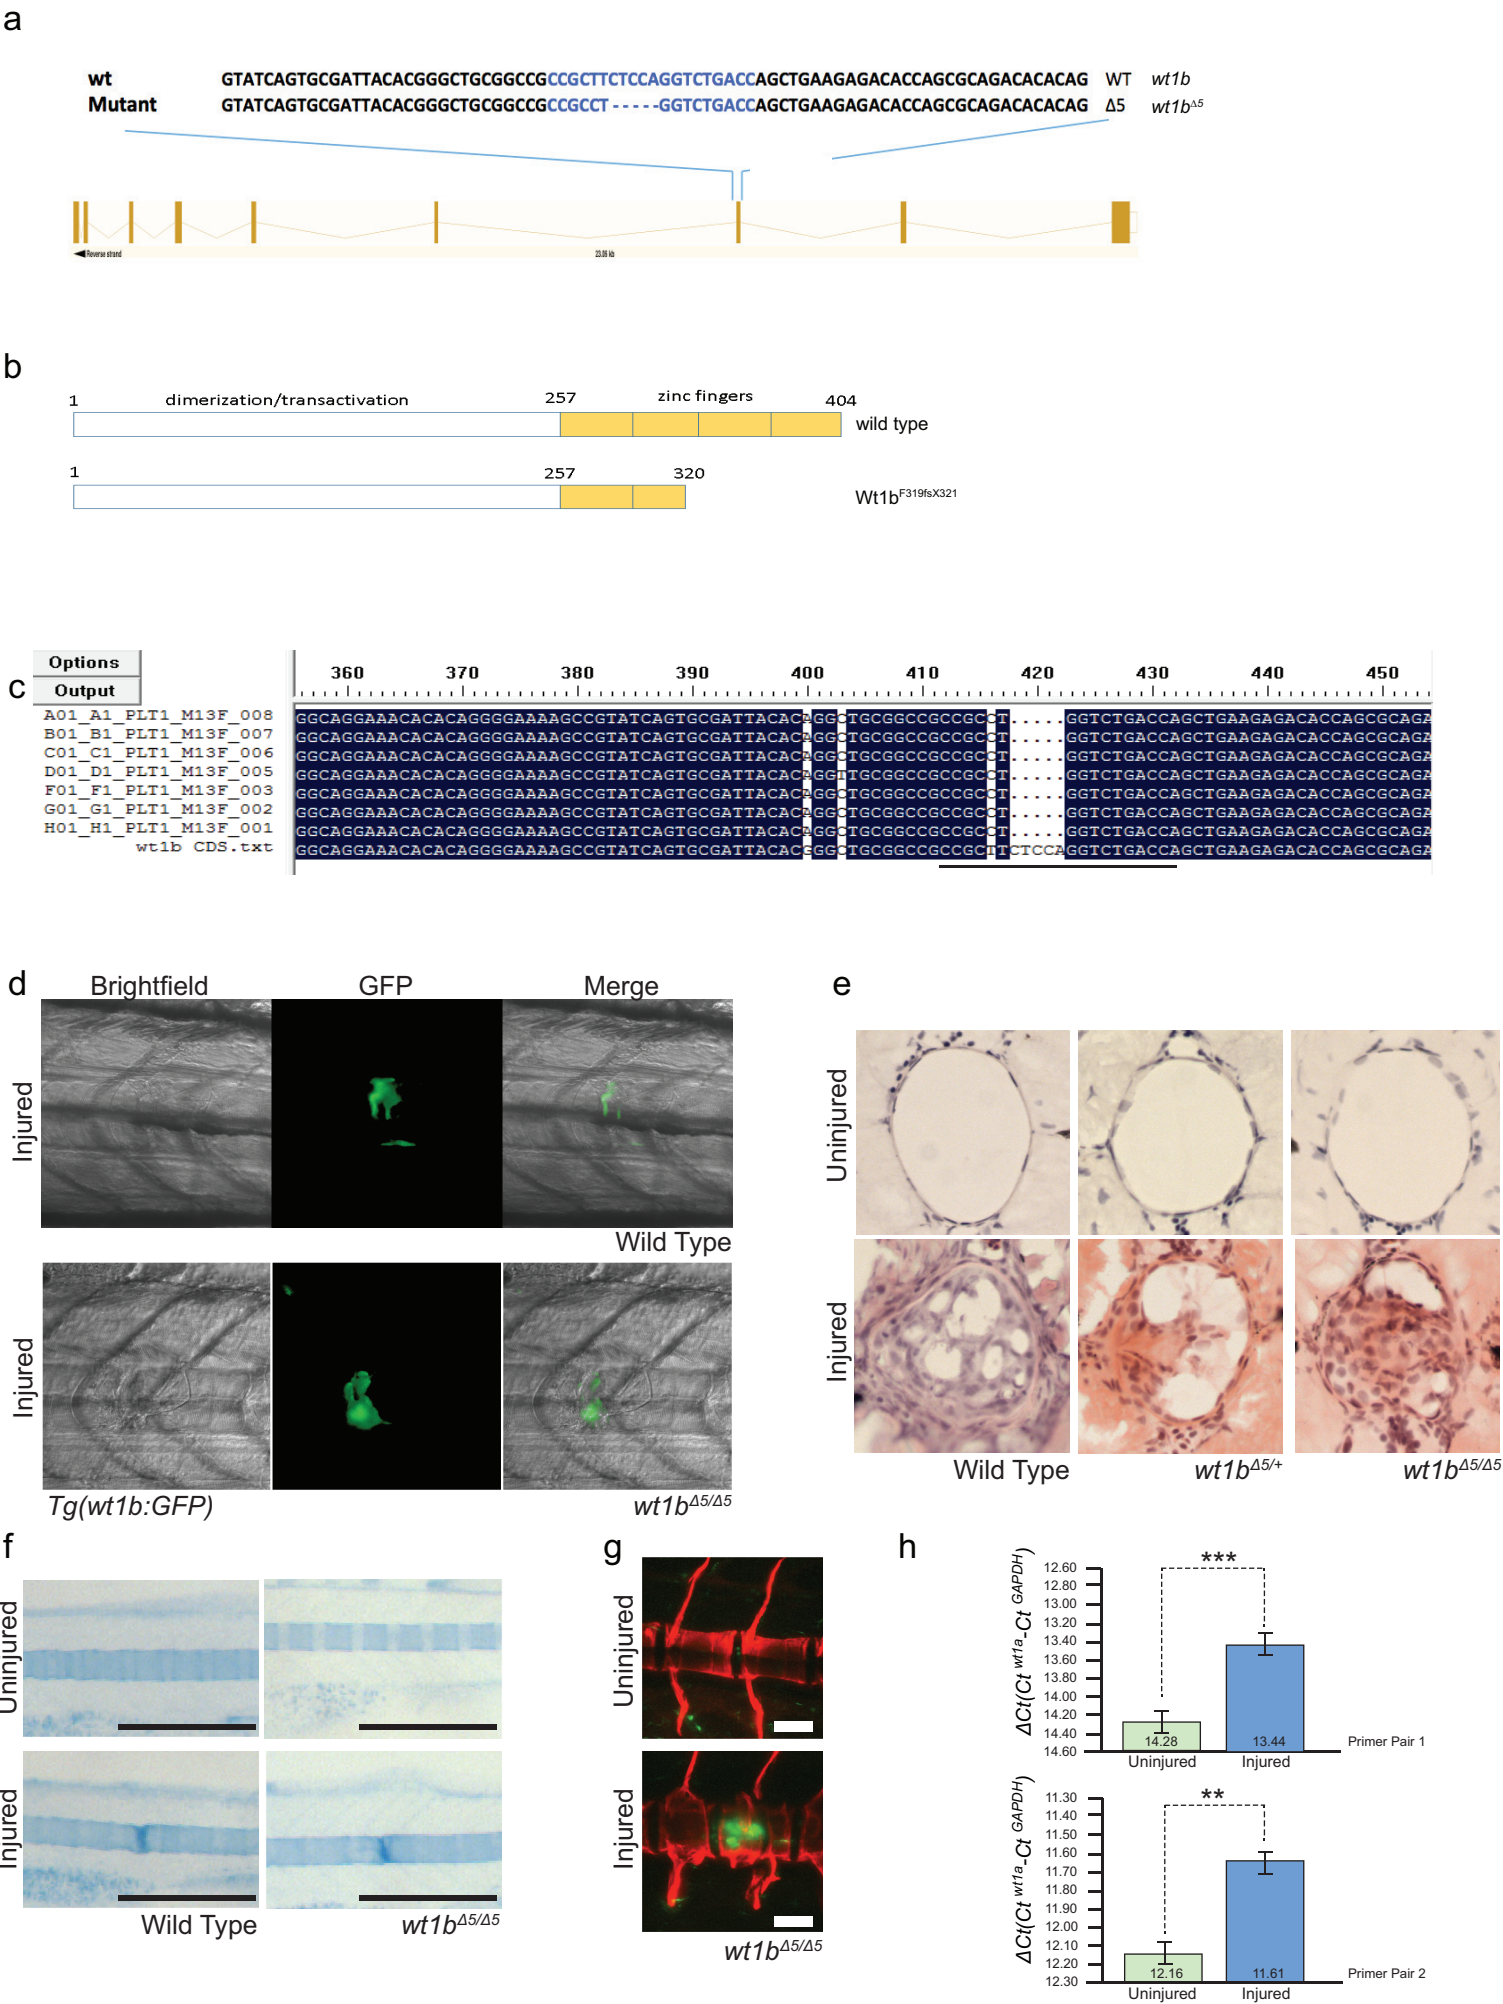

Figure 8 - figure supplement 1. Lopez-Baez et al.

Supplement: supp [file elife-30657-supp-v1.zip]

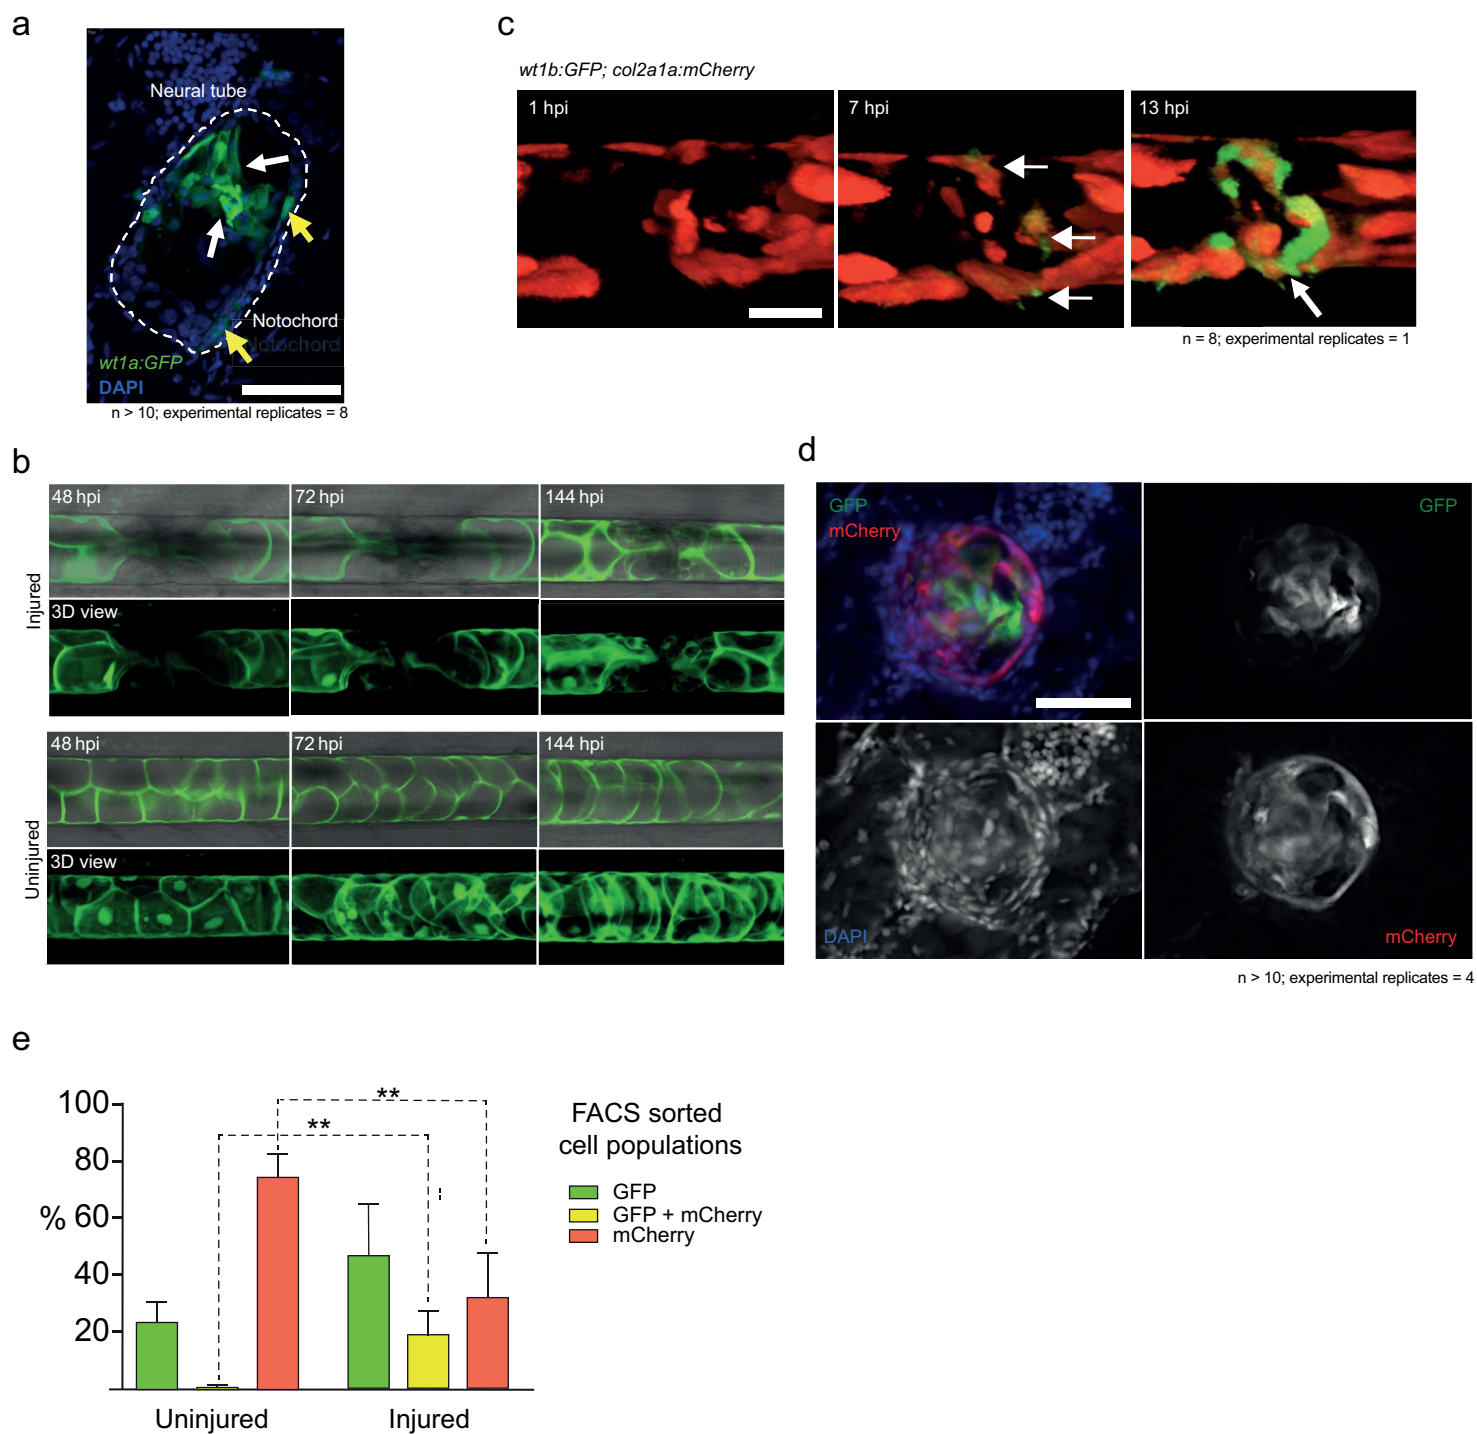

Figure 2 - figure supplement 1. Lopez-Baez et al.

Supplement: supp [file elife-30657-supp-v1.zip › elife_poa_e30657_Figure_2_figure_supplement_1.pdf]

a

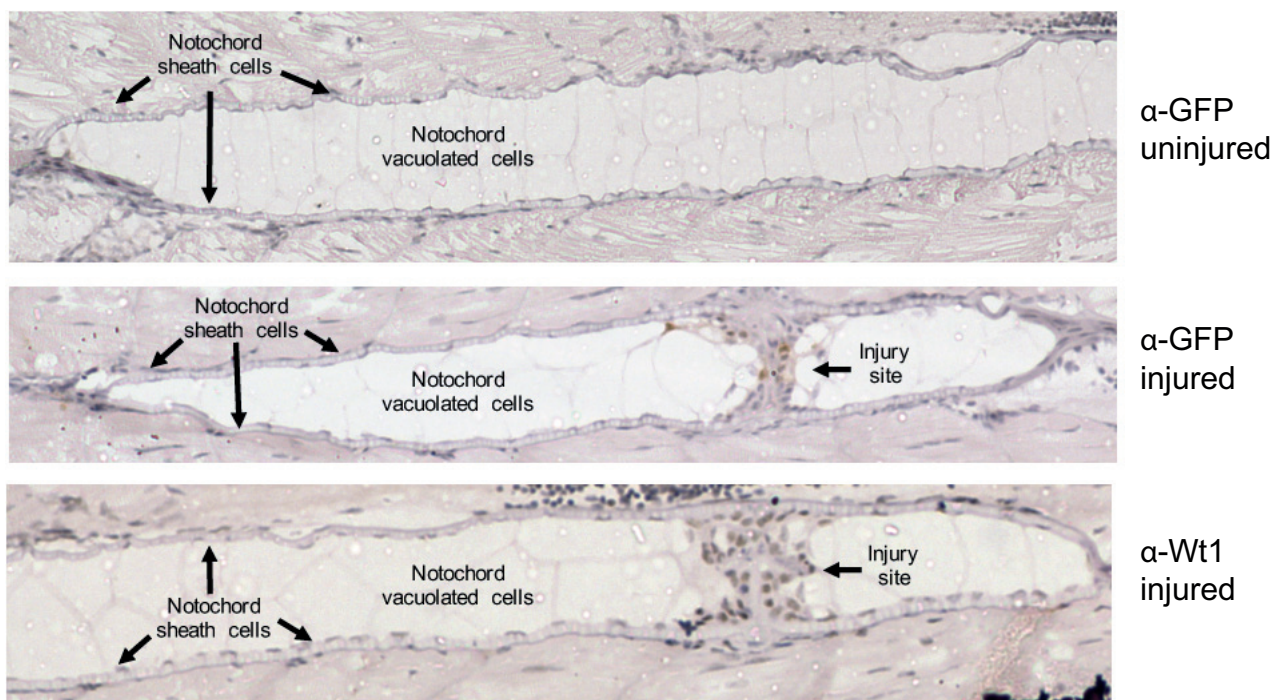

b

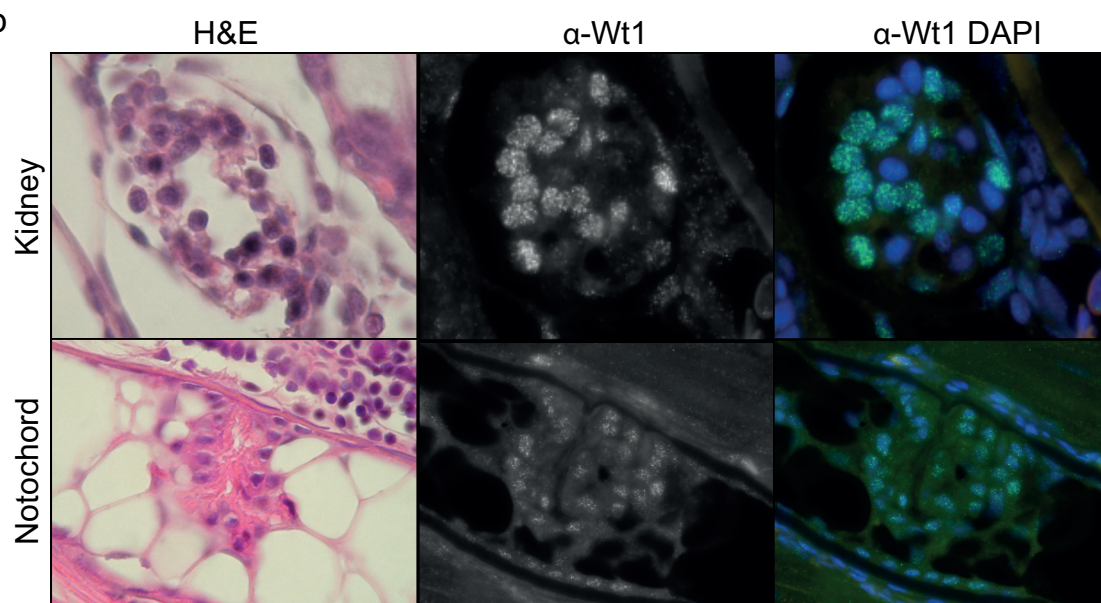

Supplement: supp [file elife-30657-supp-v1.zip › elife_poa_e30657_Figure_1_figure_supplement_2.pdf]

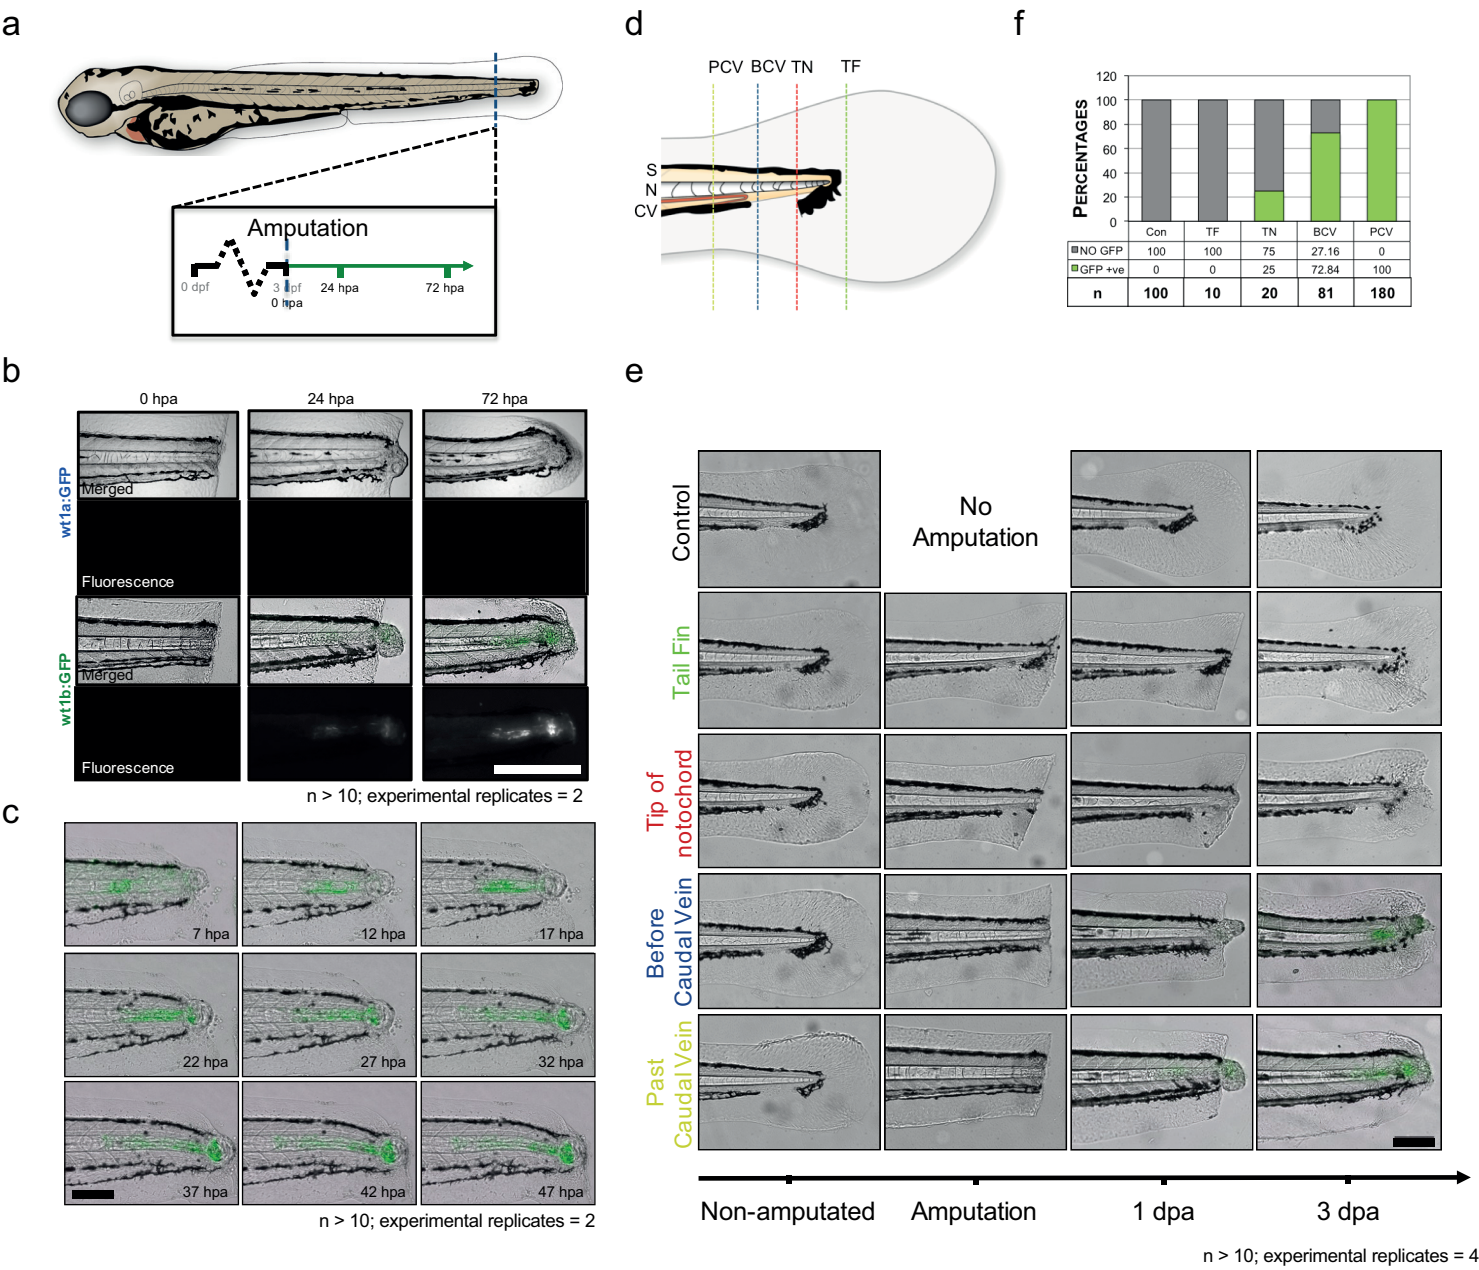

Figure 1 - figure supplement 1. Lopez-Baez et al.

Supplement: supp [file elife-30657-supp-v1.zip › elife_poa_e30657_Figure_1_figure_supplement_1.pdf]

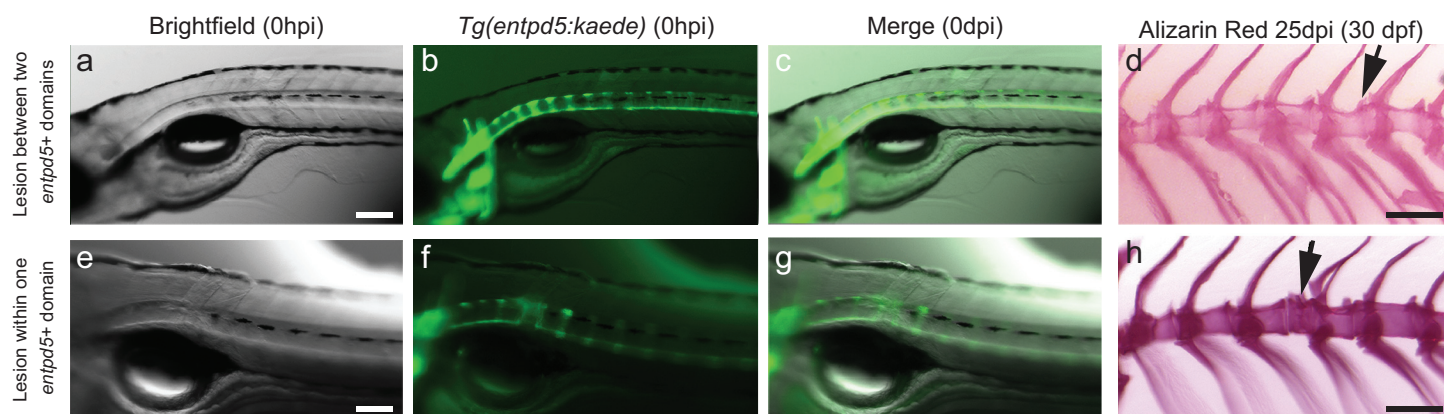

Figure 6 -figure supplement 1. Lopez-Baez et al.

Supplement: supp [file elife-30657-supp-v1.zip › elife_poa_e30657_Figure_6_figure_supplement_1.pdf]

DMSO

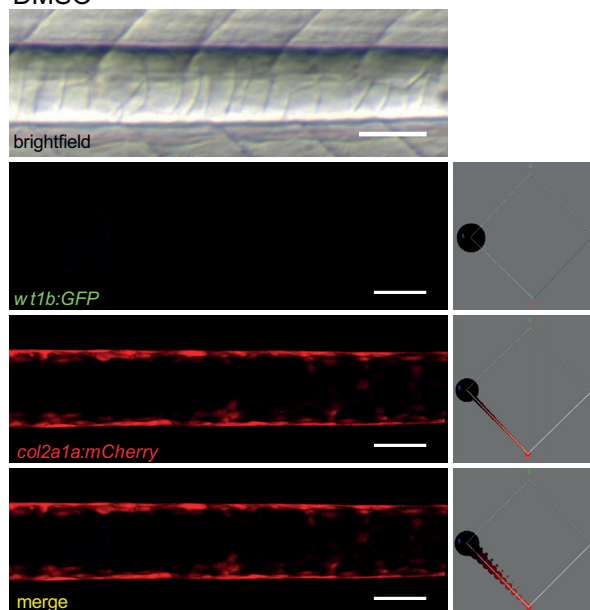

20 $\mu$ M Nystatin

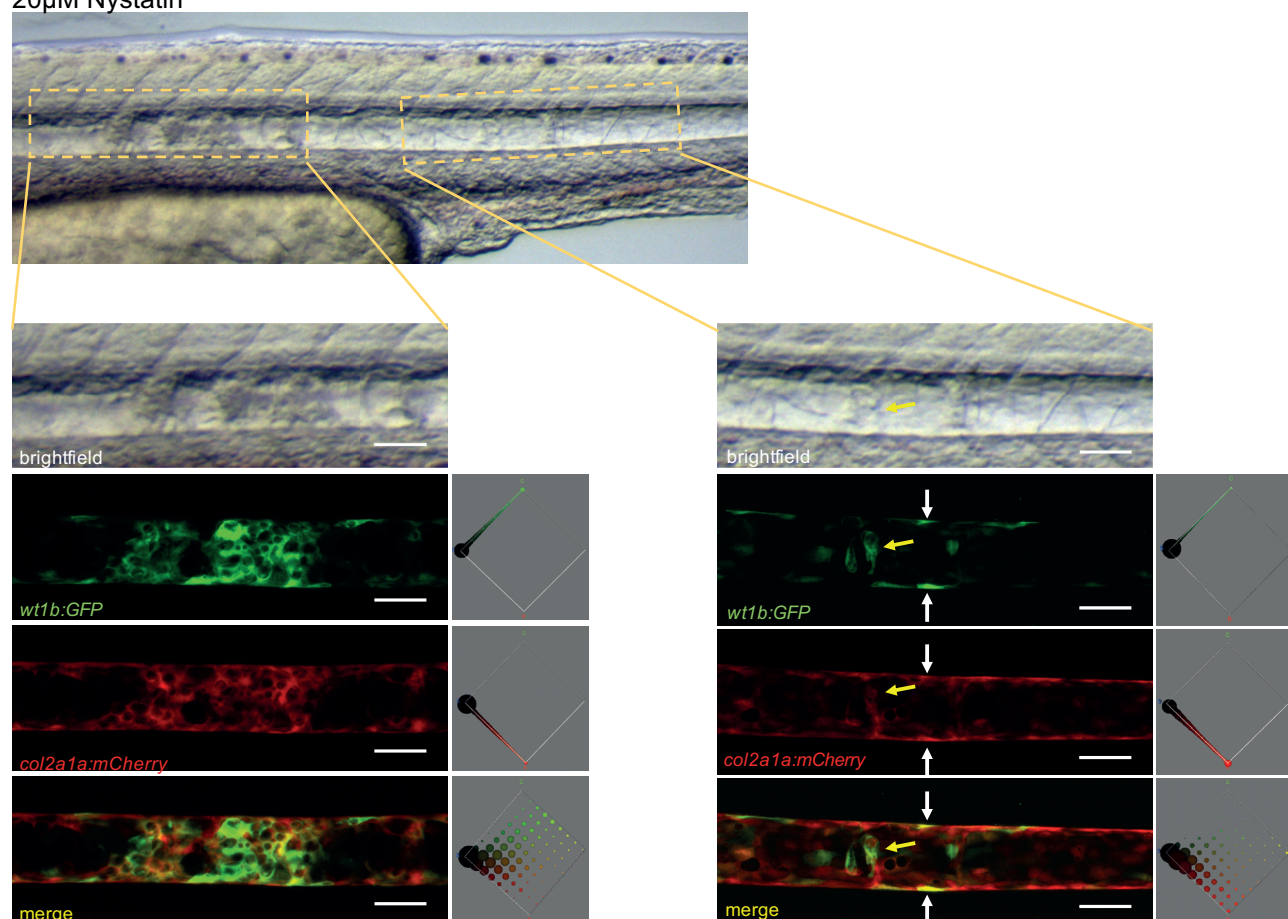

Figure 2 - figure supplement 2. Lopez-Baez et al.

Supplement: supp [file elife-30657-supp-v1.zip › elife_poa_e30657_Figure_2_figure_supplement_2.pdf]
